# Supplementary material for: Regioselective copper-diamine-catalyzed C–H arylation of 1,2,4-triazole ring with aryl bromides
Source: Royal Society of Chemistry journal article supplement (doi:10.1039/c6ra14670h), 2016-01-01

## Supporting Information

### **Regioselective Copper-Diamine-Catalyzed C-H Arylation of 1,2,4-Triazole Ring with Aryl Bromides**

Zaini Jamal and Yong-Chua Teo\*

*Natural Sciences and Science Education, National Institute of Education, Nanyang  
Technological University, 1 Nanyang Walk, Singapore 637616, Singapore.*

*Tel: (+65) 6790 3846; Fax: (+65) 6896 9414; E-mail: yongchua.teo@nie.edu.sg*

## Table of Contents

|                                                                                                          |              |
|----------------------------------------------------------------------------------------------------------|--------------|
| <b>General Considerations</b>                                                                            | <b>SI 2</b>  |
| <b>Synthesis of Substrates</b>                                                                           | <b>SI 3</b>  |
| <b>General Procedure for Cu-catalyzed C-H Arylation</b>                                                  | <b>SI 4</b>  |
| <b>Characterization Data for Arylated Products</b>                                                       | <b>SI 4</b>  |
| <b>References</b>                                                                                        | <b>SI 16</b> |
| <b>Copies of <math>^1\text{H}</math> and <math>^{13}\text{C}</math> NMR Spectra of Arylated Products</b> | <b>SI 17</b> |

## General Considerations

All commercially available chemicals and anhydrous solvents were used directly upon purchase from suppliers. Analytical thin layer chromatography (TLC) was performed using Merck 60 F254 precoated silica gel plates (0.2 mm thickness) and visualized using UV radiation on Spectroline Model ENF-24061/F 254 nm. Flash chromatography was performed using Merck silica gel 60 with AR grade solvents. Columns were packed as a silica gel suspension in hexane prior to elution by the appropriate solvent system (hexane/EtOAc). Melting points were determined using OptiMelt automated melting point system and are uncorrected. Nuclear magnetic resonance (NMR) spectra were recorded on a Bruker Avance DPX 400 spectrophotometer. Chemical shifts for  $^1\text{H}$  and  $^{13}\text{C}$  NMR are reported as  $\delta$  in units of parts per million (ppm) downfield from  $\text{SiMe}_4$  and relative to the residual signal of  $\text{CDCl}_3$  ( $\delta$  7.26, singlet for  $^1\text{H}$  NMR;  $\delta$  77.06, triplet for  $^{13}\text{C}$  NMR). Multiplicities are reported based on apparent multiplicities and coupling constants ( $J$  values) are reported in unit of Hertz (Hz). Numbers of protons are reported based on the appropriate integration of the signals. IR spectra were recorded using Perkin–Elmer Paragon 100 FT-IR spectrophotometer on KBr plates. Mass spectroscopy was performed using Agilent 1100 series LC/MSD.

## Synthesis of Substrates

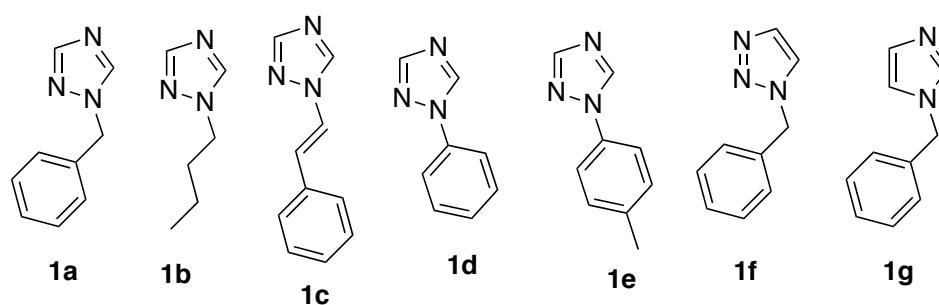

**1a** was synthesized according to modified literature procedure: To an oven-dried 50-mL RBF equipped with a magnetic stir bar, benzyl bromide (5.0 mmol) and MeCN (20 mL) were added.  $K_2CO_3$  (3.0 equiv.) was then slowly added followed by 1,2,4-triazole (5.0 equiv.). The reaction mixture was then heated at 85 °C under  $N_2$  for overnight. Upon cooling to room temperature, the reaction mixture was passed through a pad of celite with EtOAc washing and the filtrate was then concentrated under reduced pressure. The residue was next redissolved in EtOAc and subsequently washed with concentrated aqueous  $NaHCO_3$  (3 times), water and brine. The organic layer was then dried  $Na_2SO_4$  and concentrated under reduced pressure to afford the analytically pure **1a** as light yellow viscous oil which slowly solidified to off-white solid in 78% yield (621 mg). **1b**, **1f** and **1g** were also prepared according to the same procedure using the appropriate starting materials. All compounds were used without further purification except **1f** which was further purified by silica gel column chromatography prior to use. **1a**,<sup>1</sup> **1b**,<sup>2</sup> **1f**<sup>1</sup> and **1g**<sup>3</sup> are known compounds whose homogeneity and identify were confirmed by comparing its  $^1H$  NMR spectrum with literature.

**1c**,<sup>4</sup> **1d**<sup>5</sup> and **1e**<sup>5</sup> are all known compounds which were synthesized according to literature procedures.

### General Procedure for Cu-catalyzed C-H Arylation

To an 8-mL screw-capped reaction vial equipped with a magnetic stir bar, a mixture of CuI (20 mol%), 1,2,4-triazole (0.5 mmol), LiO<sup>t</sup>Bu (2.0 equiv.), DMEDA (20 mol%) and aryl bromide (3.0 equiv.) was mixed in dioxane (0.5 mL). The reaction mixture was then placed into a pre-heated oil bath at 140 °C with vigorous stirring. After 24 h, the reaction mixture was then allowed to cool to room temperature and passed through a short pad of celite with DCM washing. The crude reaction mixture was then dried over Na<sub>2</sub>SO<sub>4</sub> and concentrated under reduced pressure. Purification by silica gel chromatography (hexane: EtOAc) then gave the desired arylated product.

### Characterization Data for Arylated Products

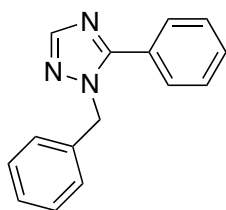

1-benzyl-5-phenyl-1*H*-1,2,4-triazole (**3aa**).<sup>6</sup> Off-white solid (62%, 72.5 mg); *R<sub>f</sub>* (2:1 hexane:EtOAc) = 0.37; m.p 83 – 86 °C; <sup>1</sup>H NMR (400 MHz, CDCl<sub>3</sub>): δ 5.43 (s, 2H), 7.15 – 7.16 (m, 2H), 7.30 – 7.36 (m, 3H), 7.44 – 7.49 (m, 3H), 7.57 – 7.60 (m, 2H), 8.03 (s, 1H); <sup>13</sup>C NMR (100 MHz, CDCl<sub>3</sub>): δ 52.8, 126.9, 127.9, 128.1, 128.8, 128.9, 129.0, 130.3, 135.9, 151.3; *v*<sub>max</sub> (KBr) 3066, 3029, 2959, 1606, 1483, 1454, 1390, 1289, 1234, 1184, 1132, 1074, 1014, 916, 788, 738 cm<sup>-1</sup>; HRMS (ESI) calcd for C<sub>15</sub>H<sub>14</sub>N<sub>3</sub> [M+H]: 236.1187, found: 236.1190.

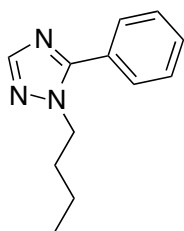

1-butyl-5-phenyl-1*H*-1,2,4-triazole (**3ba**). Light yellow oil (40%, 40.3 mg);  $R_f$  (2:1 hexane:EtOAc) = 0.37;  $^1\text{H}$  NMR (400 MHz,  $\text{CDCl}_3$ ):  $\delta$  0.88 (t,  $J = 7.5$  Hz, 3H), 1.25 – 1.32 (m, 2H), 1.83 – 1.89 (m, 2H), 4.20 (t,  $J = 7.5$  Hz, 2H), 7.49 – 7.52 (m, 3H), 7.60 – 7.62 (m, 2H), 7.95 (s, 1H);  $^{13}\text{C}$  NMR (100 MHz,  $\text{CDCl}_3$ ):  $\delta$  13.5, 19.7, 32.0, 49.0, 128.3, 128.7, 128.8, 130.0, 150.7;  $\nu_{\text{max}}$  (KBr) 3068, 2960, 2934, 2874, 1484, 1463, 1442, 1385, 1276, 1161, 1013, 922, 881, 777, 731, 699  $\text{cm}^{-1}$ ; HRMS (ESI) calcd for  $\text{C}_{12}\text{H}_{16}\text{N}_3$  [M+H]: 202.1344, found: 202.1348.

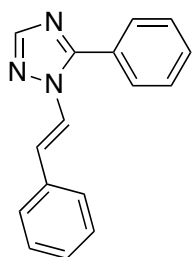

(*E*)-5-phenyl-1-styryl-1*H*-1,2,4-triazole (**3ca**). Yellow solid (50%, 61.7 mg);  $R_f$  (2:1 hexane:EtOAc) = 0.50; m.p 123 – 126  $^\circ\text{C}$ ;  $^1\text{H}$  NMR (400 MHz,  $\text{CDCl}_3$ ):  $\delta$  7.28 – 7.31 (m, 1H), 7.33 – 7.37 (m, 2H), 7.40 – 7.43 (m, 3H), 7.49 – 7.58 (m, 4H), 7.69 – 7.72 (m, 2H), 8.07 (s, 1H);  $^{13}\text{C}$  NMR (100 MHz,  $\text{CDCl}_3$ ):  $\delta$  121.9, 122.5, 126.7, 127.6, 128.4, 128.9, 129.1, 129.4, 130.6, 134.4, 151.6, 154.4;  $\nu_{\text{max}}$  (KBr) 3054, 1766, 1654, 1596, 1529, 1486, 1450, 1329, 1261, 1131, 1074, 1008, 941, 886, 775, 755  $\text{cm}^{-1}$ ; HRMS (ESI) calcd for  $\text{C}_{16}\text{H}_{14}\text{N}_3$  [M+H]: 248.1187, found: 248.1190.

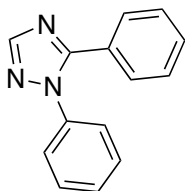

1,5-diphenyl-1*H*-1,2,4-triazole (**3da**). Off-white solid (43%, 47.3 mg);  $R_f$  (2:1 hexane:EtOAc) = 0.54; m.p 78 – 81 °C;  $^1\text{H}$  NMR (400 MHz,  $\text{CDCl}_3$ ):  $\delta$  7.32 – 7.44 (m, 8H), 7.48 – 7.50 (m, 2H), 8.10 (s, 1H);  $^{13}\text{C}$  NMR (100 MHz,  $\text{CDCl}_3$ ):  $\delta$  125.4, 127.6, 127.8, 128.6, 128.9, 129.0, 129.4, 130.1, 138.2, 151.6;  $\nu_{\text{max}}$  (KBr) 3085, 1598, 1558, 1501, 1440, 1383, 1290, 1200, 1139, 1069, 984, 915, 779, 721  $\text{cm}^{-1}$ ; HRMS (ESI) calcd for  $\text{C}_{14}\text{H}_{12}\text{N}_3$  [ $\text{M}+\text{H}$ ]: 222.1031, found: 222.1032.

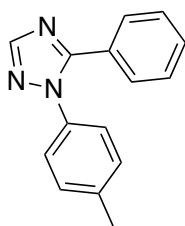

5-phenyl-1-(*p*-tolyl)-1*H*-1,2,4-triazole (**3ea**). Off-white solid (42%, 49.0 mg);  $R_f$  (2:1 hexane:EtOAc) = 0.47; m.p 63 – 65 °C;  $^1\text{H}$  NMR (400 MHz,  $\text{CDCl}_3$ ):  $\delta$  2.41 (s, 3H), 7.20 – 7.25 (m, 4H), 7.32 – 7.36 (m, 2H), 7.37 – 7.41 (m, 1H), 7.49 – 7.51 (m, 2H), 8.08 (s, 1H);  $^{13}\text{C}$  NMR (100 MHz,  $\text{CDCl}_3$ ):  $\delta$  21.2, 125.2, 127.9, 128.6, 128.9, 129.97, 130.01, 135.8, 139.1, 151.5, 153.8;  $\nu_{\text{max}}$  (KBr) 3037, 2920, 1600, 1560, 1514, 1487, 1455, 1381, 1266, 1203, 1136, 1107, 1065, 985, 897, 823, 781, 721  $\text{cm}^{-1}$ ; HRMS (ESI) calcd for  $\text{C}_{15}\text{H}_{14}\text{N}_3$  [ $\text{M}+\text{H}$ ]: 236.1187, found: 236.1190.

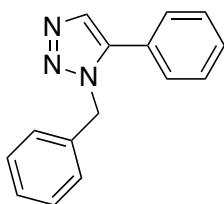

1-benzyl-5-phenyl-1*H*-1,2,3-triazole (**3fa**).<sup>7</sup> Off-white solid (22%, 25.4 mg);  $R_f$  (2:1 hexane:EtOAc) = 0.37; m.p 75 – 78 °C;  $^1\text{H}$  NMR (400 MHz,  $\text{CDCl}_3$ ):  $\delta$  5.55 (s, 2H), 7.06 – 7.09 (m, 2H), 7.24 – 7.30 (m, 5H), 7.40 – 7.44 (m, 3H), 7.75 (s, 1H);  $^{13}\text{C}$  NMR (100 MHz,  $\text{CDCl}_3$ ):  $\delta$  51.9, 127.0, 127.2, 128.2, 128.9, 128.95, 128.98, 129.5, 133.4, 135.6;  $\nu_{\text{max}}$  (KBr) 3060, 3033, 2962, 1603, 1479, 1453, 1434, 1365, 1233, 1208, 1127, 1113, 1076, 827, 769, 740, 719, 701  $\text{cm}^{-1}$ ; HRMS (ESI) calcd for  $\text{C}_{15}\text{H}_{14}\text{N}_3$  [ $\text{M}+\text{H}$ ]: 236.1187, found: 236.1189.

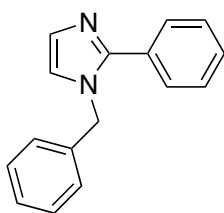

1-benzyl-2-phenyl-1*H*-imidazole (**3ga**). Yellow oil (24%, 28.6 mg);  $R_f$  (2:1 hexane:EtOAc) = 0.20;  $^1\text{H}$  NMR (400 MHz,  $\text{CDCl}_3$ ):  $\delta$  5.21 (s, 2H), 6.97 (s, 1H), 7.08 (d,  $J = 7.2$  Hz, 2H), 7.19(s, 1H), 7.28 – 7.40 (m, 6H), 7.54 (s, 2H);  $^{13}\text{C}$  NMR (100 MHz,  $\text{CDCl}_3$ ):  $\delta$  50.4, 121.2, 126.6, 127.9, 128.6, 128.8, 128.9, 129.0, 130.4, 136.9, 148.2;  $\nu_{\text{max}}$  (KBr) 3065, 3033, 2933, 1605, 1498, 1473, 1454, 1417, 1359, 1277, 1128, 1075, 1019, 914, 772, 729, 699  $\text{cm}^{-1}$ ; HRMS (ESI) calcd for  $\text{C}_{16}\text{H}_{15}\text{N}_2$  [ $\text{M}+\text{H}$ ]: 235.1235, found: 235.1237.



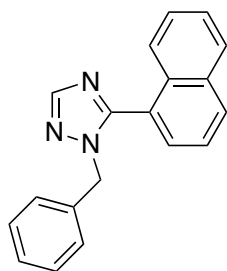

1-benzyl-5-(naphthalene-1-yl)-1*H*-1,2,4-triazole (**3ab**). Light tan solid (65%, 93.4 mg);  $R_f$  (2:1 hexane:EtOAc) = 0.46; m.p 60 – 64 °C;  $^1\text{H}$  NMR (400 MHz,  $\text{CDCl}_3$ ):  $\delta$  5.19 (s, 2H), 6.99 – 7.01 (m, 2H), 7.22 – 7.26 (m, 3H), 7.44 – 7.57 (m, 4H), 7.63 (d,  $J$  = 8.4 Hz, 1H), 7.93 (d,  $J$  = 8.0 Hz, 1H), 8.01 (d,  $J$  = 8.0 Hz, 1H), 8.16 (s, 1H);  $^{13}\text{C}$  NMR (100 MHz,  $\text{CDCl}_3$ ):  $\delta$  52.7, 124.9, 125.0, 125.5, 126.6, 127.4, 127.6, 128.1, 128.46, 128.47, 128.7, 130.8, 131.8, 133.6, 135.5, 151.5, 154.0;  $\nu_{\text{max}}$  (KBr) 3033, 2939, 1594, 1497, 1469, 1455, 1379, 1275, 1177, 1086, 976, 894, 803, 779, 723  $\text{cm}^{-1}$ ; HRMS (ESI) calcd for  $\text{C}_{19}\text{H}_{16}\text{N}_3$  [ $\text{M}+\text{H}$ ]: 286.1344, found: 286.1346.

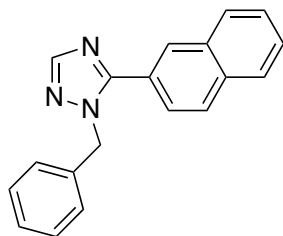

1-benzyl-5-(naphthalene-2-yl)-1*H*-1,2,4-triazole (**3ac**). Off-white solid (74%, 105.9 mg);  $R_f$  (2:1 hexane:EtOAc) = 0.43; m.p 124 – 127 °C;  $^1\text{H}$  NMR (400 MHz,  $\text{CDCl}_3$ ):  $\delta$  5.51 (s, 2H), 7.21 – 7.23 (m, 2H), 7.33 – 7.39 (m, 3H), 7.54 – 7.59 (m, 2H), 7.71 (dd,  $J_1$  = 8.6 Hz,  $J_2$  = 1.8 Hz, 1H), 7.80 – 7.82 (m, 1H), 7.88 – 7.90 (m, 1H), 7.94 (d,  $J$  = 8.8 Hz, 1H), 8.05 (s, 1H), 8.08 (s, 1H);  $^{13}\text{C}$  NMR (100 MHz,  $\text{CDCl}_3$ ):  $\delta$  53.0, 125.2, 125.5, 126.9, 127.0, 127.5, 127.9, 128.2, 128.5, 128.8, 128.9, 129.0, 132.8, 133.8, 136.0, 151.4, 155.3;  $\nu_{\text{max}}$  (KBr) 3063, 3028, 2956, 1603, 1498, 1475, 1454, 1430, 1367, 1286, 1183, 1116, 1029, 865, 830, 753, 725  $\text{cm}^{-1}$ ; HRMS (ESI) calcd for  $\text{C}_{19}\text{H}_{16}\text{N}_3$  [ $\text{M}+\text{H}$ ]: 286.1344, found: 286.1347.

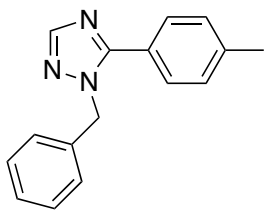

1-benzyl-5-(*p*-tolyl)-1*H*-1,2,4-triazole (**3ad**). Off-white solid (60%, 75.2 mg);  $R_f$  (2:1 hexane:EtOAc) = 0.43; m.p 59 – 60 °C;  $^1\text{H}$  NMR (400 MHz,  $\text{CDCl}_3$ ):  $\delta$  2.40 (s, 3H), 5.42 (s, 2H), 7.15 – 7.16 (m, 2H), 7.25 – 7.27 (m, 2H), 7.30 – 7.34 (m, 3H), 7.47 – 7.49 (m, 2H), 8.01 (s, 1H);  $^{13}\text{C}$  NMR (100 MHz,  $\text{CDCl}_3$ ):  $\delta$  21.4, 52.7, 125.0, 126.9, 128.1, 128.6, 128.9, 129.6, 136.0, 140.5, 151.3, 155.4;  $\nu_{\text{max}}$  (KBr) 3025, 2919, 1615, 1491, 1462, 1387, 1272, 1232, 1179, 1124, 1080, 1033, 1015, 903, 877, 824, 784, 732, 696  $\text{cm}^{-1}$ ; HRMS (ESI) calcd for  $\text{C}_{16}\text{H}_{16}\text{N}_3$  [M+H]: 250.1344, found: 250.1345.

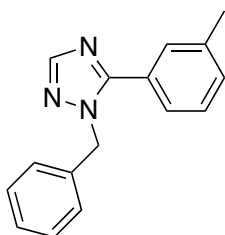

1-benzyl-5-(*m*-tolyl)-1*H*-1,2,4-triazole (**3ae**). Off-white solid (66%, 82.6 mg);  $R_f$  (2:1 hexane:EtOAc) = 0.46; m.p 51 – 54 °C;  $^1\text{H}$  NMR (400 MHz,  $\text{CDCl}_3$ ):  $\delta$  2.35 (s, 3H), 5.40 (s, 2H), 7.15 – 7.16 (m, 2H), 7.28 – 7.35 (m, 6H), 7.41 (s, 1H), 8.00 (s, 1H);  $^{13}\text{C}$  NMR (100 MHz,  $\text{CDCl}_3$ ):  $\delta$  21.2, 52.7, 125.5, 126.9, 127.7, 128.0, 128.6, 128.8, 129.5, 130.9, 135.9, 138.7, 151.1, 155.3;  $\nu_{\text{max}}$  (KBr) 3108, 3028, 1584, 1524, 1492, 1452, 1372, 1274, 1249, 1184, 1123, 1074, 1035, 919, 896, 806, 741  $\text{cm}^{-1}$ ; HRMS (ESI) calcd for  $\text{C}_{16}\text{H}_{16}\text{N}_3$  [M+H]: 250.1344, found: 250.1347.

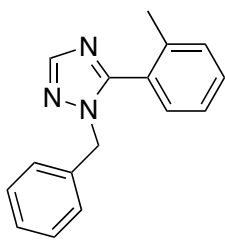

1-benzyl-5-(*o*-tolyl)-1*H*-1,2,4-triazole (**3af**). Off-white solid (60%, 74.2 mg);  $R_f$  (2:1 hexane:EtOAc) = 0.46; m.p 40 – 44 °C;  $^1\text{H}$  NMR (400 MHz,  $\text{CDCl}_3$ ):  $\delta$  2.09 (s, 3H), 5.17 (s, 2H), 7.03 – 7.06 (m, 2H), 7.19 – 7.31 (m, 6H), 7.38 – 7.42 (m, 1H), 8.03 (s, 1H);  $^{13}\text{C}$  NMR (100 MHz,  $\text{CDCl}_3$ ):  $\delta$  19.5, 52.5, 125.9, 127.7, 127.8, 128.2, 128.7, 129.7, 130.3, 130.7, 135.5, 138.2, 151.1, 154.7;  $\nu_{\text{max}}$  (KBr) 3030, 1605, 1530, 1453, 1385, 1364, 1273, 1229, 1184, 1136, 1113, 1075, 1015, 917, 885, 774, 749, 716  $\text{cm}^{-1}$ ; HRMS (ESI) calcd for  $\text{C}_{16}\text{H}_{16}\text{N}_3$  [M+H]: 250.1344, found: 250.1347.

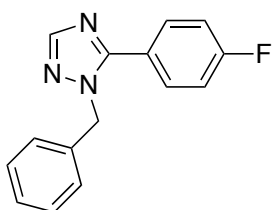

1-benzyl-5-(2-methoxyphenyl)-1*H*-1,2,4-triazole (**3ag**). Light yellow oil (60%, 75.4 mg);  $R_f$  (2:1 hexane:EtOAc) = 0.40;  $^1\text{H}$  NMR (400 MHz,  $\text{CDCl}_3$ ):  $\delta$  5.39 (s, 2H), 7.10 – 7.14 (m, 4H), 7.28 – 7.34 (m, 3H), 7.53 – 7.56 (m, 2H), 7.99 (s, 1H);  $^{13}\text{C}$  NMR (100 MHz,  $\text{CDCl}_3$ ):  $\delta$  52.7, 116.0 (d,  $J = 21.7$  Hz), 123.9 (d,  $J = 3.3$  Hz), 126.7, 128.1, 128.9, 130.8 (d,  $J = 6.8$  Hz), 135.6, 151.1, 154.2, 163.7 (d,  $J = 249.8$  Hz);  $\nu_{\text{max}}$  (KBr) 3066, 3034, 2939, 1609, 1486, 1463, 1381, 1275, 1229, 1160, 1123, 1028, 1013, 844, 729  $\text{cm}^{-1}$ ; HRMS (ESI) calcd for  $\text{C}_{15}\text{H}_{13}\text{FN}_3$  [M+H]: 254.1093, found: 254.1095.

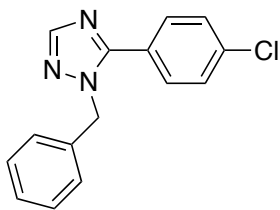

1-benzyl-5-(4-chlorophenyl)-1*H*-1,2,4-triazole (**3ah**). Light yellow solid (63%, 84.9 mg);  $R_f$  (2:1 hexane:EtOAc) = 0.41; m.p 75 – 78 °C;  $^1\text{H}$  NMR (400 MHz,  $\text{CDCl}_3$ ):  $\delta$  5.42 (s, 2H), 7.13 – 7.15 (m, 2H), 7.31 – 7.37 (m, 3H), 7.42 – 7.44 (m, 2H), 7.50 – 7.53 (m, 2H), 8.02 (s, 1H);  $^{13}\text{C}$  NMR (100 MHz,  $\text{CDCl}_3$ ):  $\delta$  52.9, 126.3, 126.8, 128.3, 129.1, 129.2, 130.1, 135.6, 136.2, 151.4, 154.2;  $\nu_{\text{max}}$  (KBr) 3070, 3011, 2934, 1601, 1488, 1457, 1409, 1375, 1286, 1245, 1186, 1094, 1010, 905, 835, 732, 696  $\text{cm}^{-1}$ ; HRMS (ESI) calcd for  $\text{C}_{15}\text{H}_{13}\text{ClN}_3$   $[\text{M}+\text{H}]$ : 270.0798, found: 270.0797.

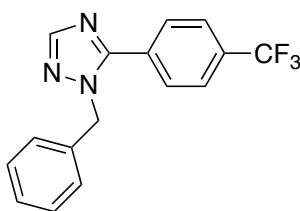

1-benzyl-5-(4-(trifluoromethyl)phenyl)-1*H*-1,2,4-triazole (**3ai**). Off-white solid (46%, 70.4 mg);  $R_f$  (2:1 hexane:EtOAc) = 0.51; m.p 44 – 46 °C;  $^1\text{H}$  NMR (400 MHz,  $\text{CDCl}_3$ ):  $\delta$  5.45 (s, 2H), 7.14 – 7.16 (m, 2H), 7.32 – 7.38 (m, 3H), 7.72 (s, 4H), 8.07 (s, 1H);  $^{13}\text{C}$  NMR (100 MHz,  $\text{CDCl}_3$ ):  $\delta$  53.0, 122.3, 125.0, 125.9 (q,  $J$  = 3.7 Hz), 126.8, 127.8, 128.4, 129.1, 129.2, 131.4, 132.2 (q,  $J$  = 32.8 Hz), 135.5, 151.5;  $\nu_{\text{max}}$  (KBr) 3069, 3033, 2963, 1622, 1544, 1455, 1440, 1384, 1328, 1241, 1131, 1071, 1030, 900, 846, 754, 720  $\text{cm}^{-1}$ ; HRMS (ESI) calcd for  $\text{C}_{16}\text{H}_{13}\text{F}_3\text{N}_3$   $[\text{M}+\text{H}]$ : 304.1061, found: 304.1063.

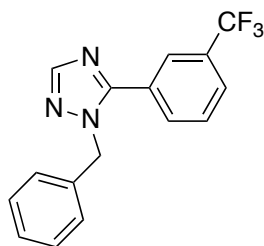

1-benzyl-5-(3-(trifluoromethyl)phenyl)-1*H*-1,2,4-triazole (**3aj**). Off-white solid (55%, 83.9 mg);  $R_f$  (2:1 hexane:EtOAc) = 0.43; m.p 50 – 52 °C;  $^1\text{H}$  NMR (400 MHz,  $\text{CDCl}_3$ ):  $\delta$  5.43 (s, 2H), 7.17 – 7.19 (m, 2H), 7.32 – 7.38 (m, 3H), 7.59 (t,  $J$  = 7.8 Hz, 1H), 7.73 – 7.78 (m, 2H), 7.85 (s, 1H), 8.06 (s, 1H);  $^{13}\text{C}$  NMR (100 MHz,  $\text{CDCl}_3$ ):  $\delta$  53.1, 122.3, 124.9, 125.8 (q,  $J$  = 3.8 Hz), 126.9, 127.0, 128.4, 128.8, 129.1, 129.5, 131.3, 131.7, 132.0, 135.4, 151.4, 153.8;  $\nu_{\text{max}}$  (KBr) 3073, 2934, 1622, 1498, 1457, 1375, 1323, 1276, 1130, 1034, 916, 889, 815, 771, 743, 724  $\text{cm}^{-1}$ ; HRMS (ESI) calcd for  $\text{C}_{16}\text{H}_{13}\text{F}_3\text{N}_3$  [ $\text{M}+\text{H}$ ]: 304.1061, found: 304.1063.

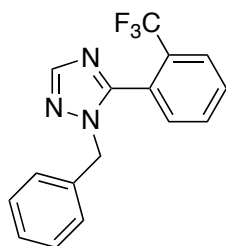

1-benzyl-5-(2-(trifluoromethyl)phenyl)-1*H*-1,2,4-triazole (**3ak**). Yellow solid (31%, 47.1 mg);  $R_f$  (2:1 hexane:EtOAc) = 0.38; m.p 86 – 89 °C;  $^1\text{H}$  NMR (400 MHz,  $\text{CDCl}_3$ ):  $\delta$  5.13 (s, 2H), 7.04 – 7.06 (m, 2H), 7.25 – 7.29 (m, 4H), 7.59 (t,  $J$  = 7.4 Hz, 1H), 7.66 (t,  $J$  = 7.6 Hz, 1H), 7.84 (d,  $J$  = 7.6 Hz, 1H), 8.04 (s, 1H);  $^{13}\text{C}$  NMR (100 MHz,  $\text{CDCl}_3$ ):  $\delta$  52.8, 121.9, 124.7, 126.9 (q,  $J$  = 4.8 Hz), 127.8, 128.3, 128.8, 130.1, 130.4, 130.7, 131.8, 132.0, 135.0, 151.2;  $\nu_{\text{max}}$  (KBr) 3068, 3030, 2988, 1605, 1478, 1464, 1362, 1315, 1274, 1229, 1169, 1131, 1065, 1033, 980, 875, 780, 726  $\text{cm}^{-1}$ ; HRMS (ESI) calcd for  $\text{C}_{16}\text{H}_{13}\text{F}_3\text{N}_3$  [ $\text{M}+\text{H}$ ]: 304.1061, found: 304.1062.

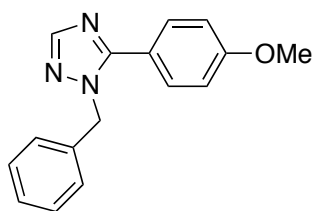

1-benzyl-5-(4-methoxyphenyl)-1*H*-1,2,4-triazole (**3al**). Light tan solid (56%, 74.8 mg);  $R_f$  (2:1 hexane:EtOAc) = 0.26; m.p 79 – 82 °C;  $^1\text{H}$  NMR (400 MHz,  $\text{CDCl}_3$ ):  $\delta$  3.84 (s, 3H), 5.42 (s, 2H), 6.95 – 6.97 (m, 2H), 7.15 – 7.16 (m, 2H), 7.30 – 7.37 (m, 3H), 7.51 – 7.53 (m, 2H), 8.00 (s, 1H);  $^{13}\text{C}$  NMR (100 MHz,  $\text{CDCl}_3$ ):  $\delta$  52.7, 55.4, 114.3, 120.2, 126.8, 128.1, 129.0, 130.2, 136.0, 151.2, 155.2, 161.1;  $\nu_{\text{max}}$  (KBr) 3065, 3034, 3005, 2957, 2833, 1611, 1577, 1540, 1472, 1378, 1254, 1178, 1124, 1022, 899, 834, 751, 713  $\text{cm}^{-1}$ ; HRMS (ESI) calcd for  $\text{C}_{16}\text{H}_{16}\text{N}_3\text{O}$  [M+H]: 266.1293, found: 266.1292.

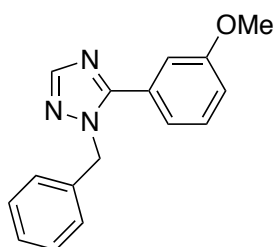

1-benzyl-5-(3-methoxyphenyl)-1*H*-1,2,4-triazole (**3am**). Yellow oil (61%, 81.2 mg);  $R_f$  (2:1 hexane:EtOAc) = 0.37;  $^1\text{H}$  NMR (400 MHz,  $\text{CDCl}_3$ ):  $\delta$  3.73 (s, 3H), 5.43 (s, 2H), 7.00 – 7.02 (m, 1H), 7.11 – 7.16 (m, 4H), 7.29 – 7.36 (m, 4H), 8.02 (s, 1H);  $^{13}\text{C}$  NMR (100 MHz,  $\text{CDCl}_3$ ):  $\delta$  52.7, 55.3, 113.7, 116.6, 120.8, 126.8, 128.0, 128.9, 129.0, 129.9, 135.9, 151.2, 155.1, 159.8;  $\nu_{\text{max}}$  (KBr) 3065, 3032, 2939, 2836, 1607, 1584, 1496, 1377, 1288, 1262, 1221, 1181, 1123, 1049, 1028, 864, 792, 739, 728  $\text{cm}^{-1}$ ; HRMS (ESI) calcd for  $\text{C}_{16}\text{H}_{16}\text{N}_3\text{O}$  [M+H]: 266.1293, found: 266.1294.

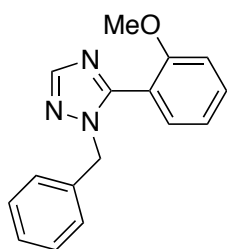

1-benzyl-5-(2-methoxyphenyl)-1*H*-1,2,4-triazole (**3an**). Off-white solid (43%, 56.7 mg);  $R_f$  (2:1 hexane:EtOAc) = 0.28; m.p 68 – 71 °C;  $^1\text{H}$  NMR (400 MHz,  $\text{CDCl}_3$ ):  $\delta$  3.69 (s, 3H), 5.21 (s, 2H), 6.98 (d,  $J$  = 8.4 Hz, 1H), 7.02 – 7.08 (m, 3H), 7.24 – 7.29 (m, 3H), 7.37 (dd,  $J_1$  = 7.6 Hz,  $J_2$  = 1.6 Hz, 1H), 7.45 – 7.49 (m, 1H), 8.02 (s, 1H);  $^{13}\text{C}$  NMR (100 MHz,  $\text{CDCl}_3$ ):  $\delta$  42.8, 55.4, 111.2, 117.4, 121.0, 127.6, 127.8, 128.6, 131.8, 132.0, 135.9, 151.5, 152.9, 157.1;  $\nu_{\text{max}}$  (KBr) 3014, 2968, 2936, 1781, 1583, 1449, 1381, 1251, 1182, 1104, 1010, 893, 804, 766, 730  $\text{cm}^{-1}$ ; HRMS (ESI) calcd for  $\text{C}_{16}\text{H}_{16}\text{N}_3\text{O}$  [M+H]: 266.1293, found: 266.1294.

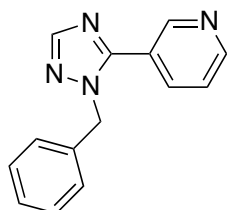

3-(1-benzyl-1*H*-1,2,4-triazol-5-yl)pyridine (**3ao**). Yellow solid (34%, 40.7 mg);  $R_f$  (1:1 hexane:EtOAc) = 0.18; m.p 54 – 57 °C;  $^1\text{H}$  NMR (400 MHz,  $\text{CDCl}_3$ ):  $\delta$  5.45 (s, 2H), 7.13 – 7.15 (m, 2H), 7.31 – 7.36 (m, 3H), 7.38 – 7.42 (m, 1H), 7.90 (dt,  $J_1$  = 8.0 Hz,  $J_2$  = 2.0 Hz, 1H), 8.07 (s, 1H), 8.72 (d,  $J$  = 3.6 Hz, 1H), 8.84 (s, 1H);  $^{13}\text{C}$  NMR (100 MHz,  $\text{CDCl}_3$ ):  $\delta$  53.1, 123.6, 124.4, 126.8, 128.4, 129.1, 135.4, 136.2, 149.2, 151.2, 151.6, 152.5;  $\nu_{\text{max}}$  (KBr) 3065, 3027, 2976, 2935, 1598, 1570, 1489, 1456, 1420, 1379, 1307, 1281, 1196, 1127, 1015, 897, 813, 732, 704  $\text{cm}^{-1}$ ; HRMS (ESI) calcd for  $\text{C}_{14}\text{H}_{13}\text{N}_4$  [M+H]: 237.1140, found: 237.1143.

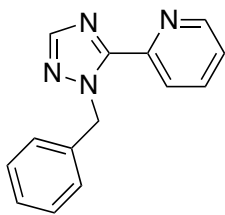

2-(1-benzyl-1*H*-1,2,4-triazol-5-yl)pyridine (**3ap**). Off-white solid (71%, 83.4 mg);  $R_f$  (2:1 hexane:EtOAc) = 0.39; m.p 65 – 67 °C;  $^1\text{H}$  NMR (400 MHz,  $\text{CDCl}_3$ ):  $\delta$  6.13 (s, 2H), 7.22 – 7.36 (m, 6H), 7.82 (td,  $J_1 = 7.8$  Hz,  $J_2 = 1.6$  Hz, 1H), 7.98 (s, 1H), 8.23 (d,  $J = 8.0$  Hz, 1H), 8.69 (s, 1H);  $^{13}\text{C}$  NMR (100 MHz,  $\text{CDCl}_3$ ):  $\delta$  54.1, 123.9, 124.3, 127.8, 128.0, 128.6, 136.7, 137.1, 147.9, 148.8, 150.8, 151.5;  $\nu_{\text{max}}$  (KBr) 3098, 2961, 1604, 1585, 1453, 1418, 1320, 1278, 1191, 1139, 1090, 1030, 996, 920, 796, 703  $\text{cm}^{-1}$ ; HRMS (ESI) calcd for  $\text{C}_{14}\text{H}_{13}\text{N}_4$  [M+H]: 237.1140, found: 237.1142.

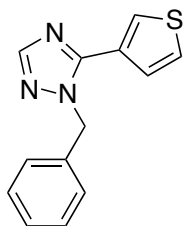

1-benzyl-5-(thiophen-3-yl)-1*H*-1,2,4-triazole (**3aq**). Light tan oil (45%, 53.8 mg);  $R_f$  (2:1 hexane:EtOAc) = 0.43;  $^1\text{H}$  NMR (400 MHz,  $\text{CDCl}_3$ ):  $\delta$  5.50 (s, 2H), 7.11 – 7.15 (m, 2H), 7.30 – 7.37 (m, 3H), 7.39 – 7.41 (m, 2H), 7.56 – 7.57 (m, 1H), 7.99 (s, 1H);  $^{13}\text{C}$  NMR (100 MHz,  $\text{CDCl}_3$ ):  $\delta$  52.8, 126.48, 126.52, 126.9, 127.5, 128.1, 128.3, 129.1, 135.7, 150.9, 151.1;  $\nu_{\text{max}}$  (KBr) 3104, 3032, 2953, 1571, 1496, 1454, 1409, 1341, 1307, 1272, 1183, 1121, 1076, 1030, 975, 893, 861, 793, 727  $\text{cm}^{-1}$ ; HRMS (ESI) calcd for  $\text{C}_{13}\text{H}_{12}\text{N}_3\text{S}$  [M+H]: 242.0752, found: 242.0754.



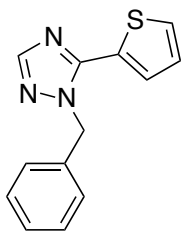

1-benzyl-5-(thiophen-2-yl)-1*H*-1,2,4-triazole (**3ar**). Light yellow oil (56%, 67.3 mg);  $R_f$  (2:1 hexane:EtOAc) = 0.47;  $^1\text{H}$  NMR (400 MHz,  $\text{CDCl}_3$ ):  $\delta$  5.57 (s, 2H), 7.06 – 7.08 (m, 1H), 7.15 – 7.17 (m, 2H), 7.29 – 7.37 (m, 4H), 7.46 – 7.48 (m, 1H), 7.98 (s, 1H);  $^{13}\text{C}$  NMR (100 MHz,  $\text{CDCl}_3$ ):  $\delta$  53.0, 126.6, 127.9, 128.1, 128.3, 128.9, 129.0, 135.4, 149.5, 151.2;  $\nu_{\text{max}}$  (KBr) 3107, 3033, 2937, 1605, 1568, 1455, 1474, 1386, 1330, 1279, 1231, 1180, 1114, 982, 853, 729  $\text{cm}^{-1}$ ; HRMS (ESI) calcd for  $\text{C}_{13}\text{H}_{12}\text{N}_3\text{S}$  [ $\text{M}+\text{H}$ ]: 242.0752, found: 242.0754.

## References

1. J. Doiron, A. H. Saultan, R. Richard, M. M. Touré, N. Picot, R. Richard, M. Čuperlović-Culf, G. A. Robichaud and M. Touaibia, *Eur. J. Med. Chem.*, 2011, **46**, 4010.
2. Y. R. Mirzaei, B. Twamley and J. n. M. Shreeve, *J. Org. Chem.*, 2002, **67**, 9340.
3. R. Salvio, R. Cacciapaglia and L. Mandolini, *J. Org. Chem.*, 2011, **76**, 5438.
4. M. Taillefer, A. Ouali, B. Renard and J.-F. Spindler, *Chem. Eur. J.*, 2006, **12**, 5301.
5. N. Kommu, V. D. Ghule, A. S. Kumar and A. K. Sahoo, *Chem. Asian J.*, 2014, **9**, 166.
6. K. B. Jørgensen, R. B. Olsen and P. H. J. Carlsen, *Molecules*, 2001, **6**, 481.
7. Y. Wang, J. Li, Y. He, Y. Xie, H. Wang and Y. Pan, *Adv. Synth. Catal.*, 2015, **357**, 3229.

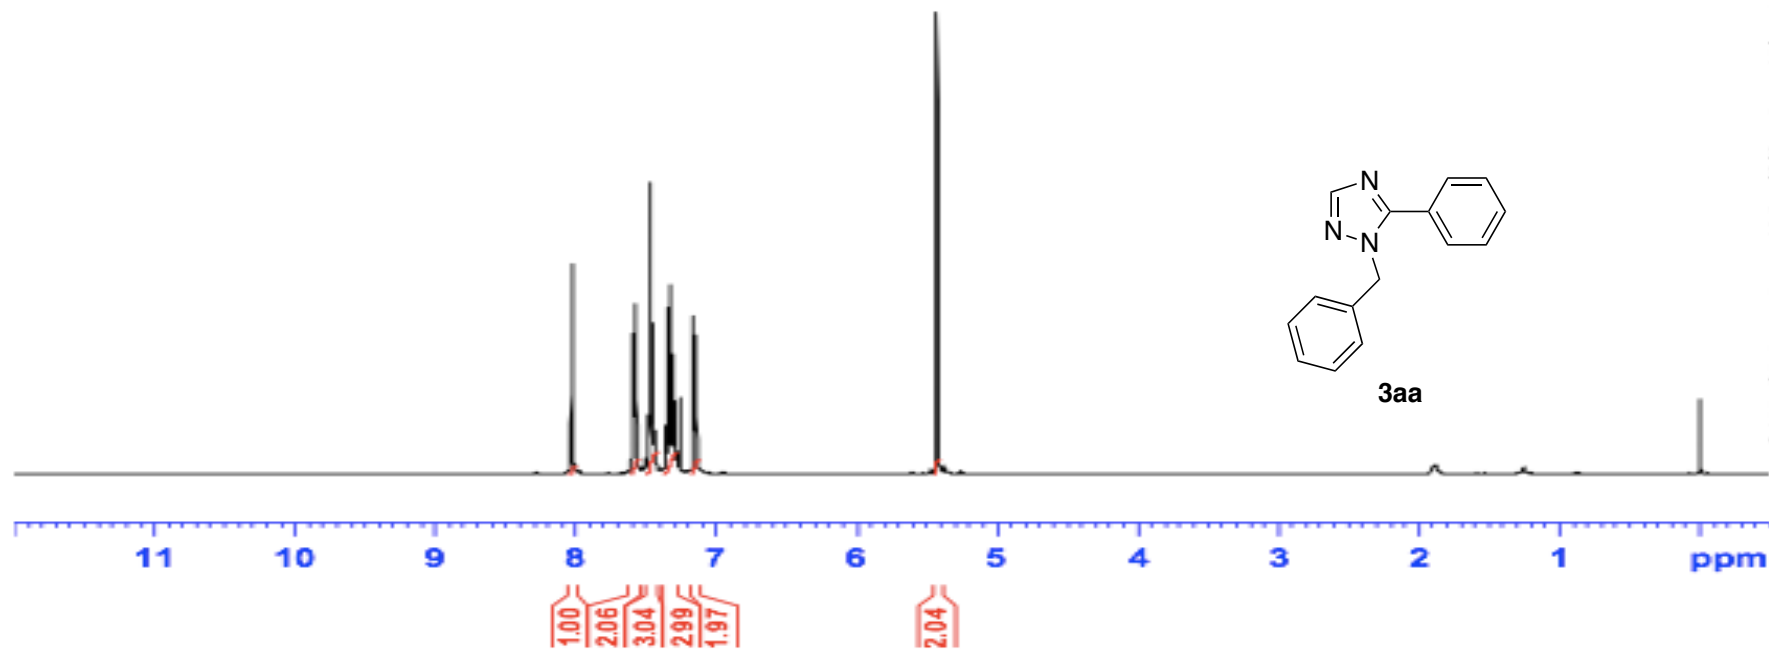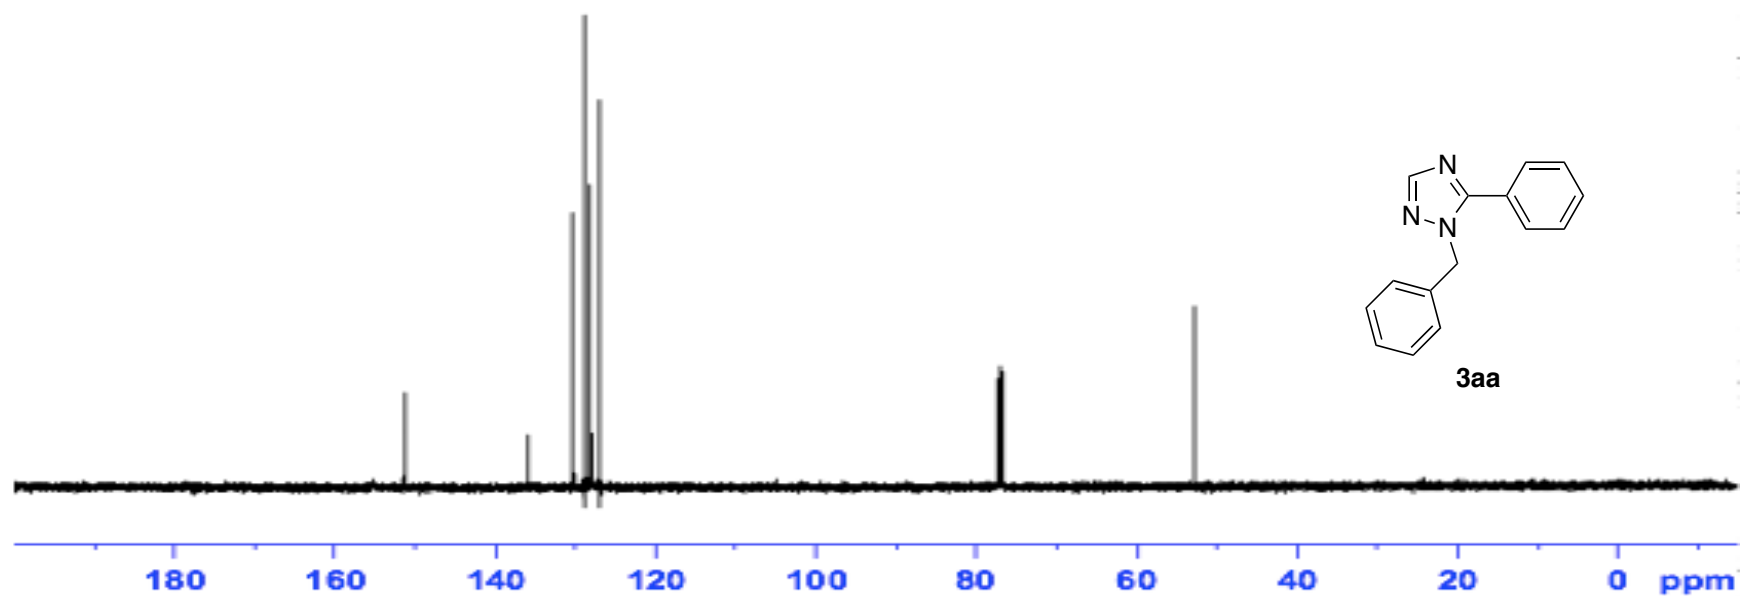

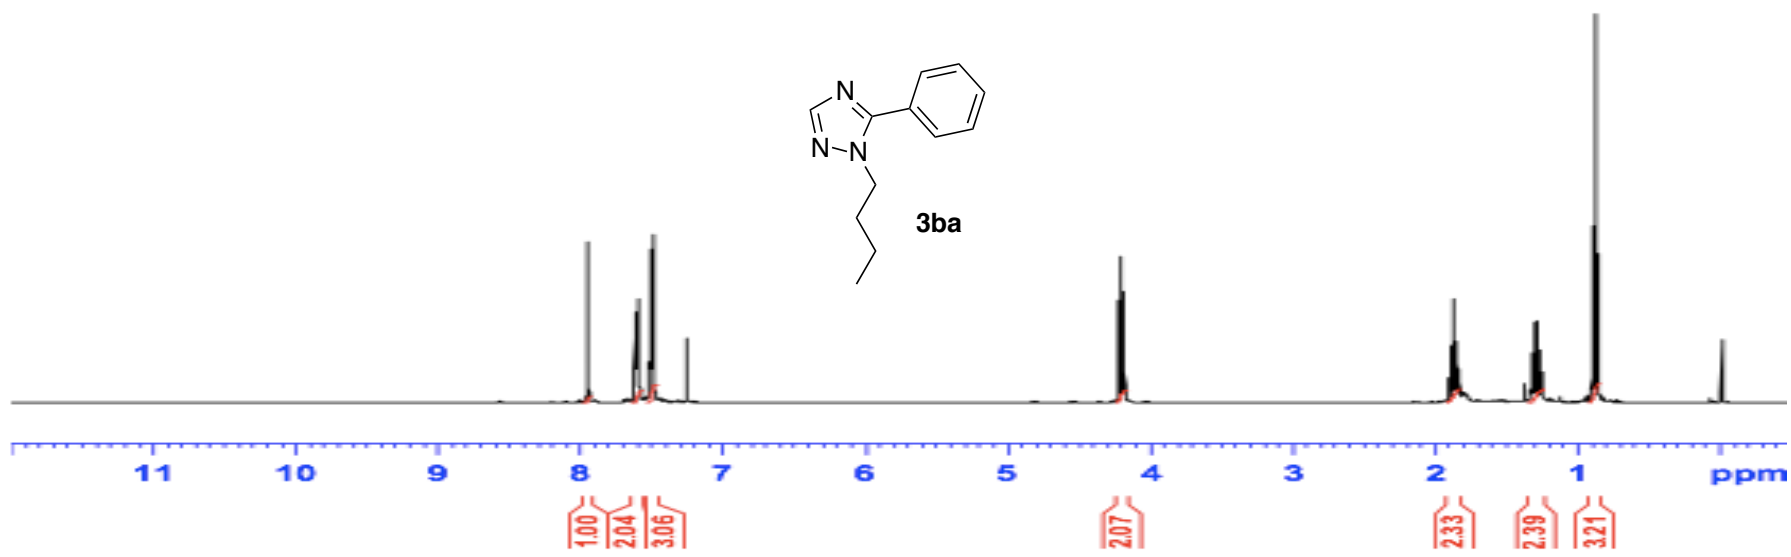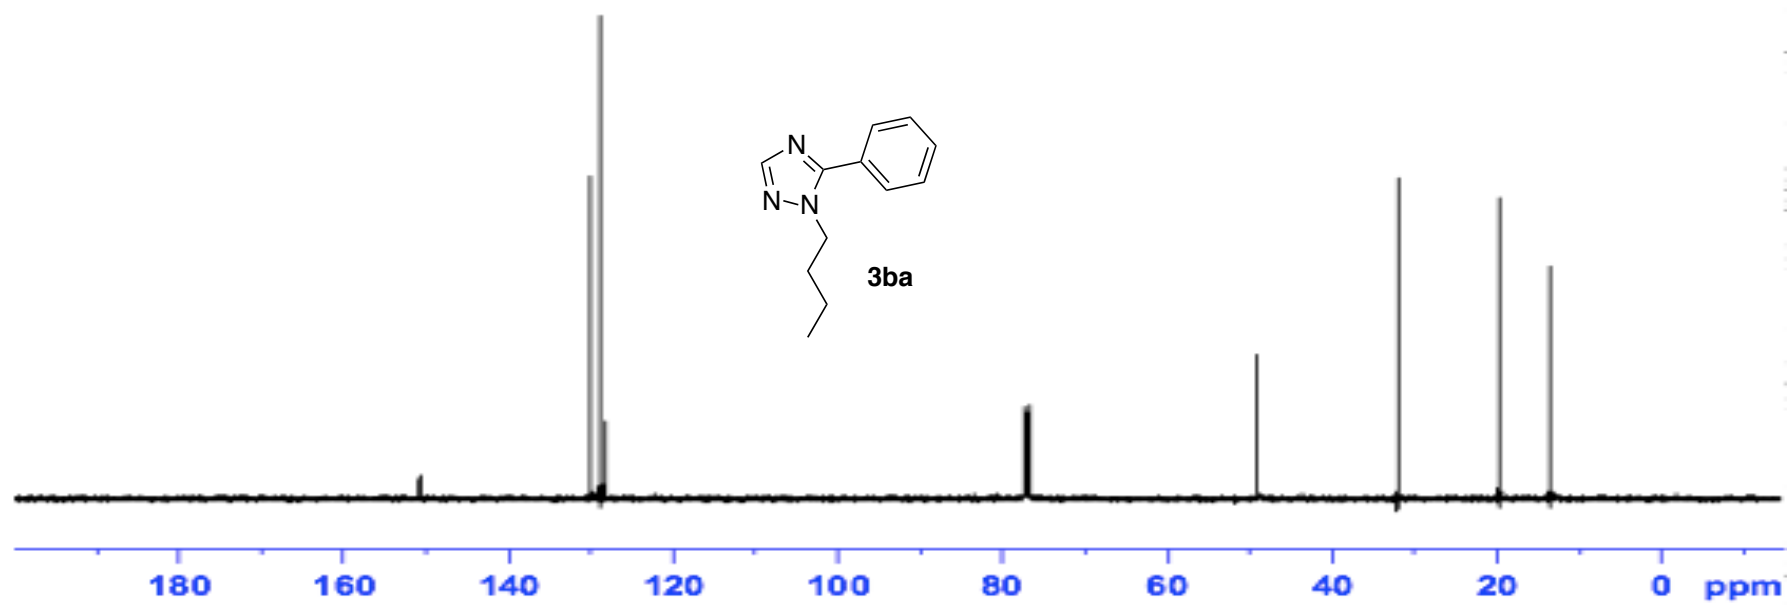

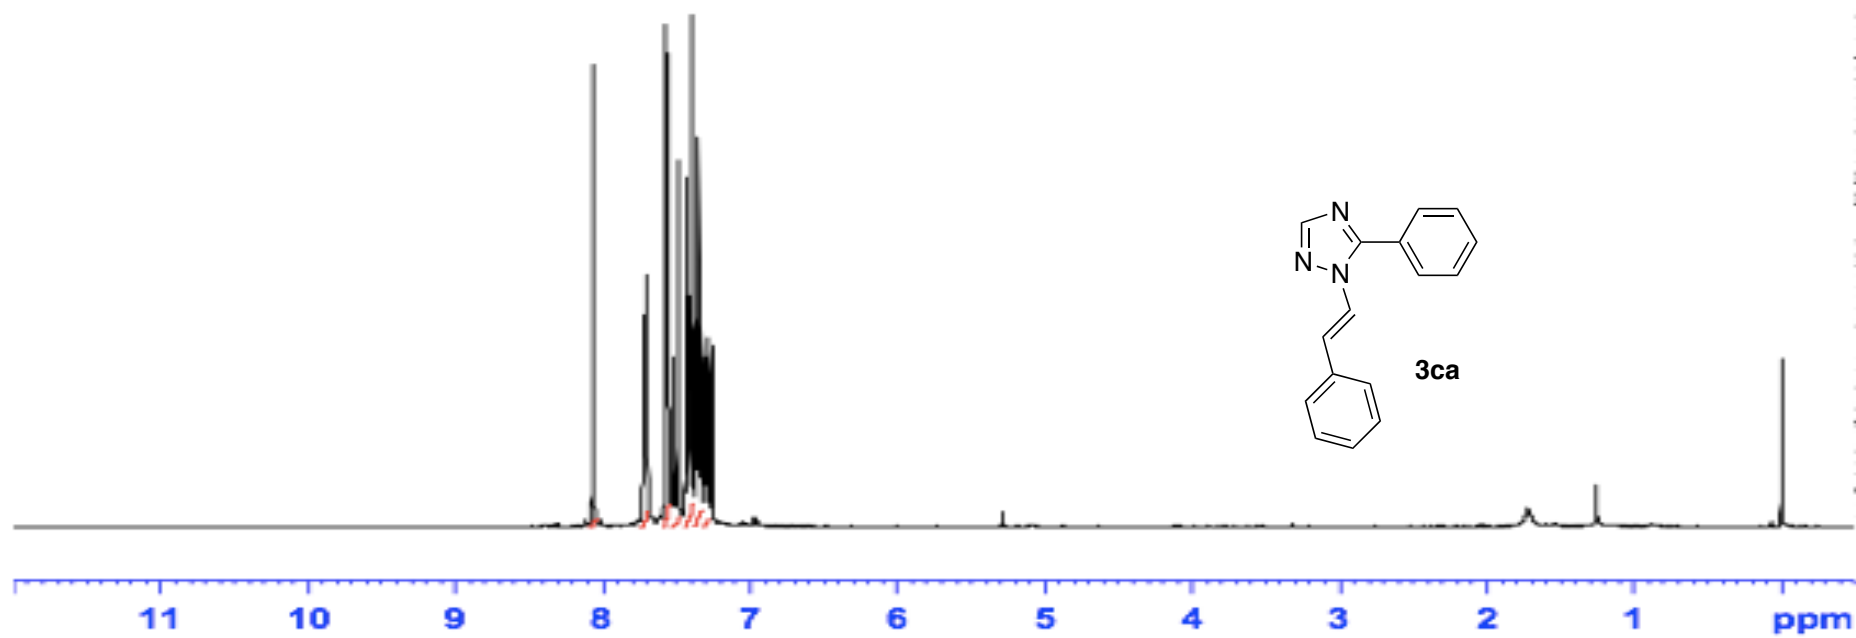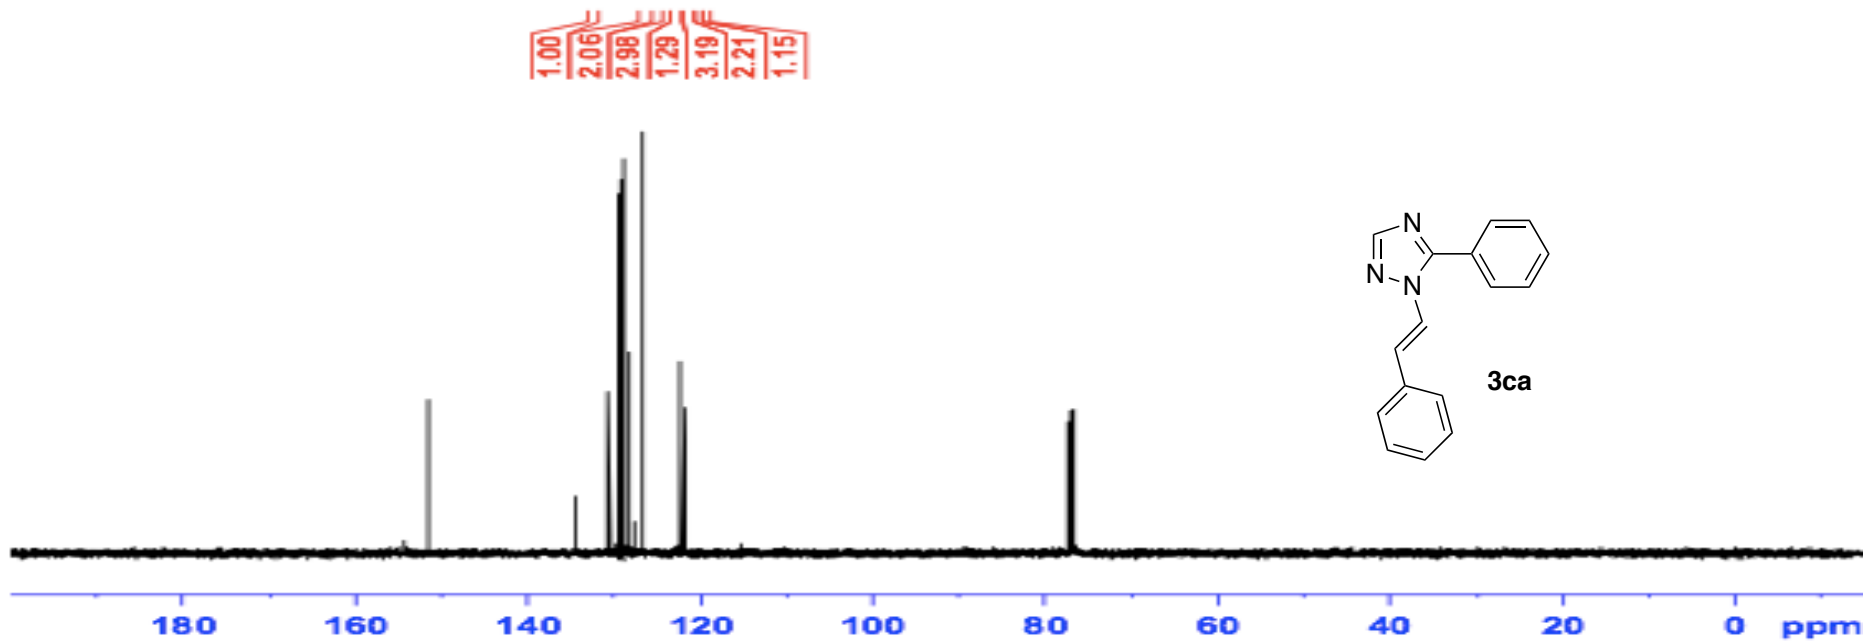

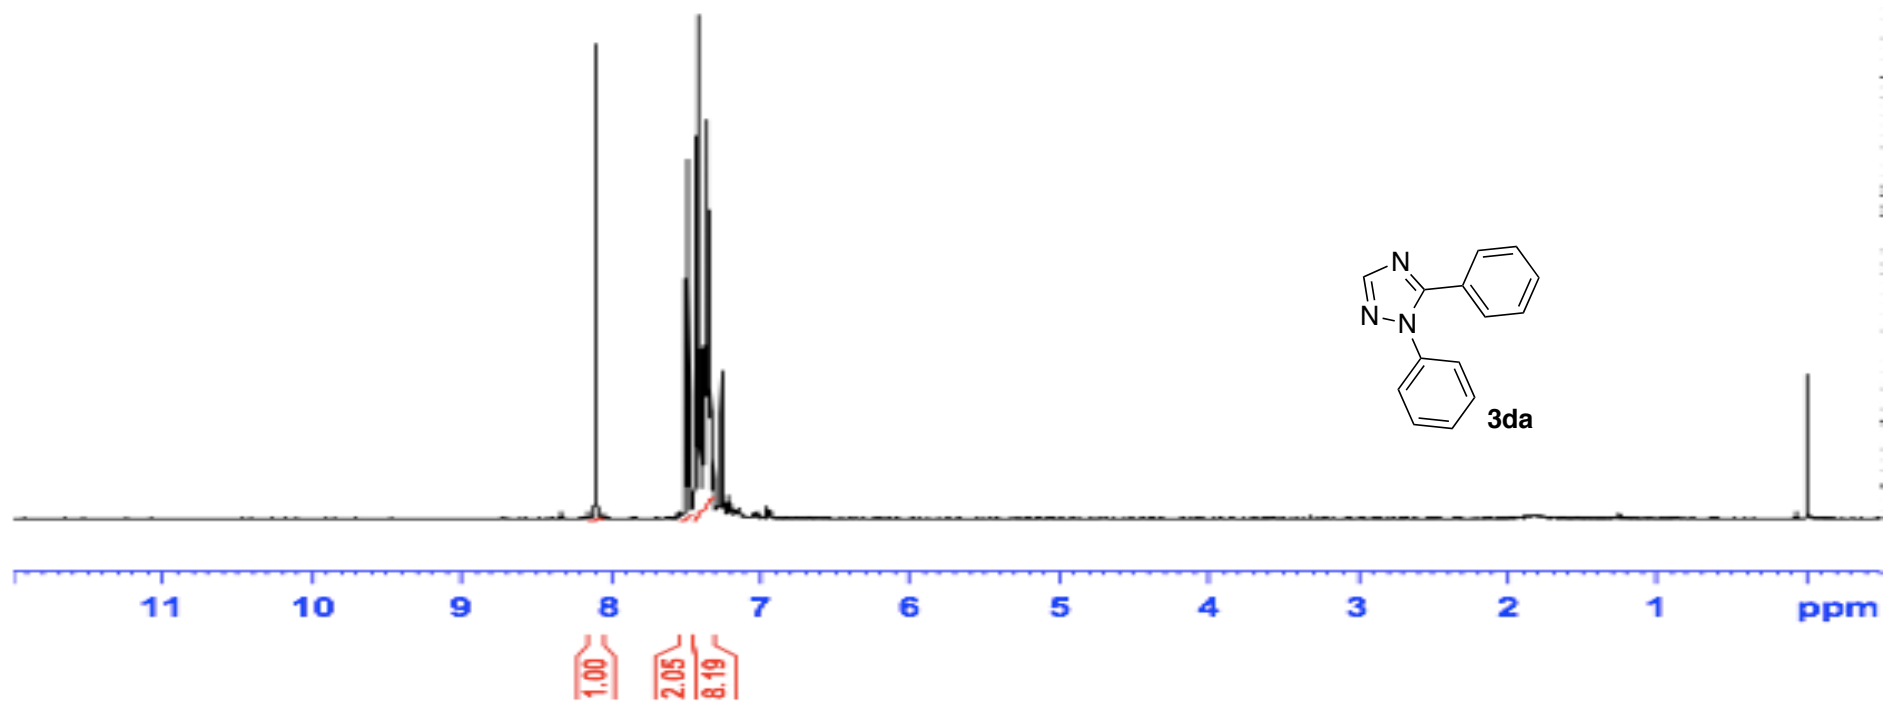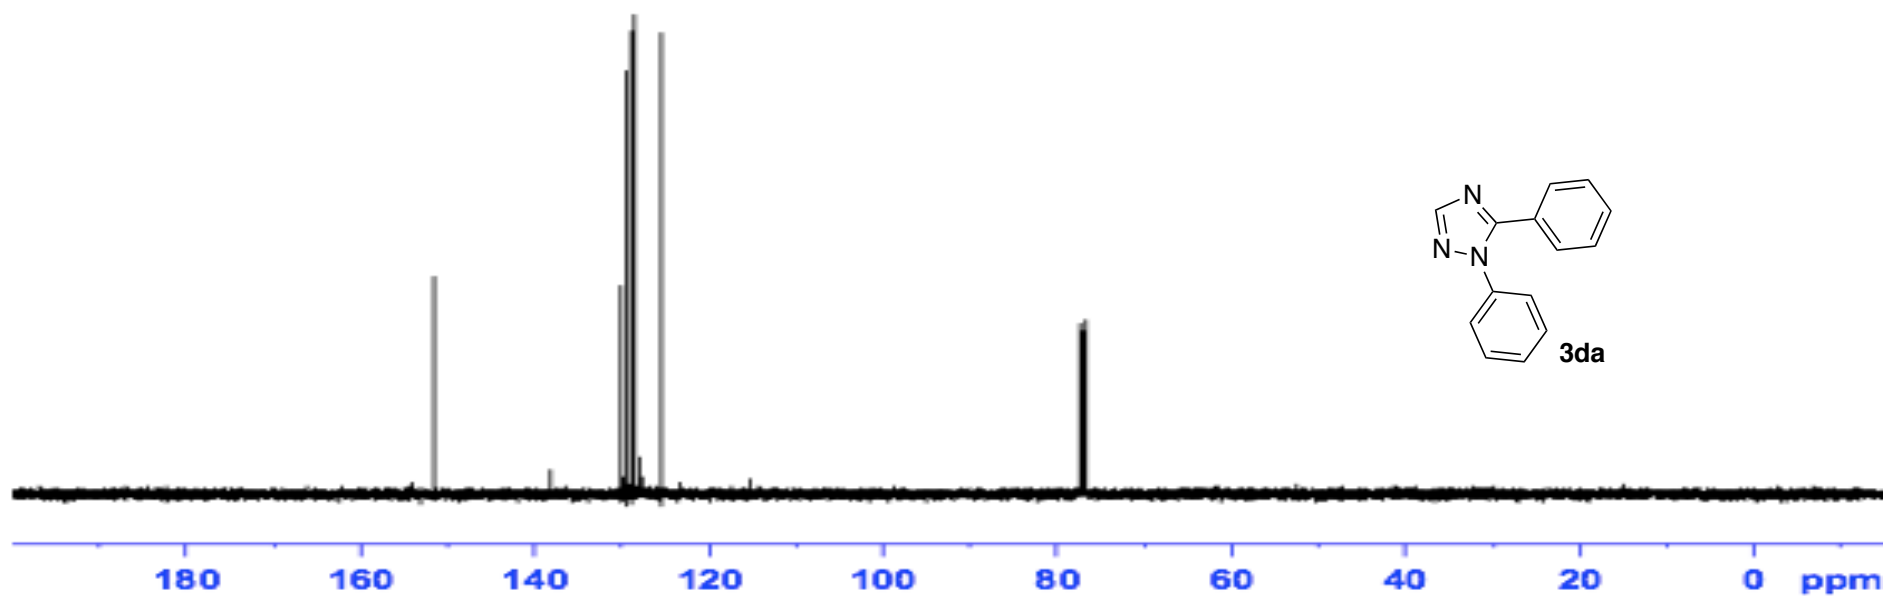

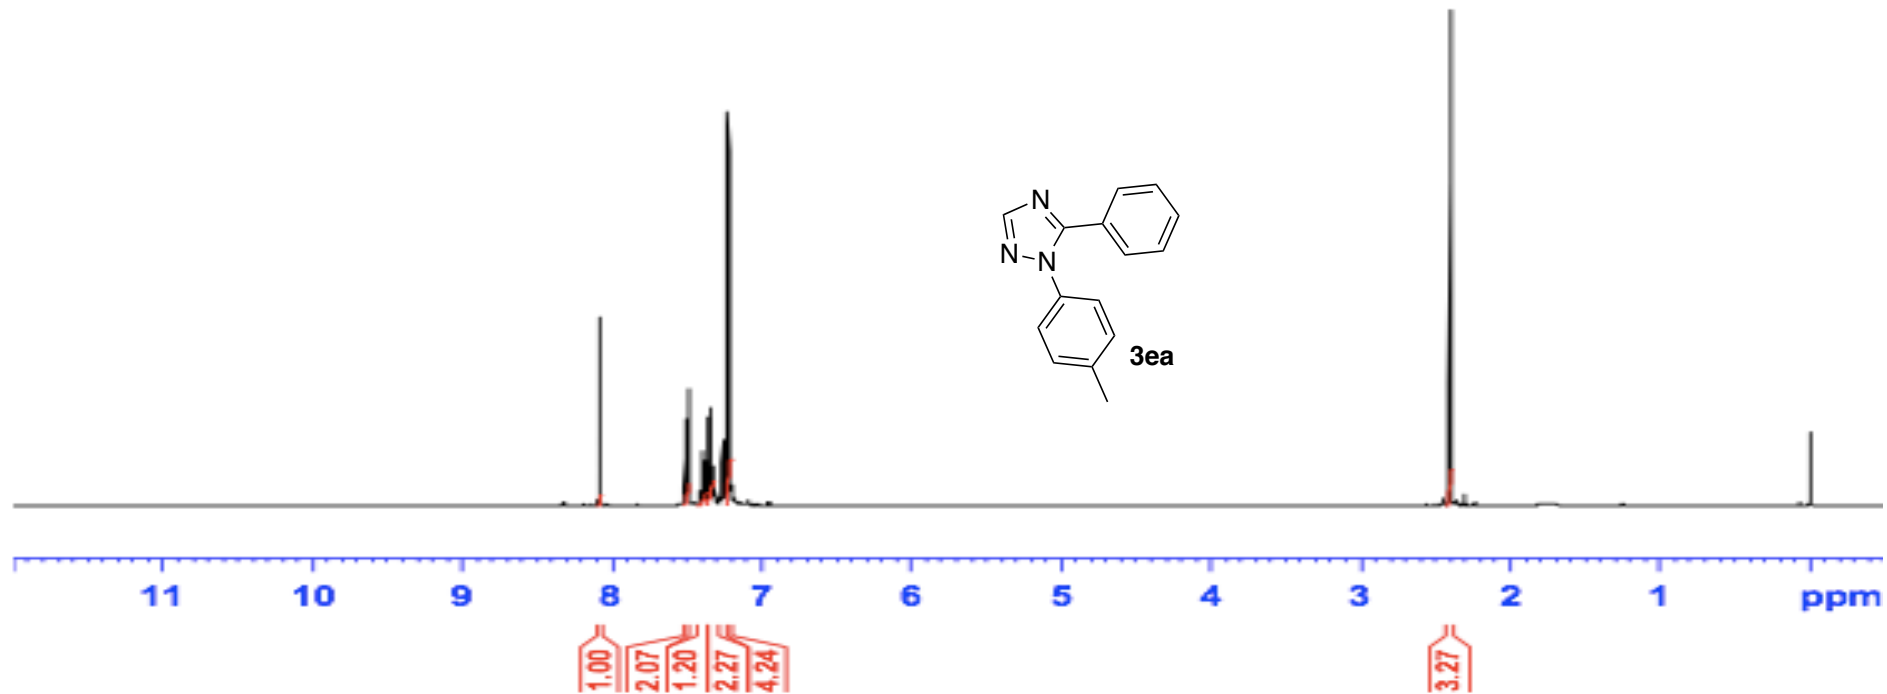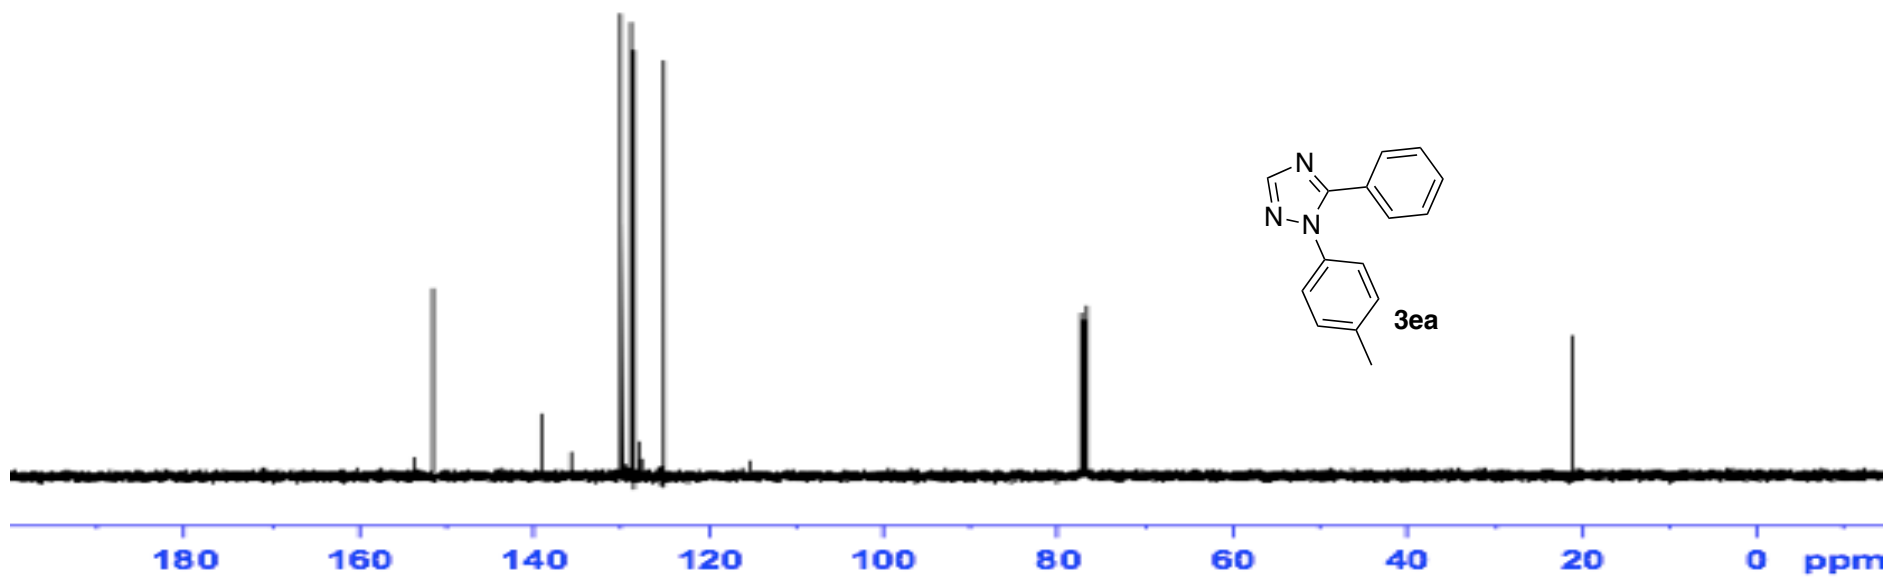

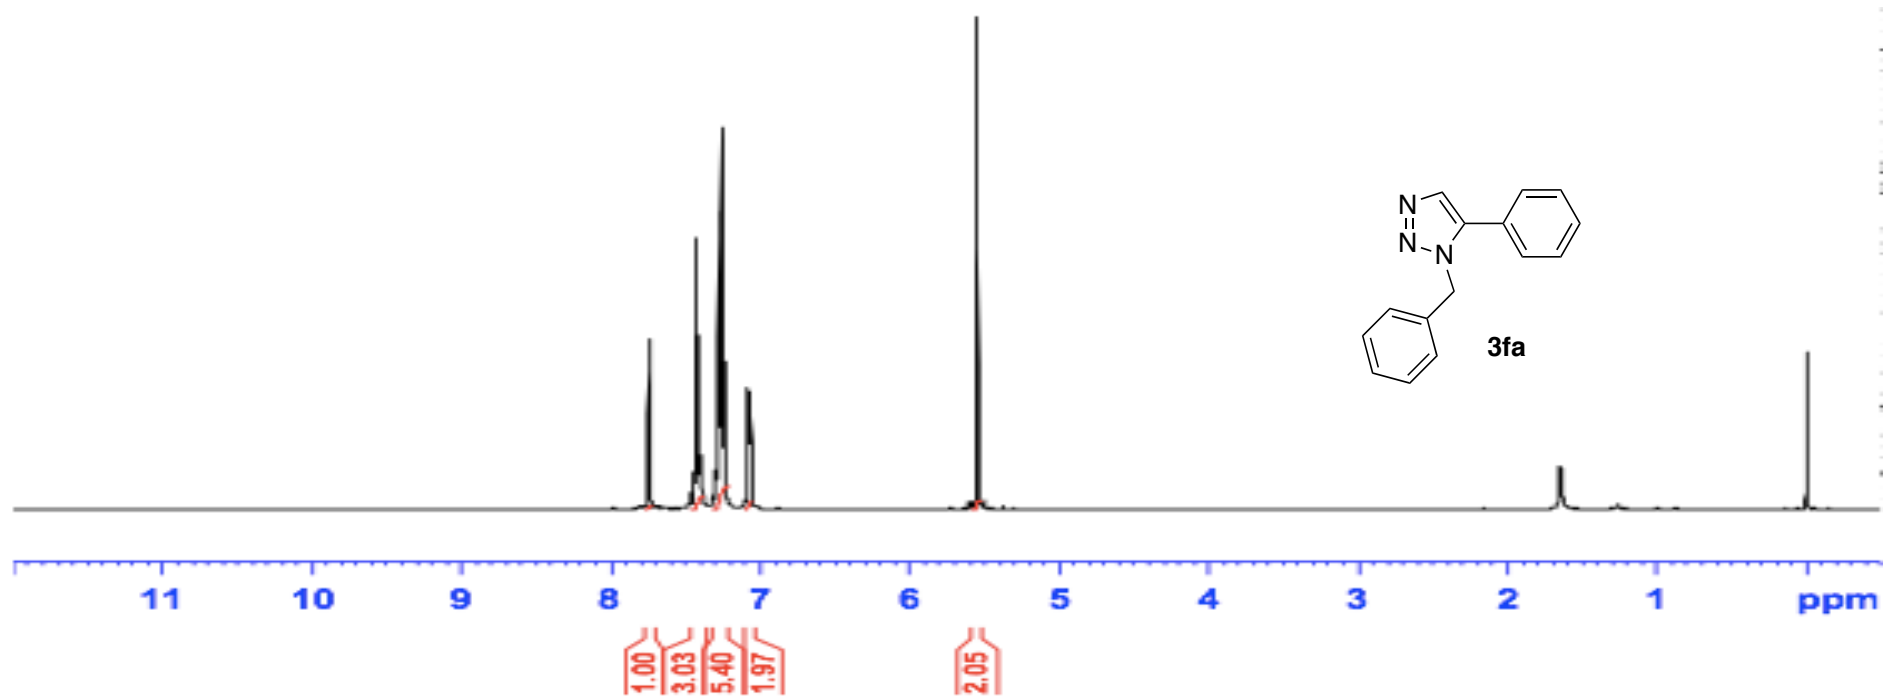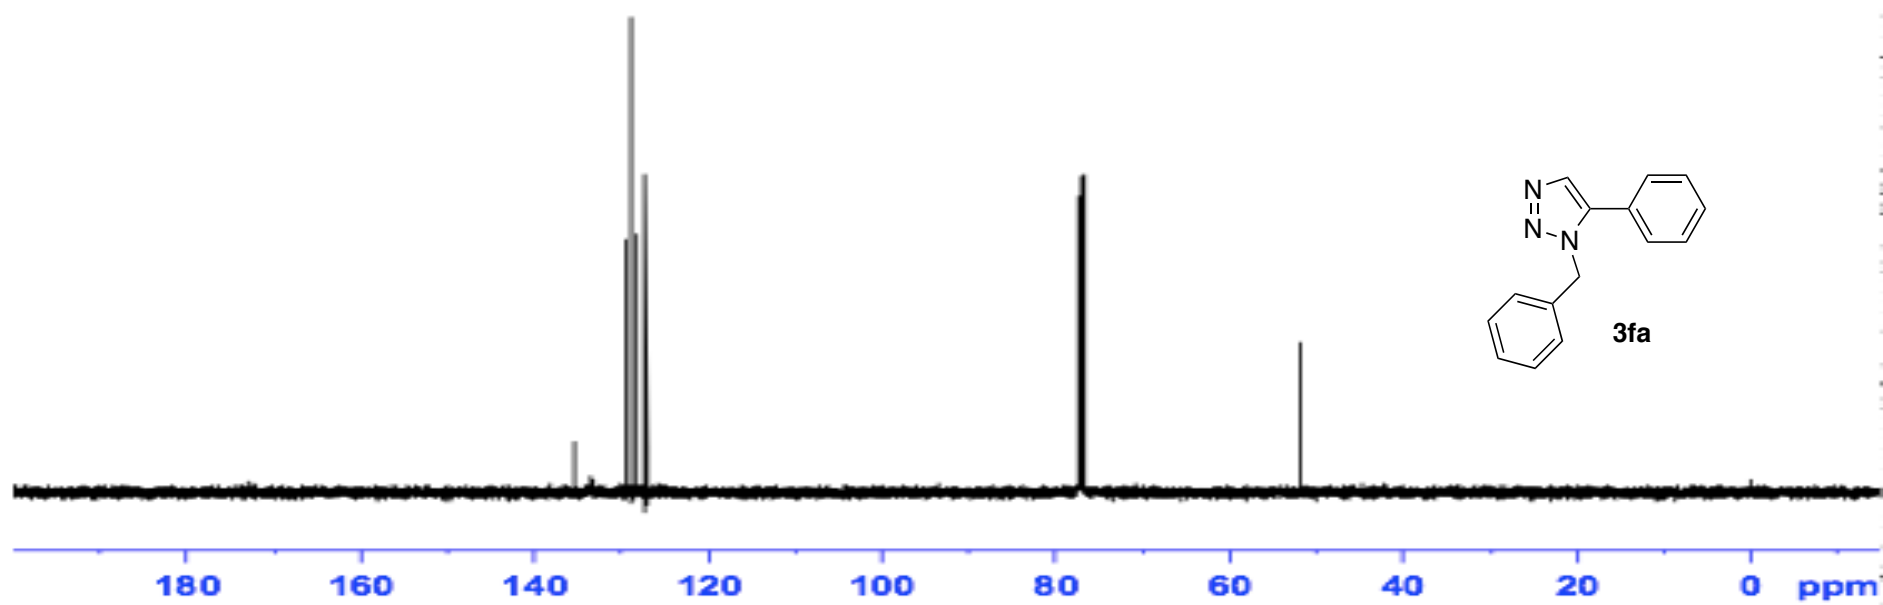

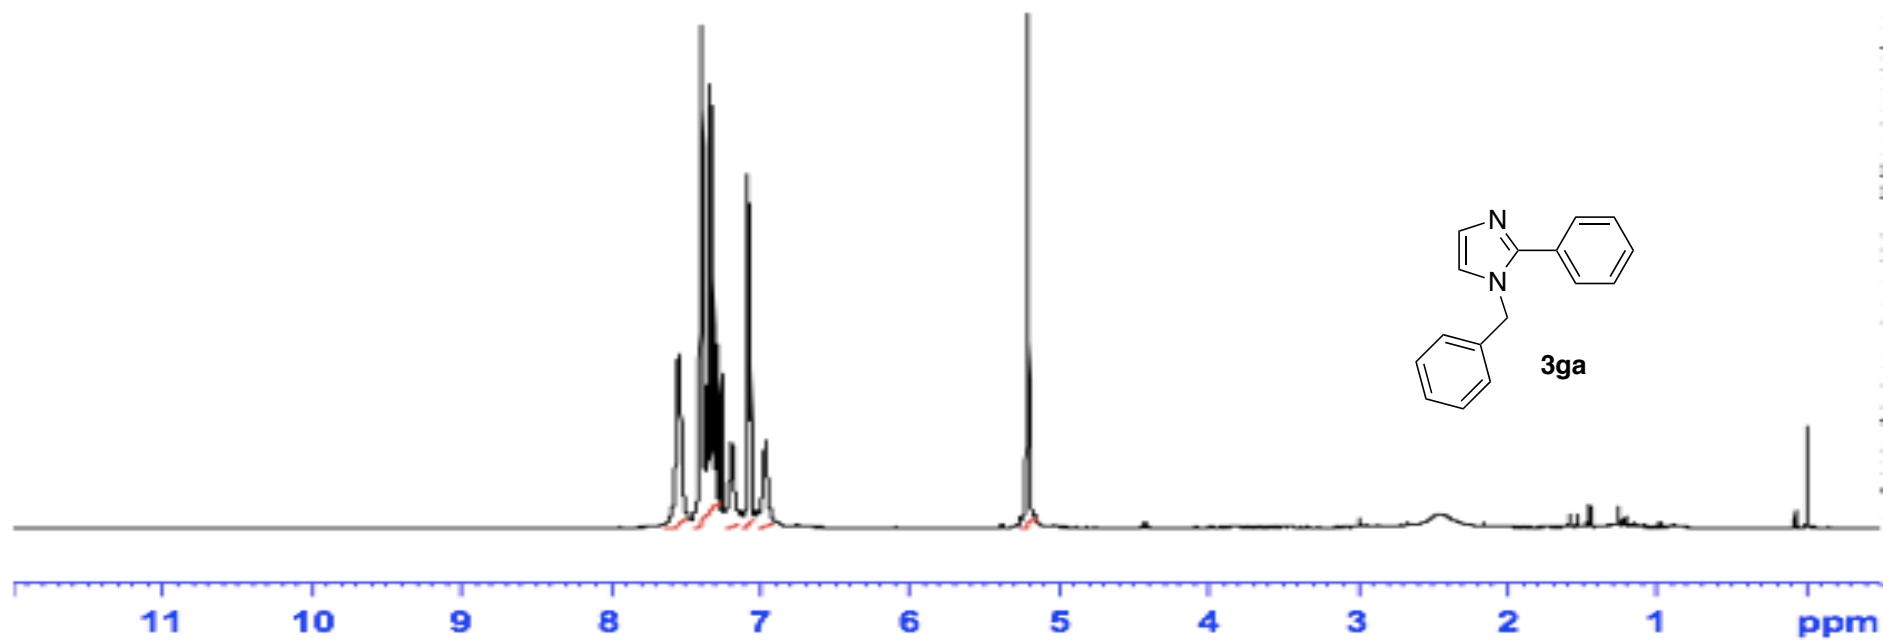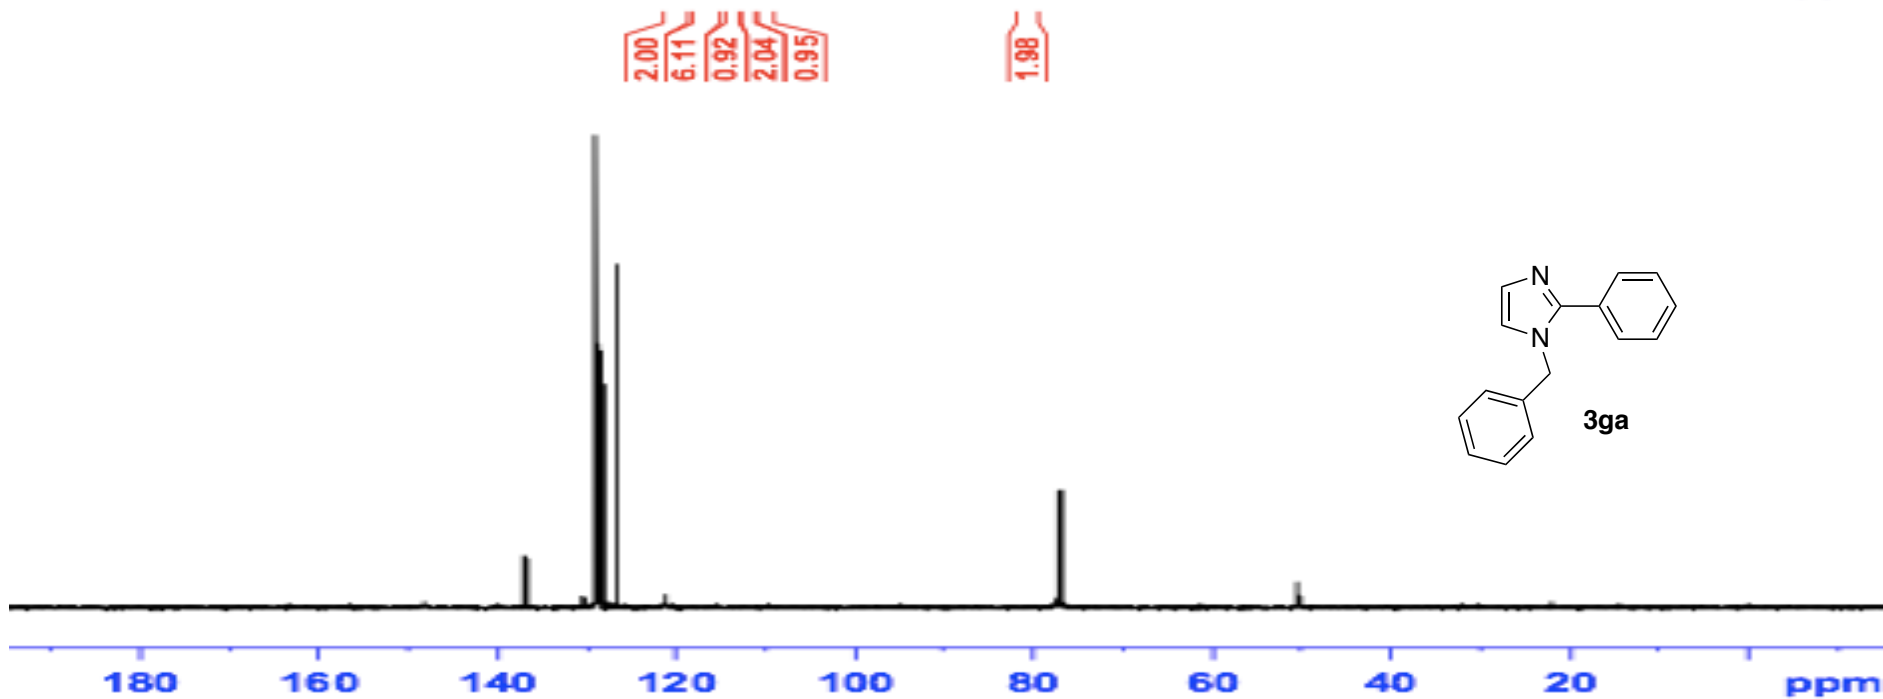



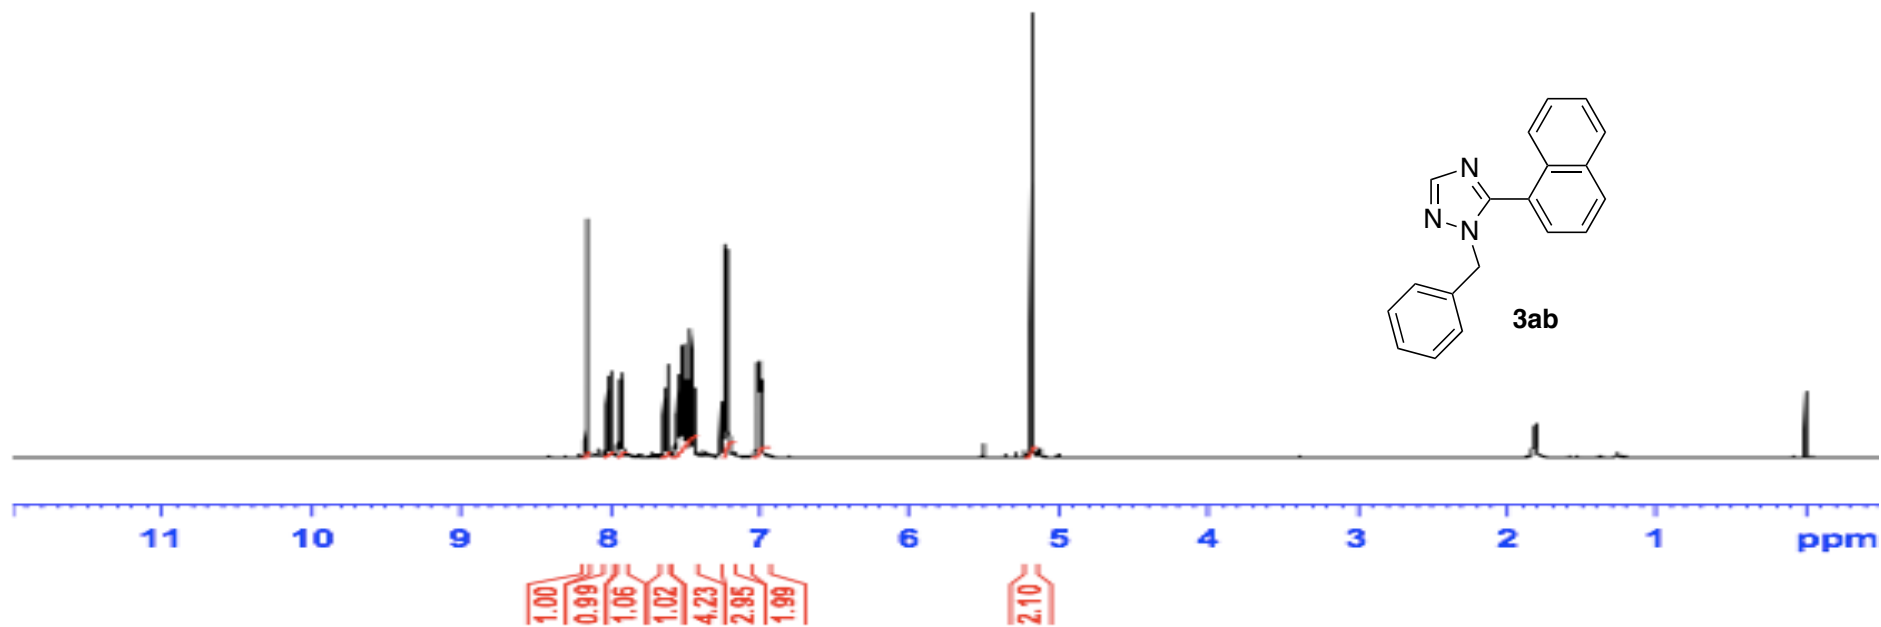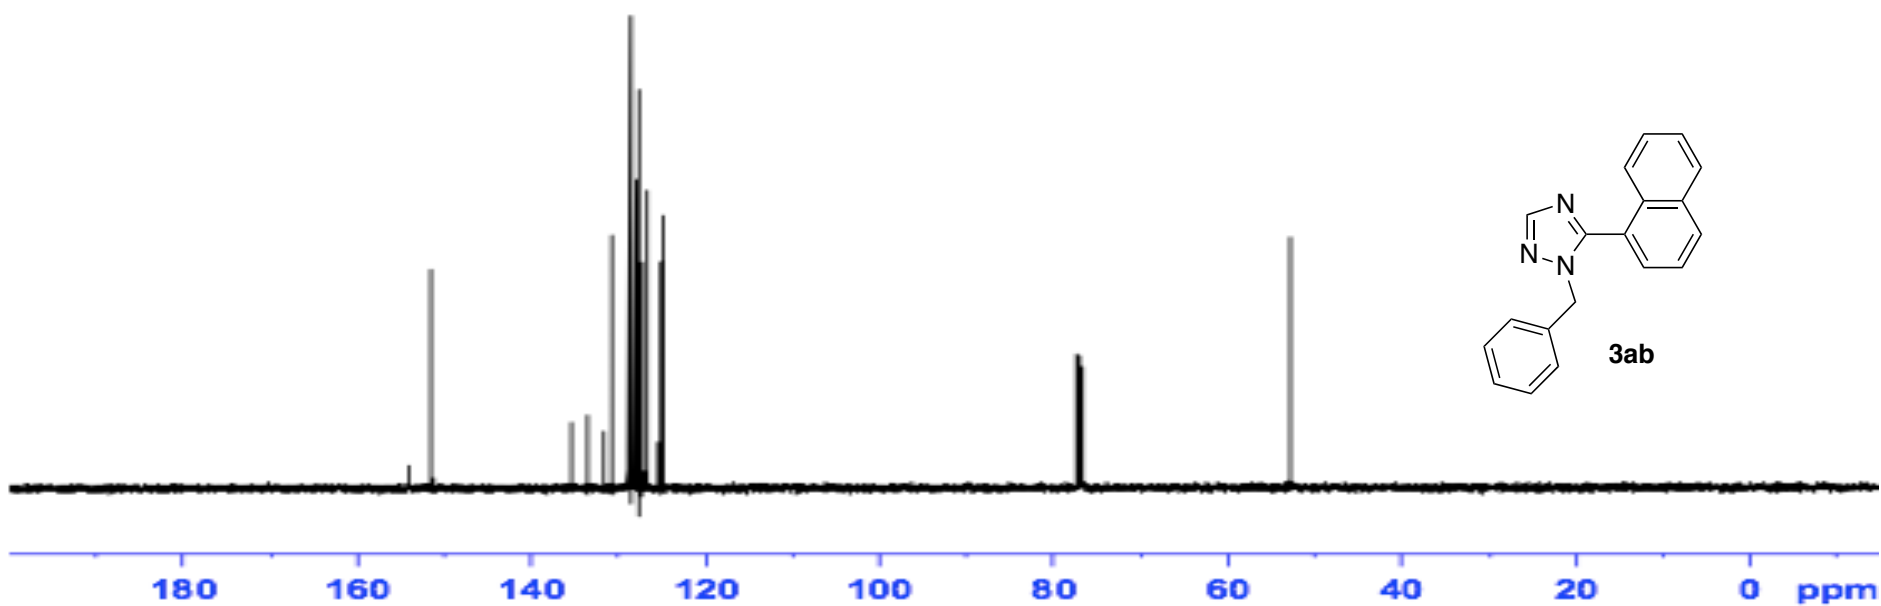

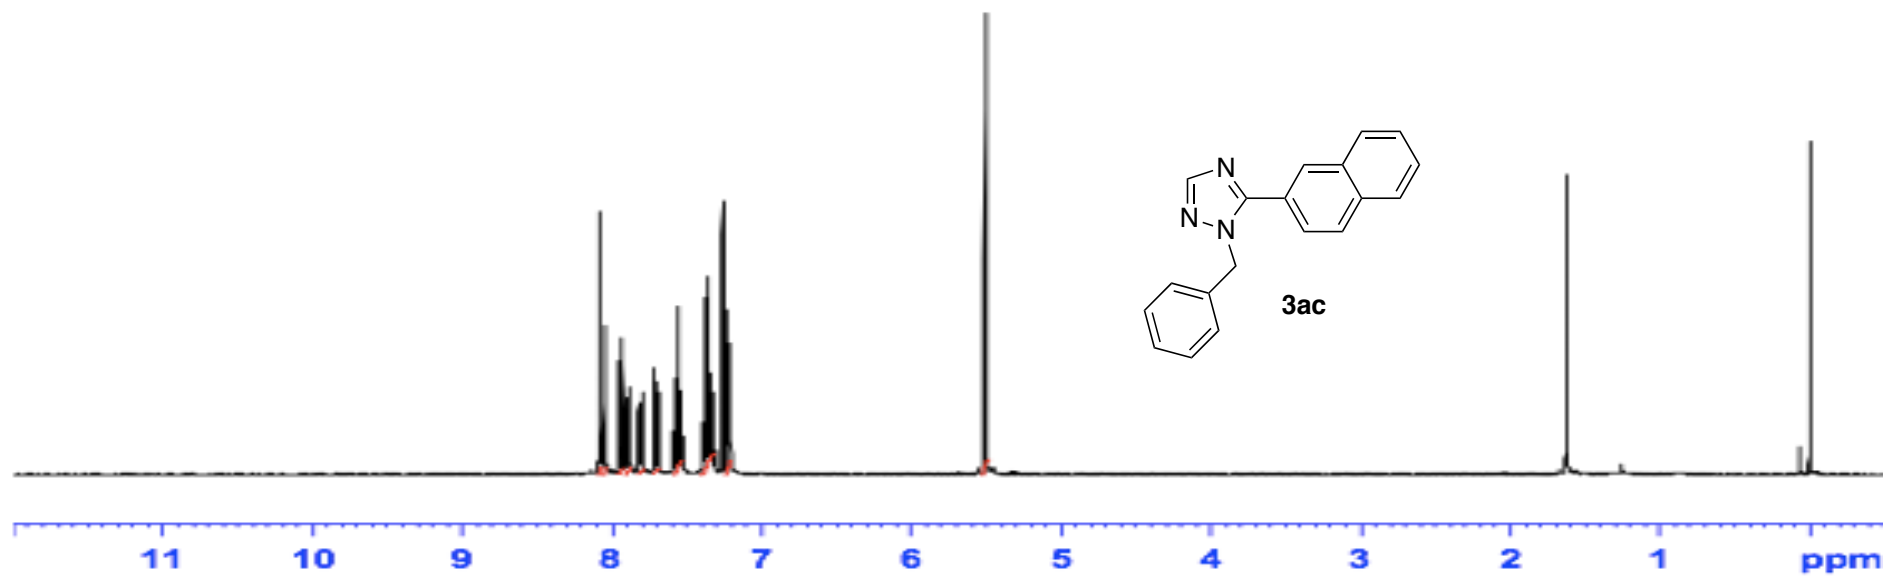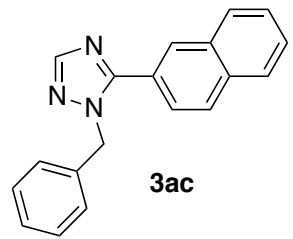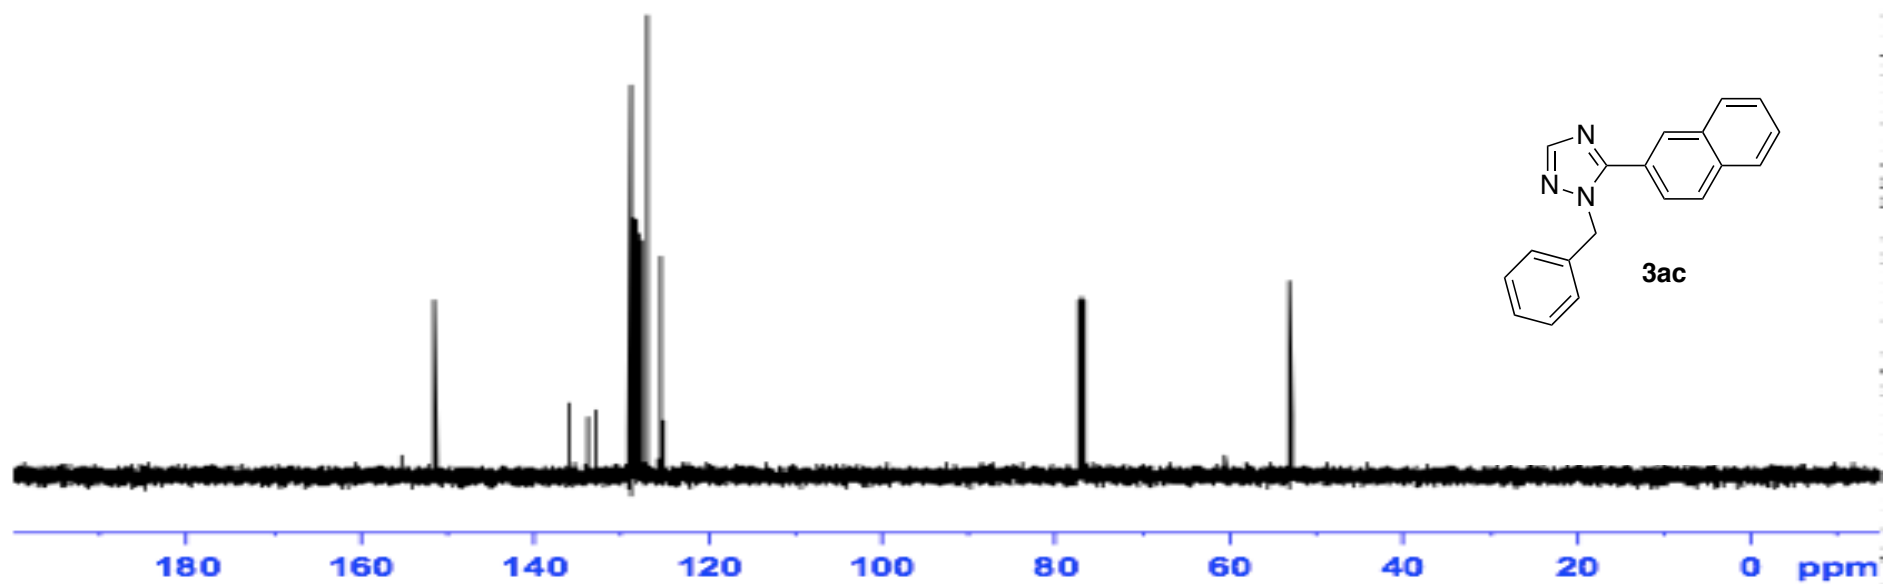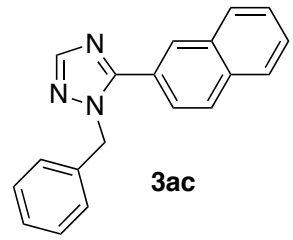

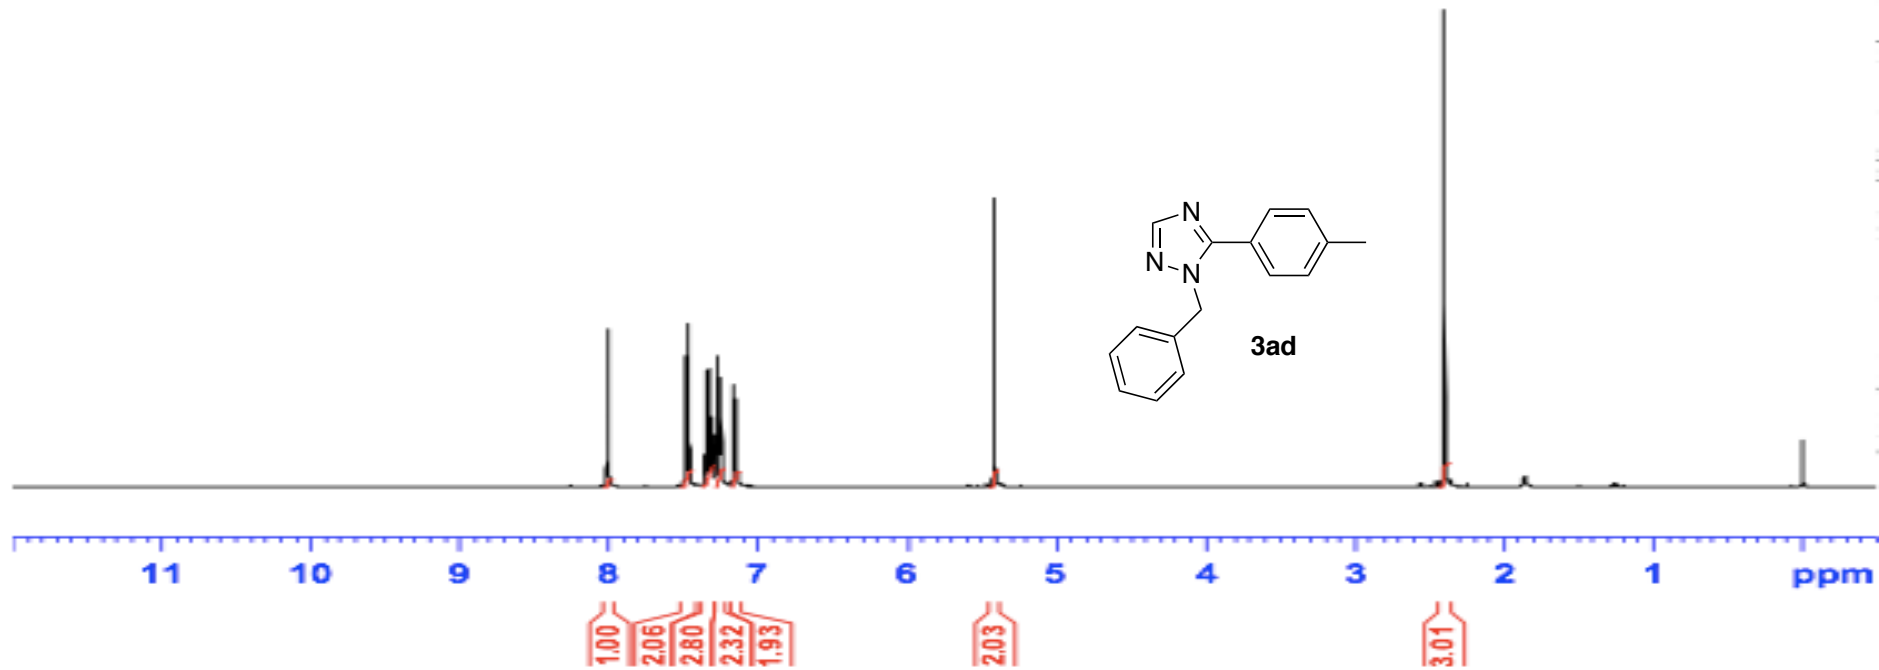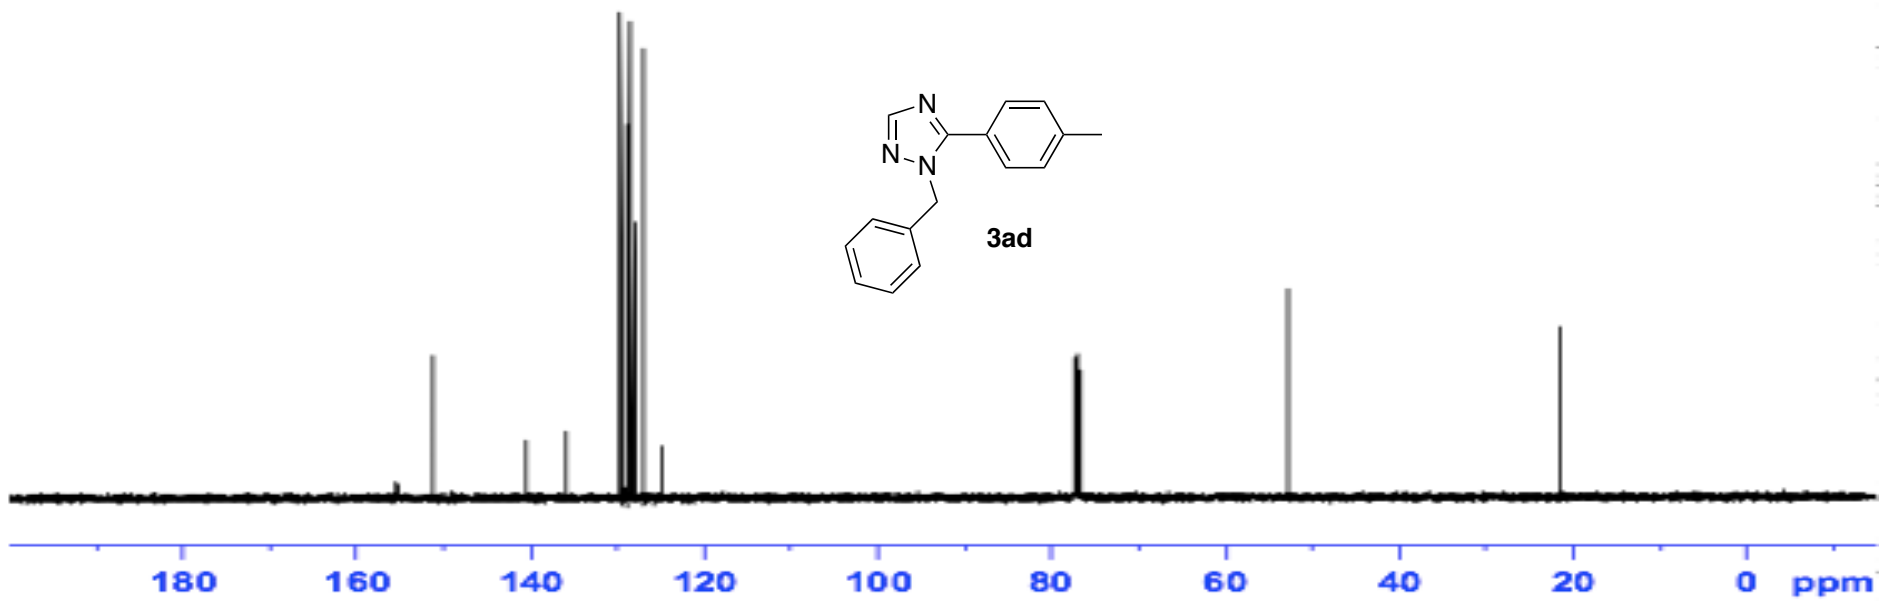

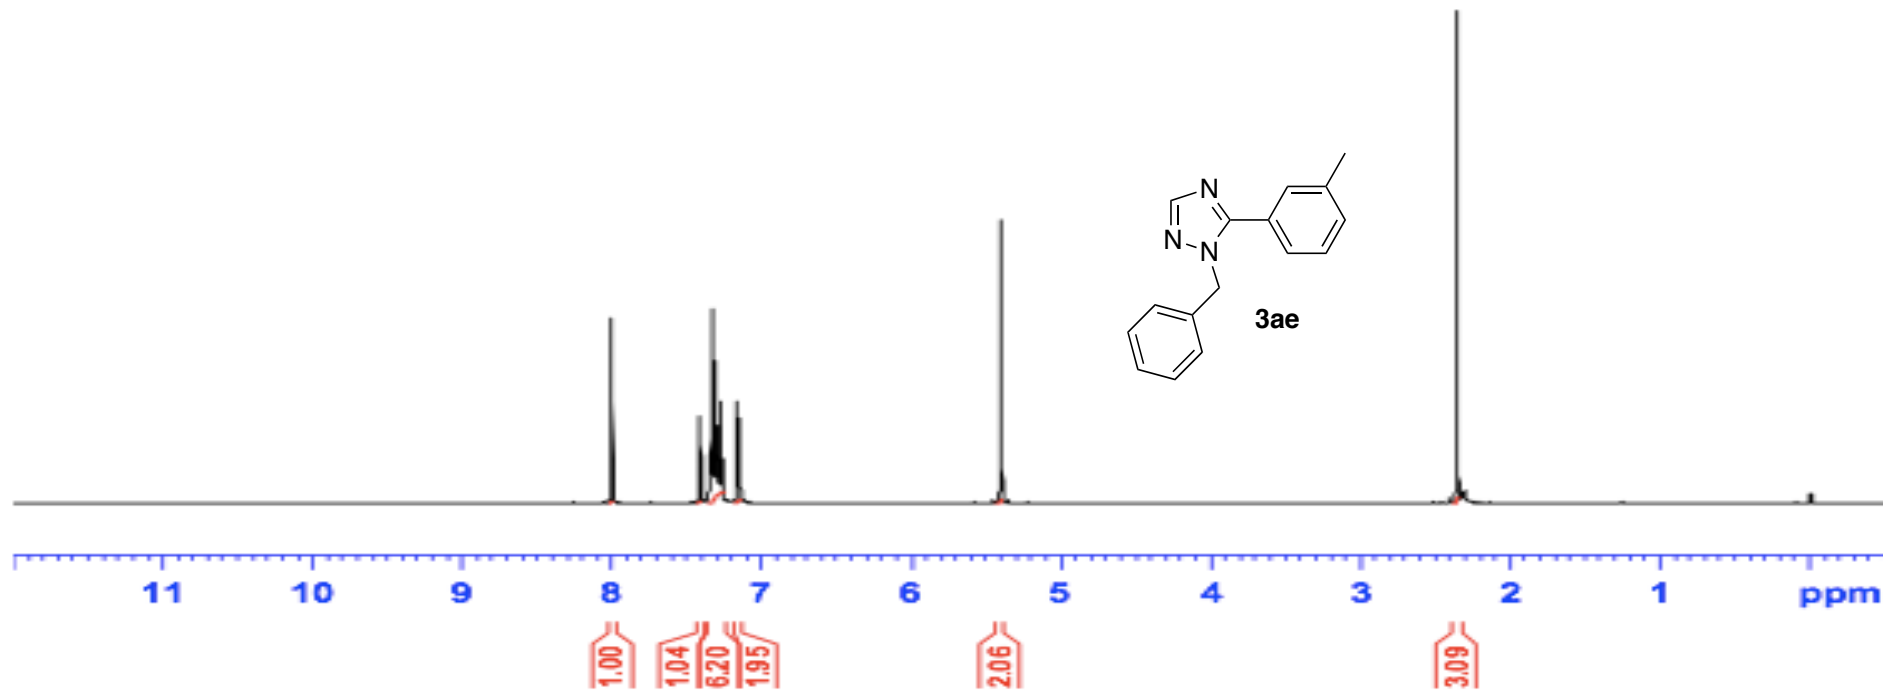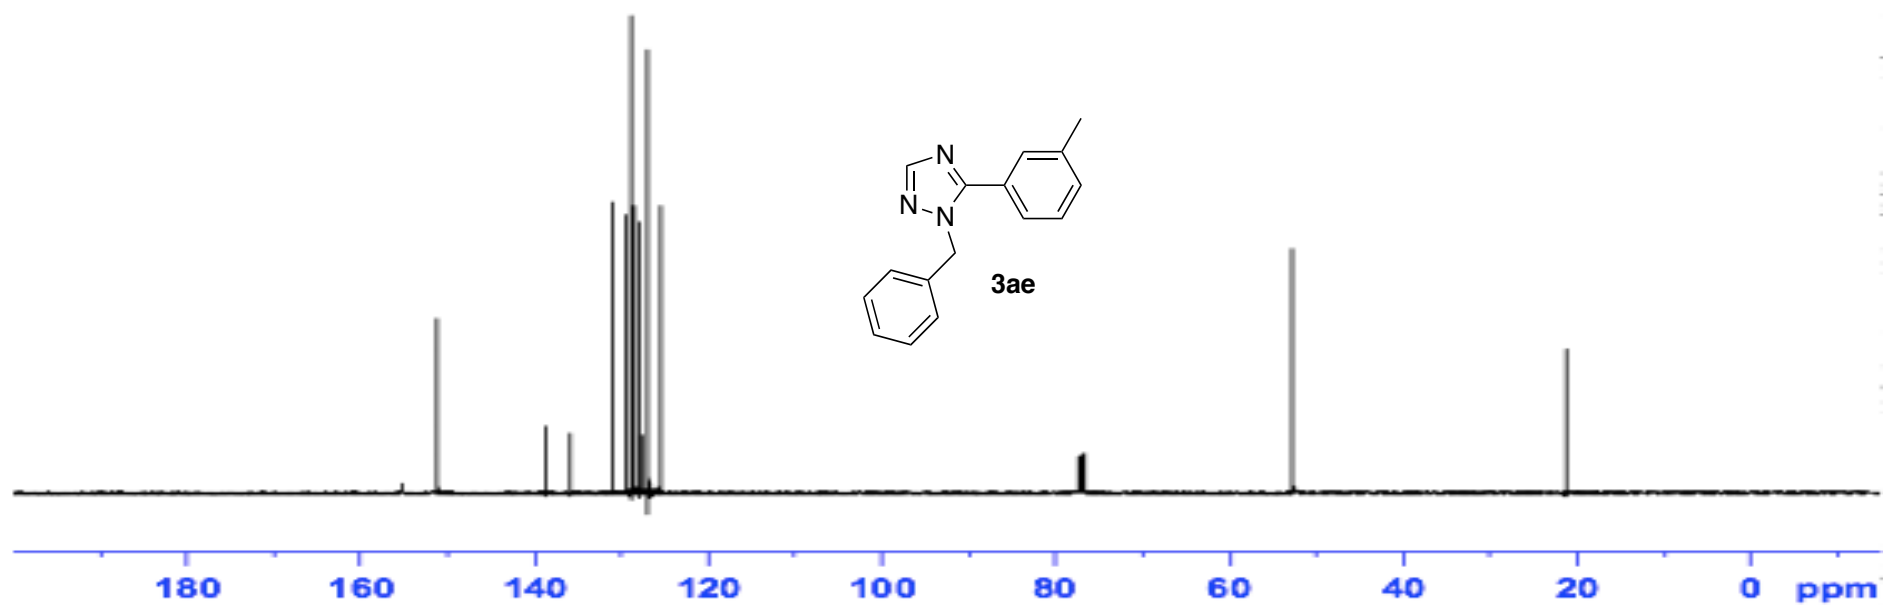

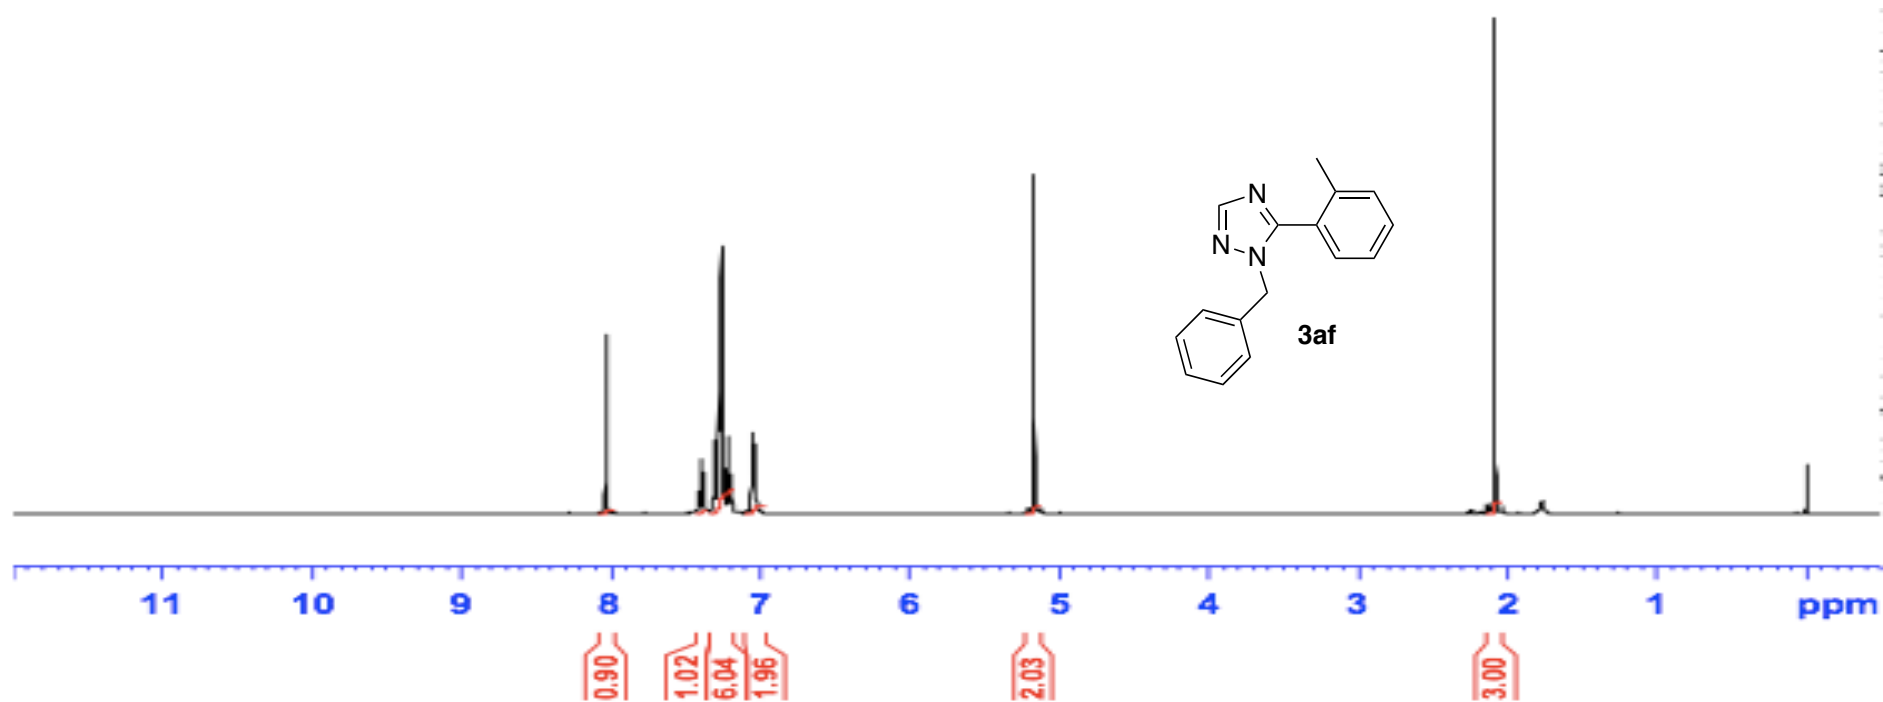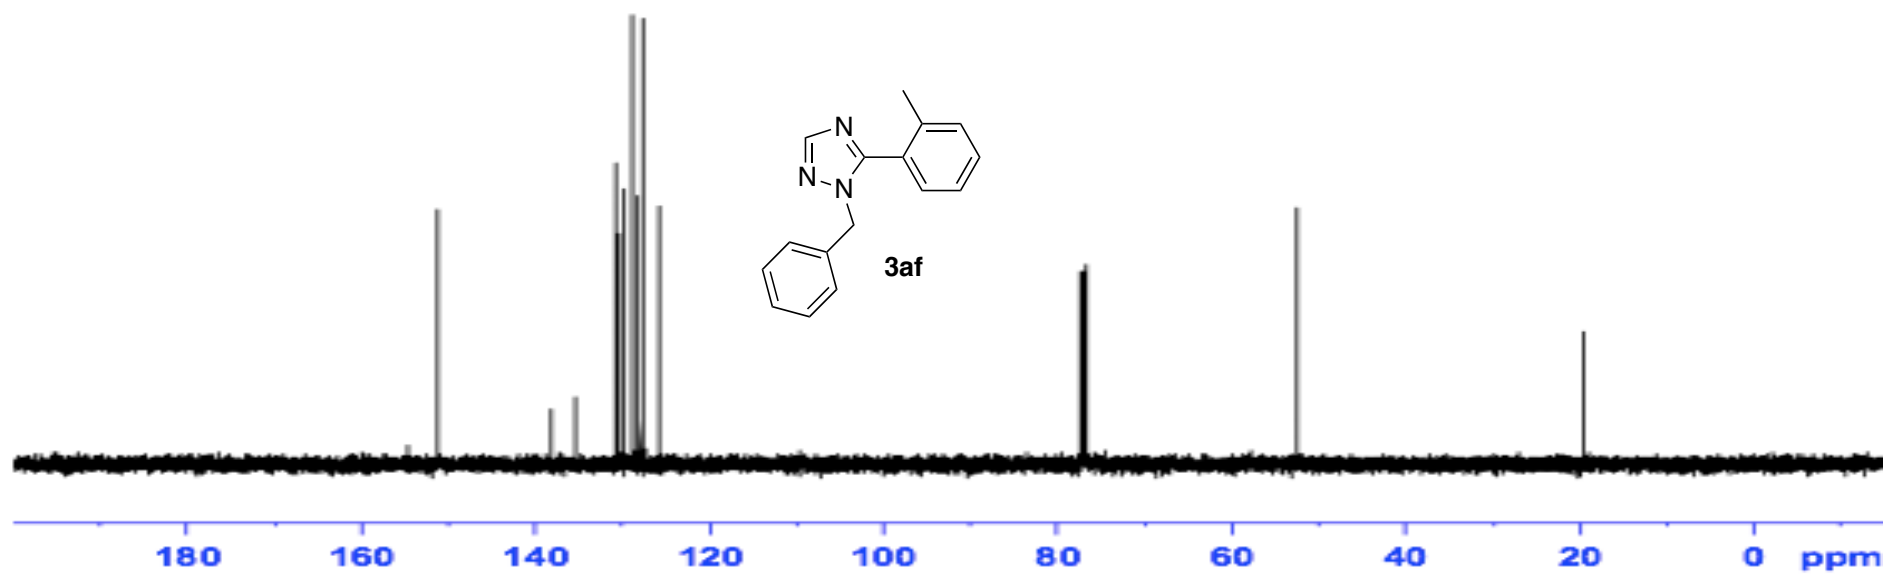

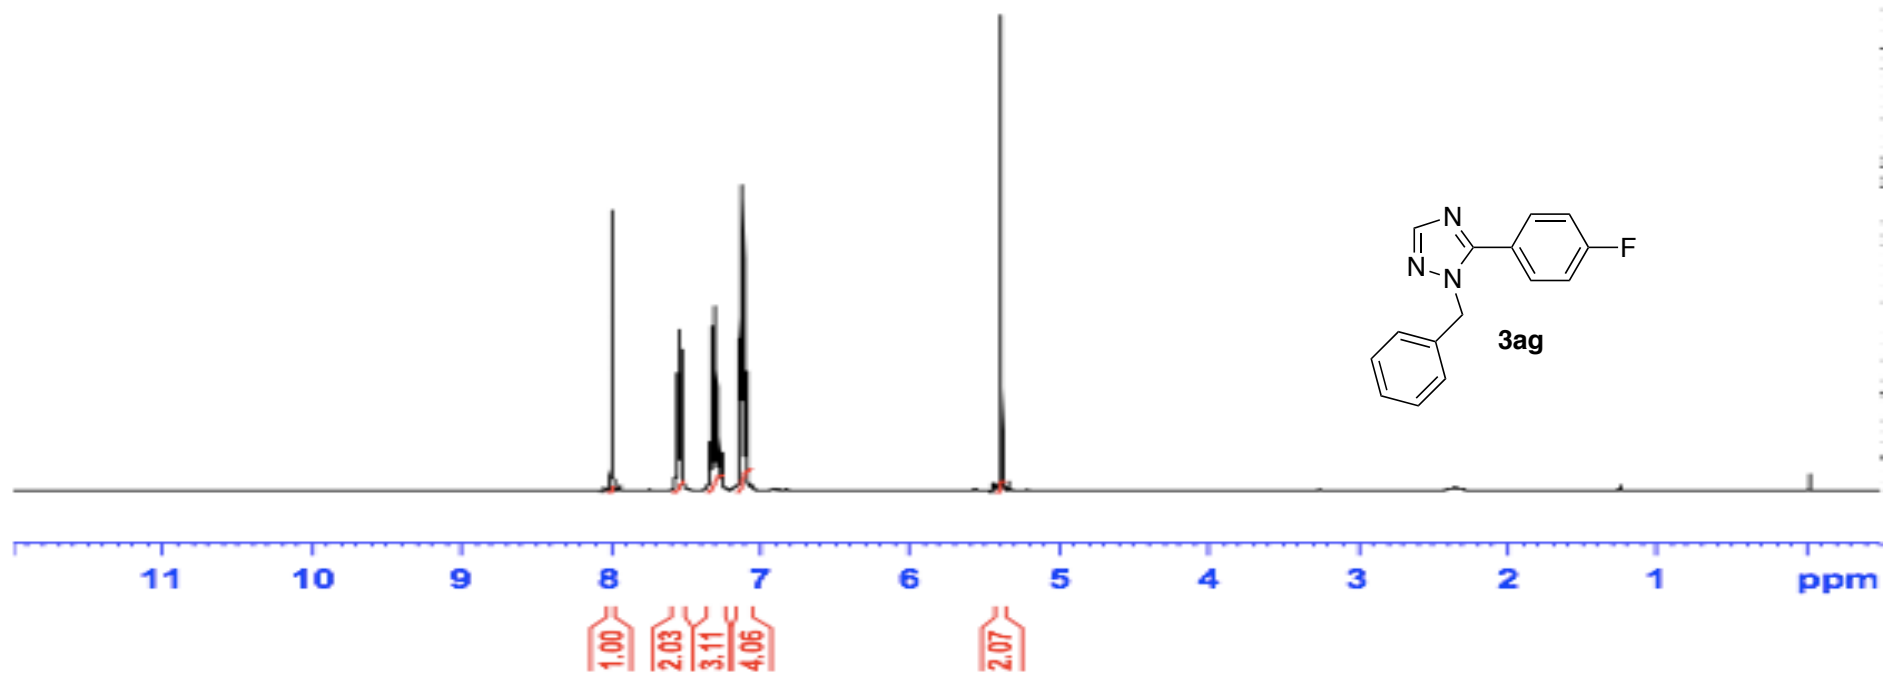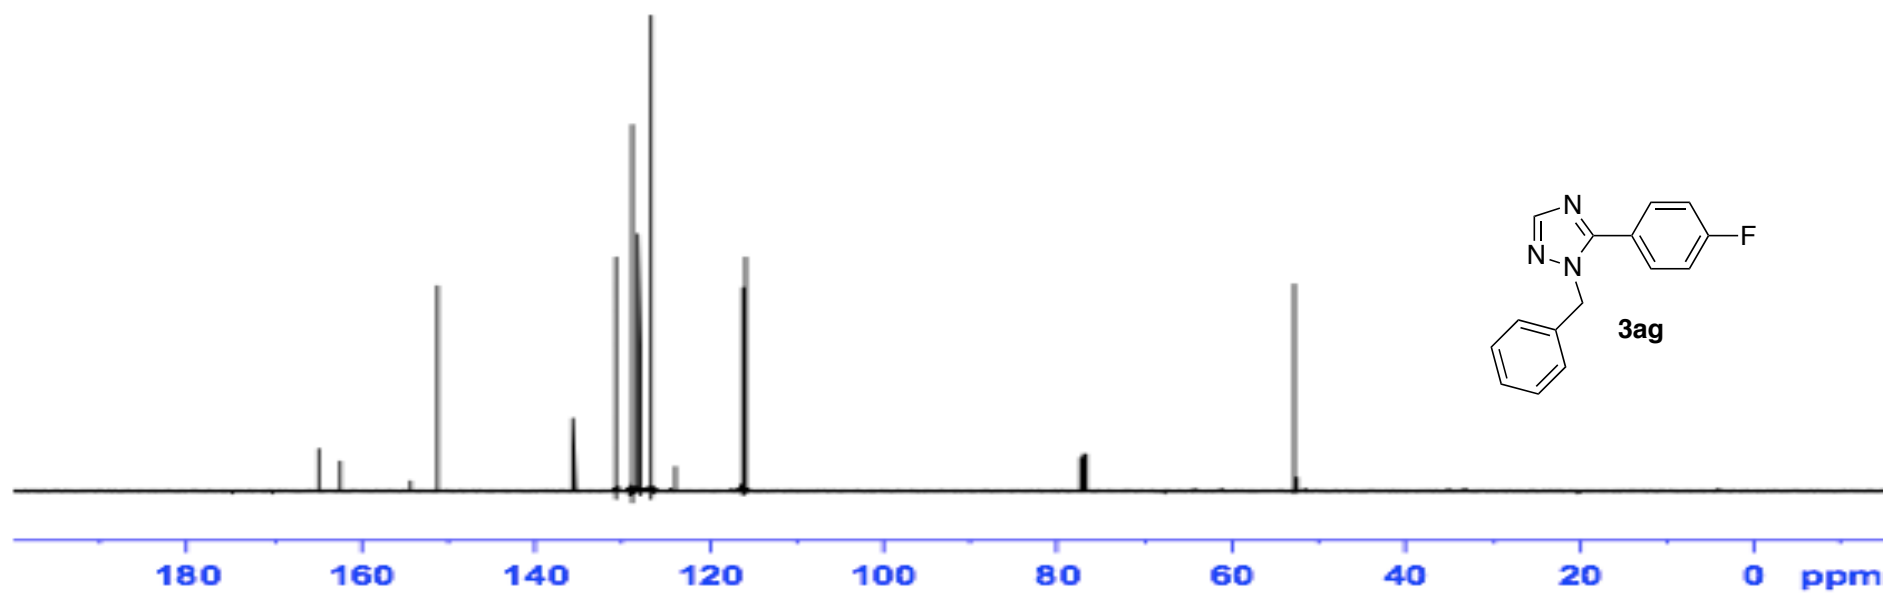

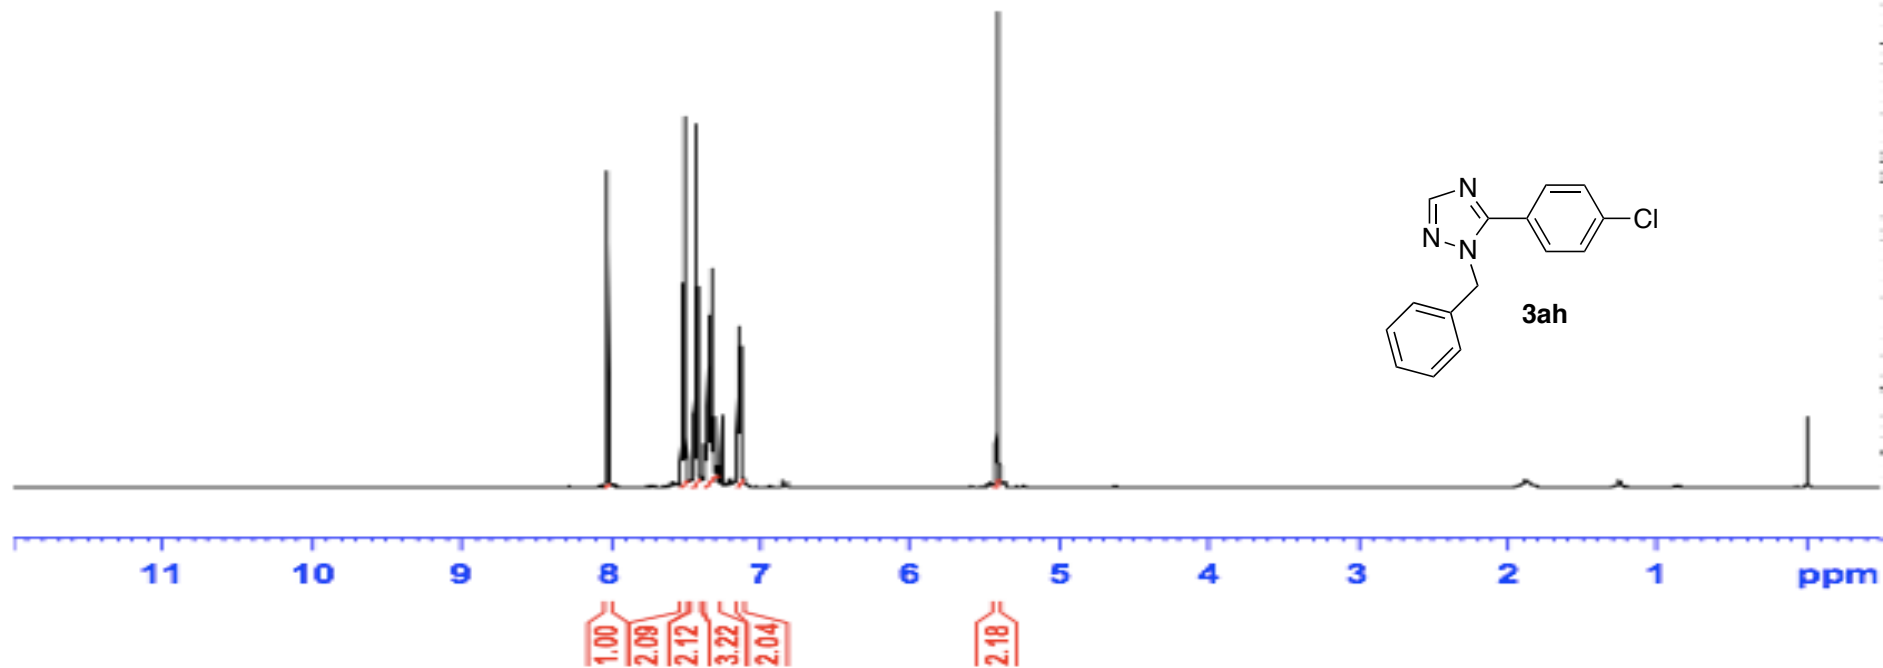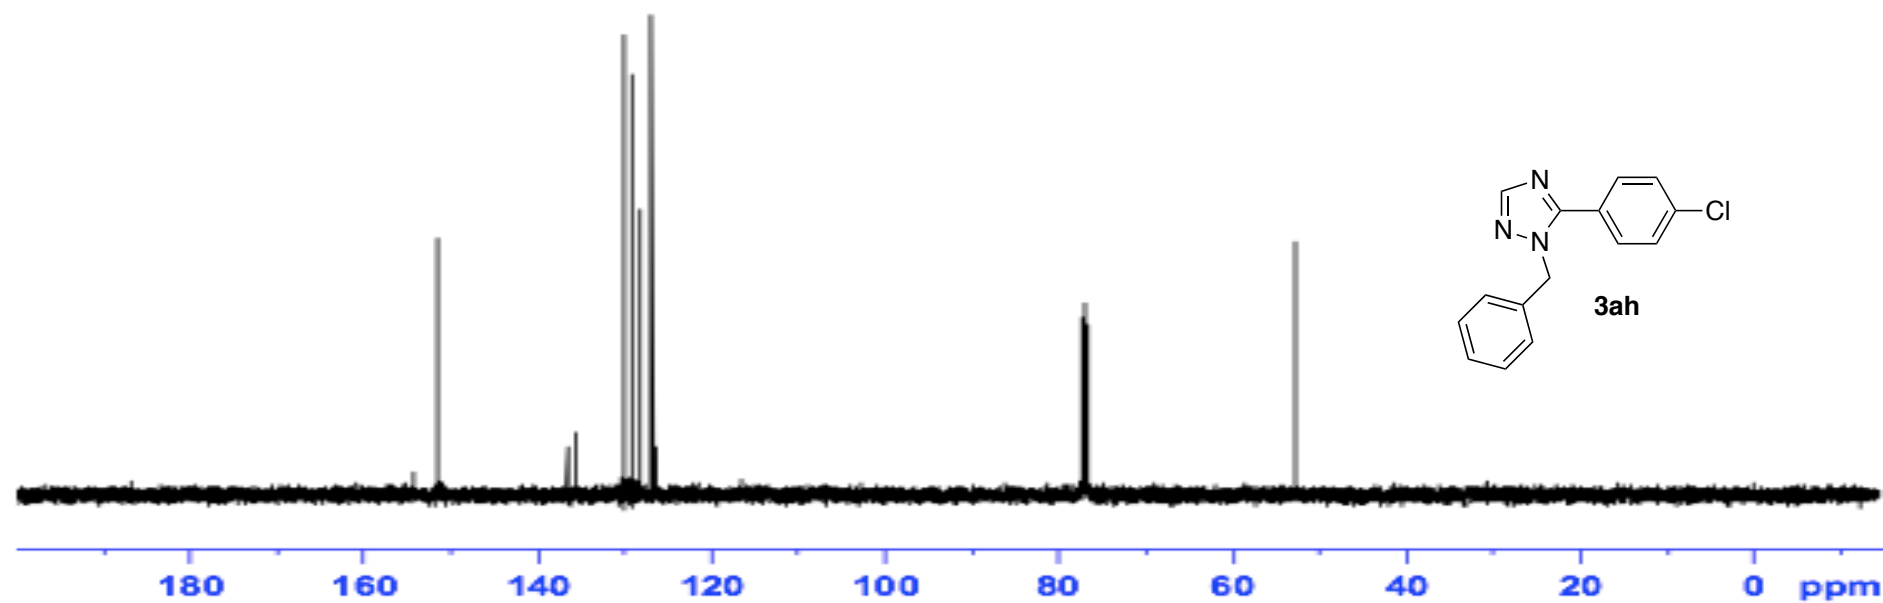

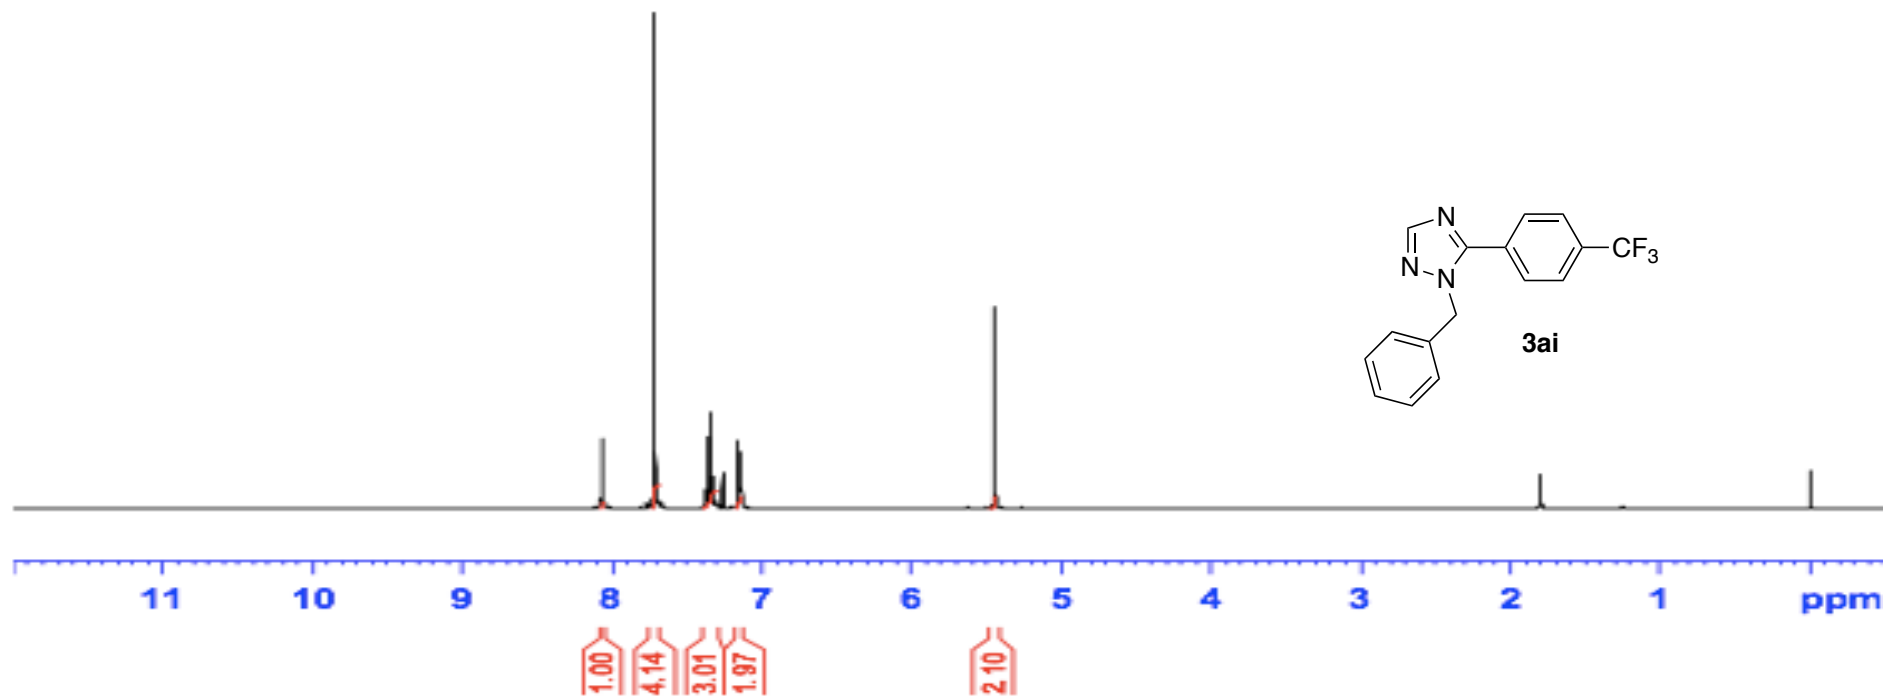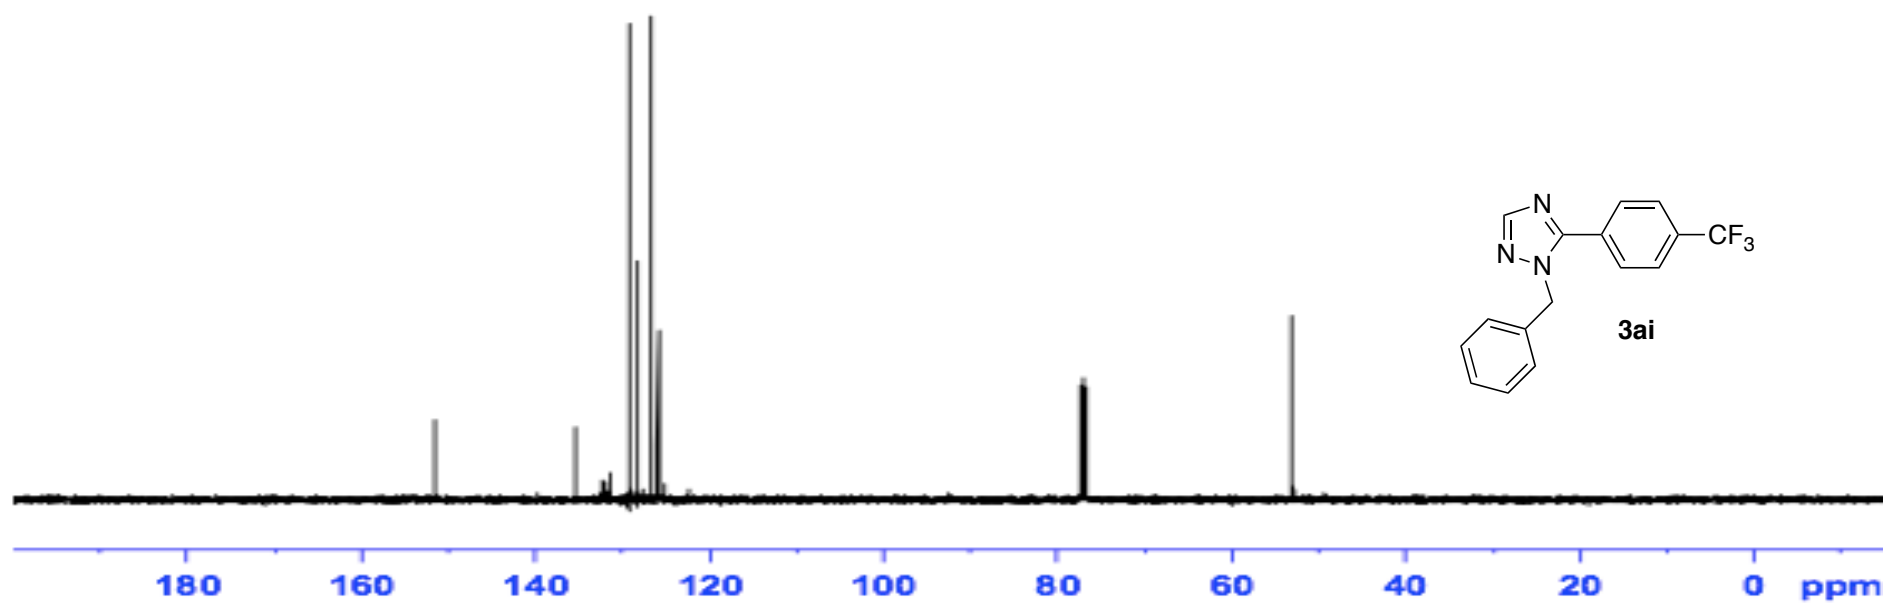



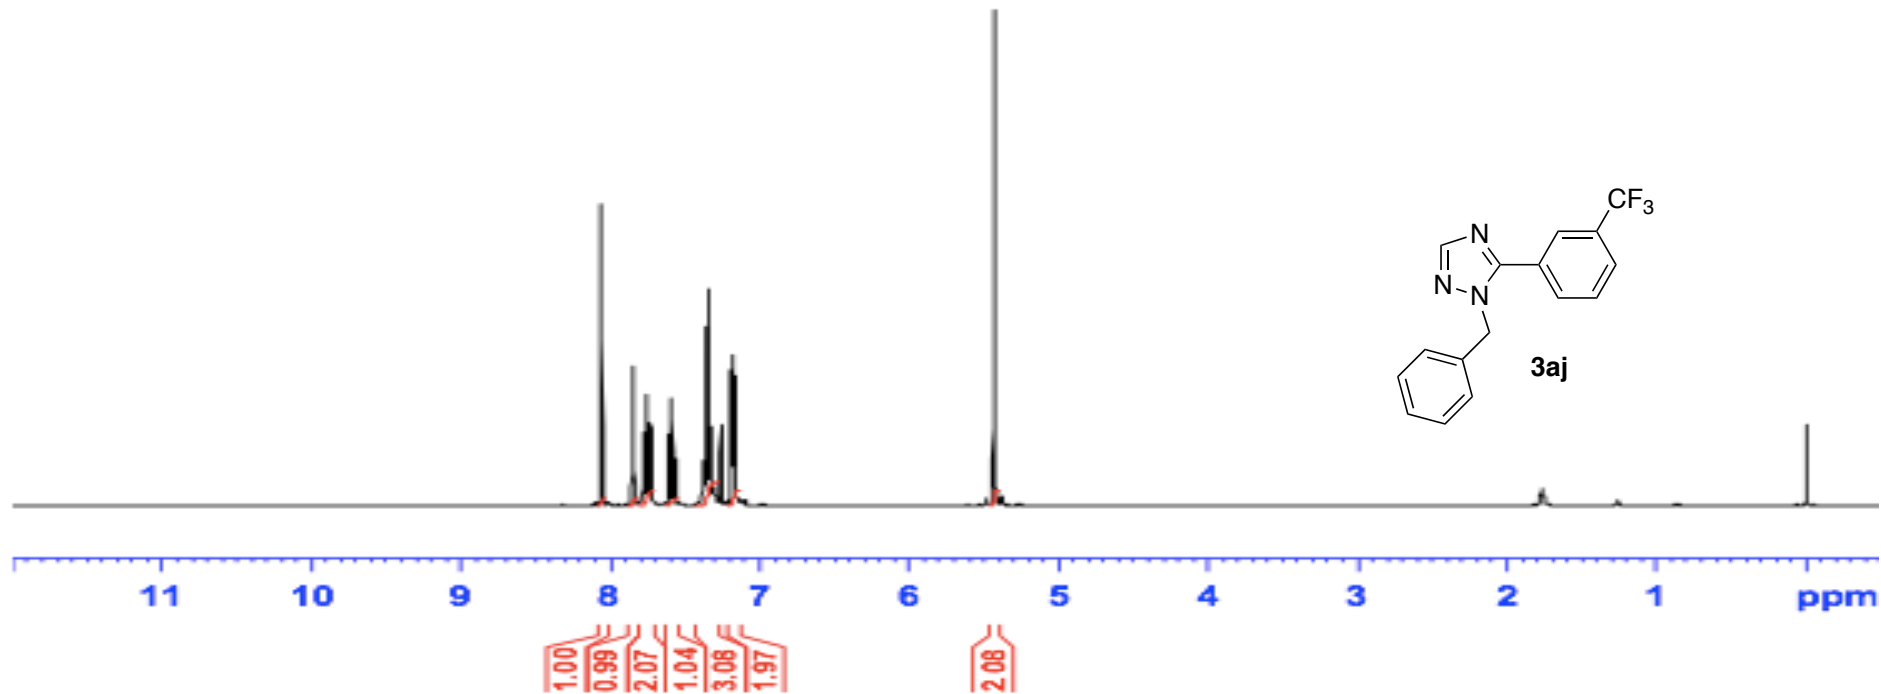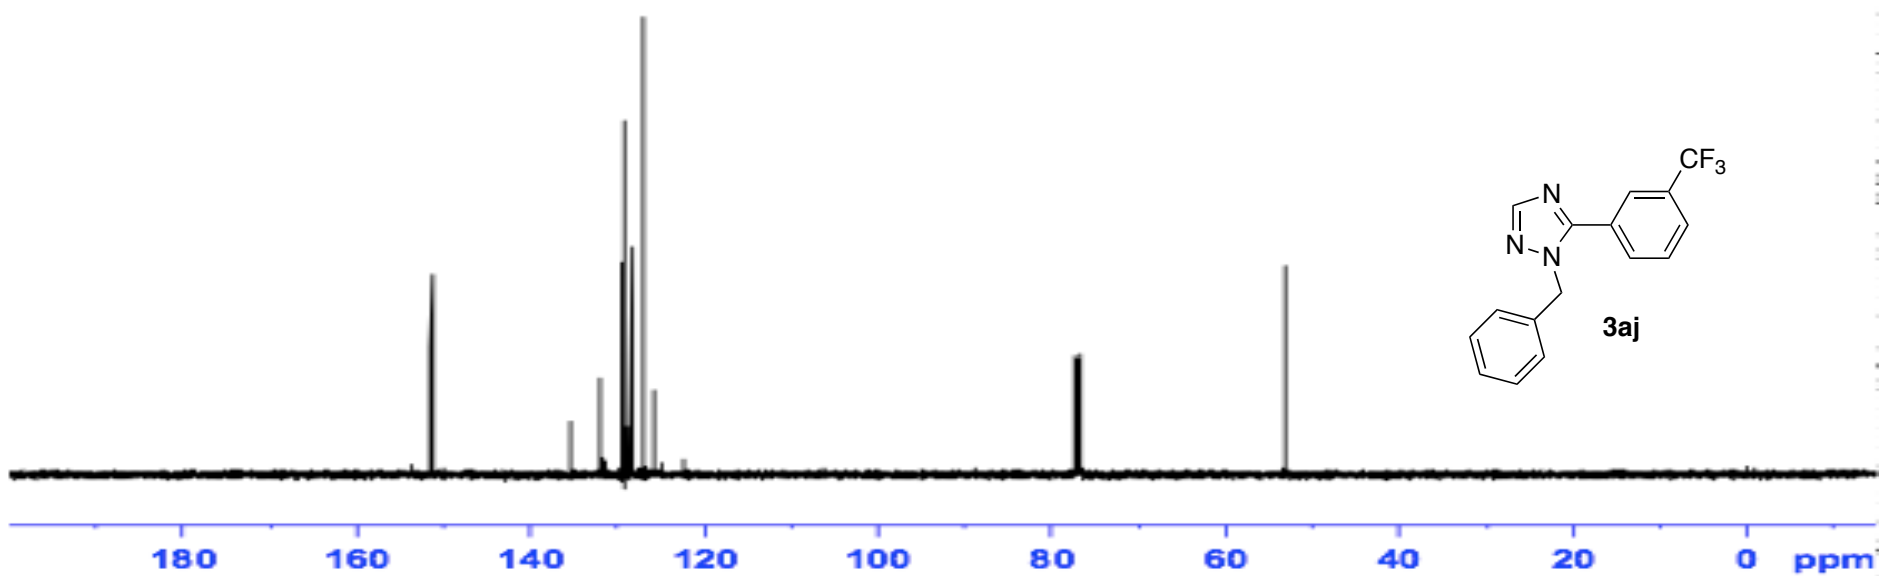

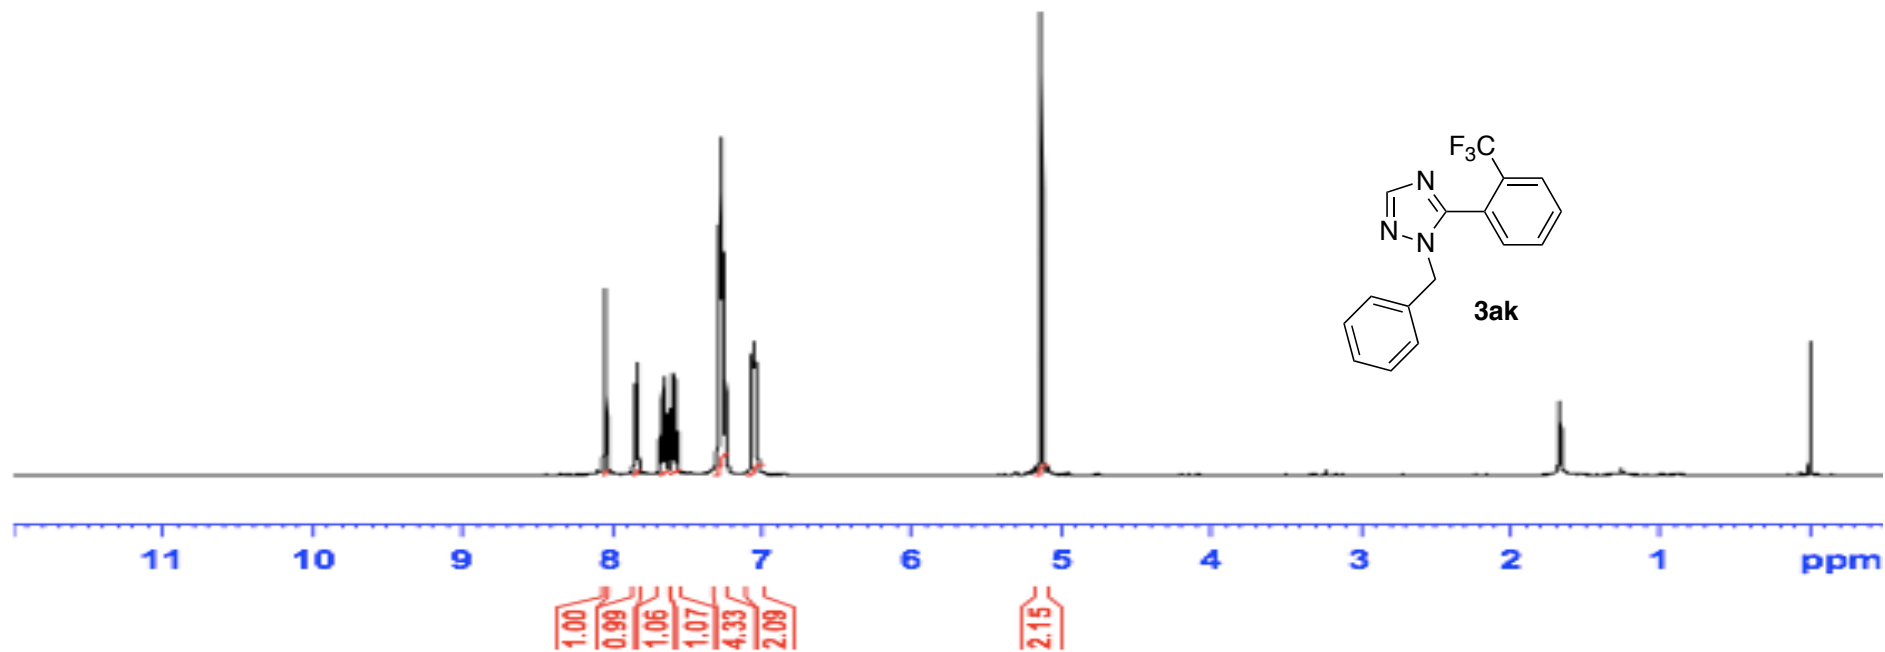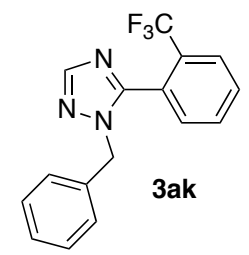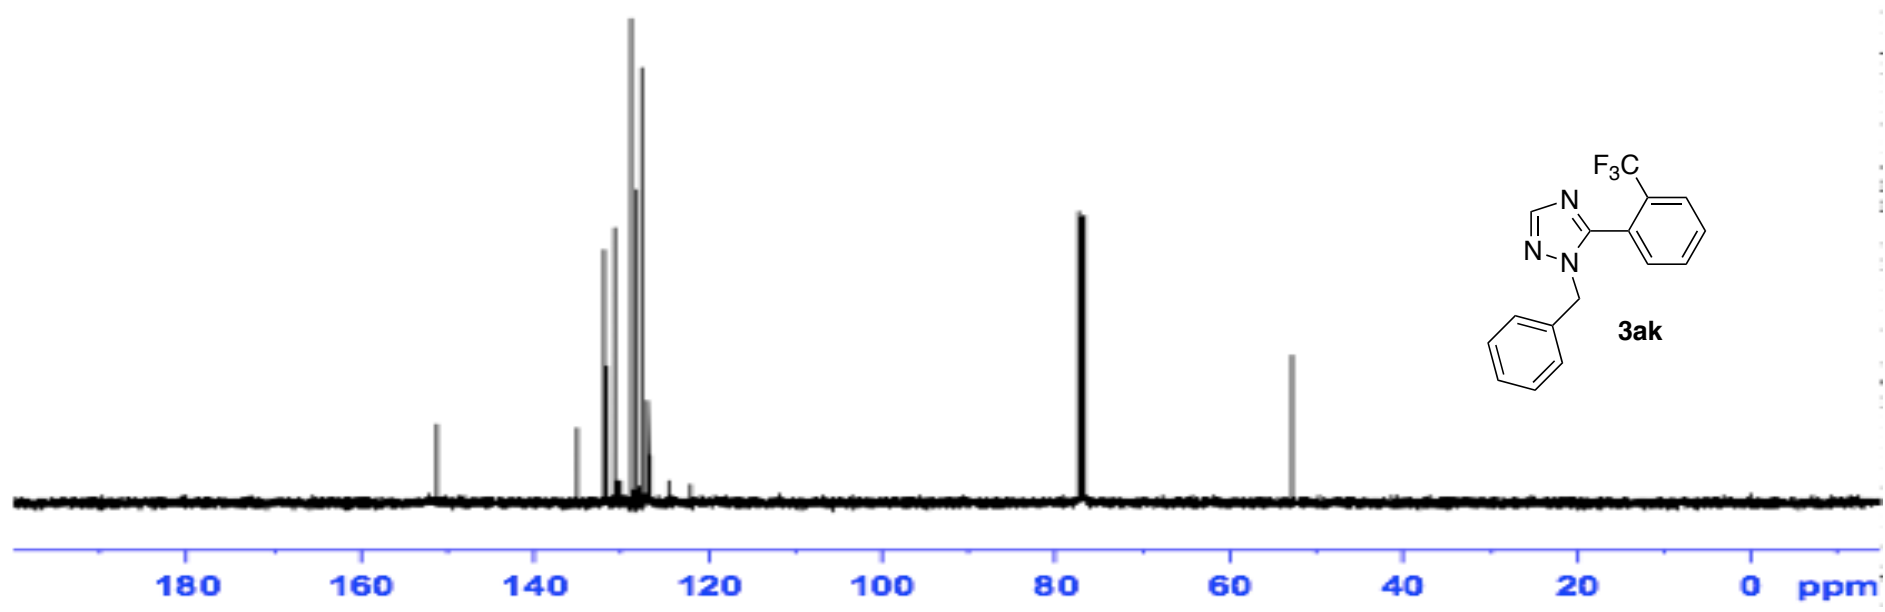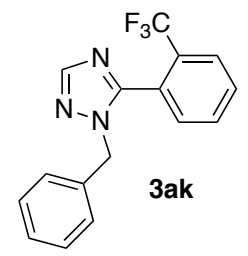

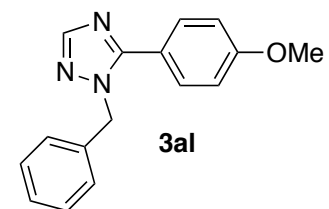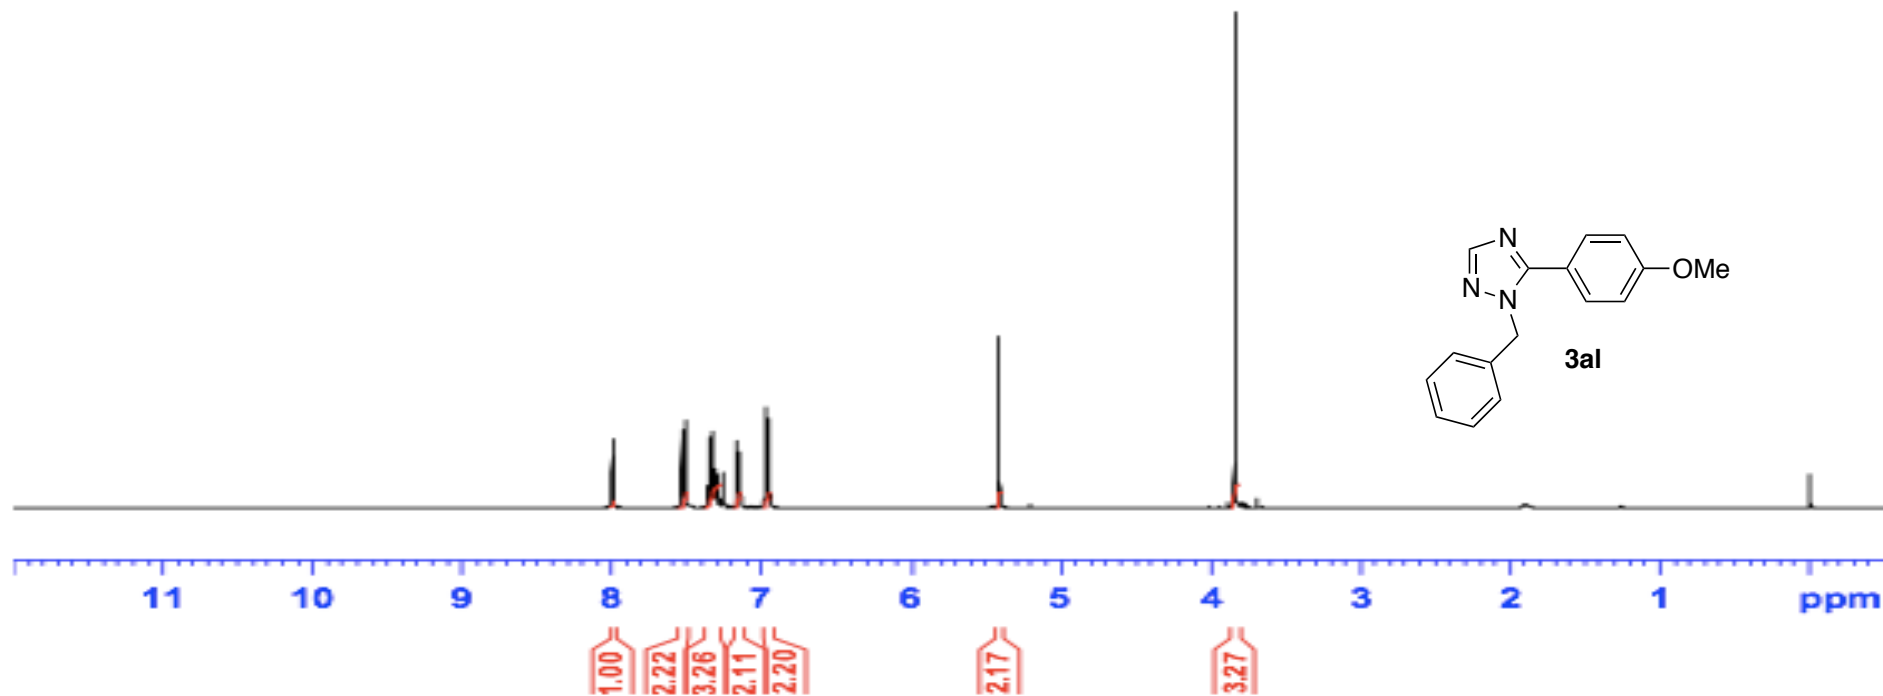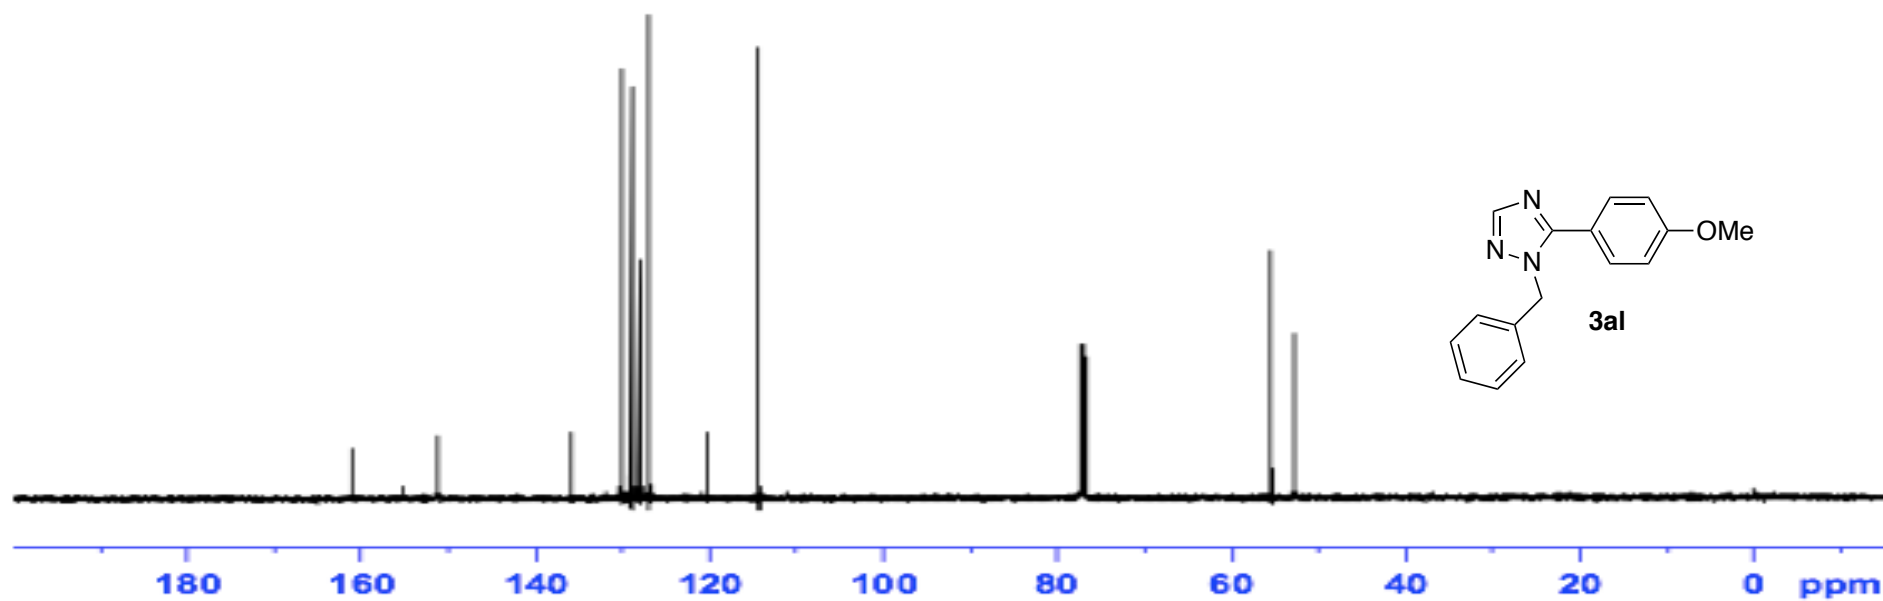

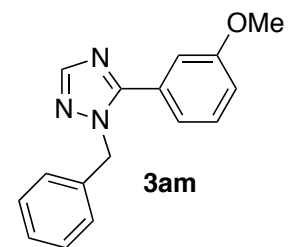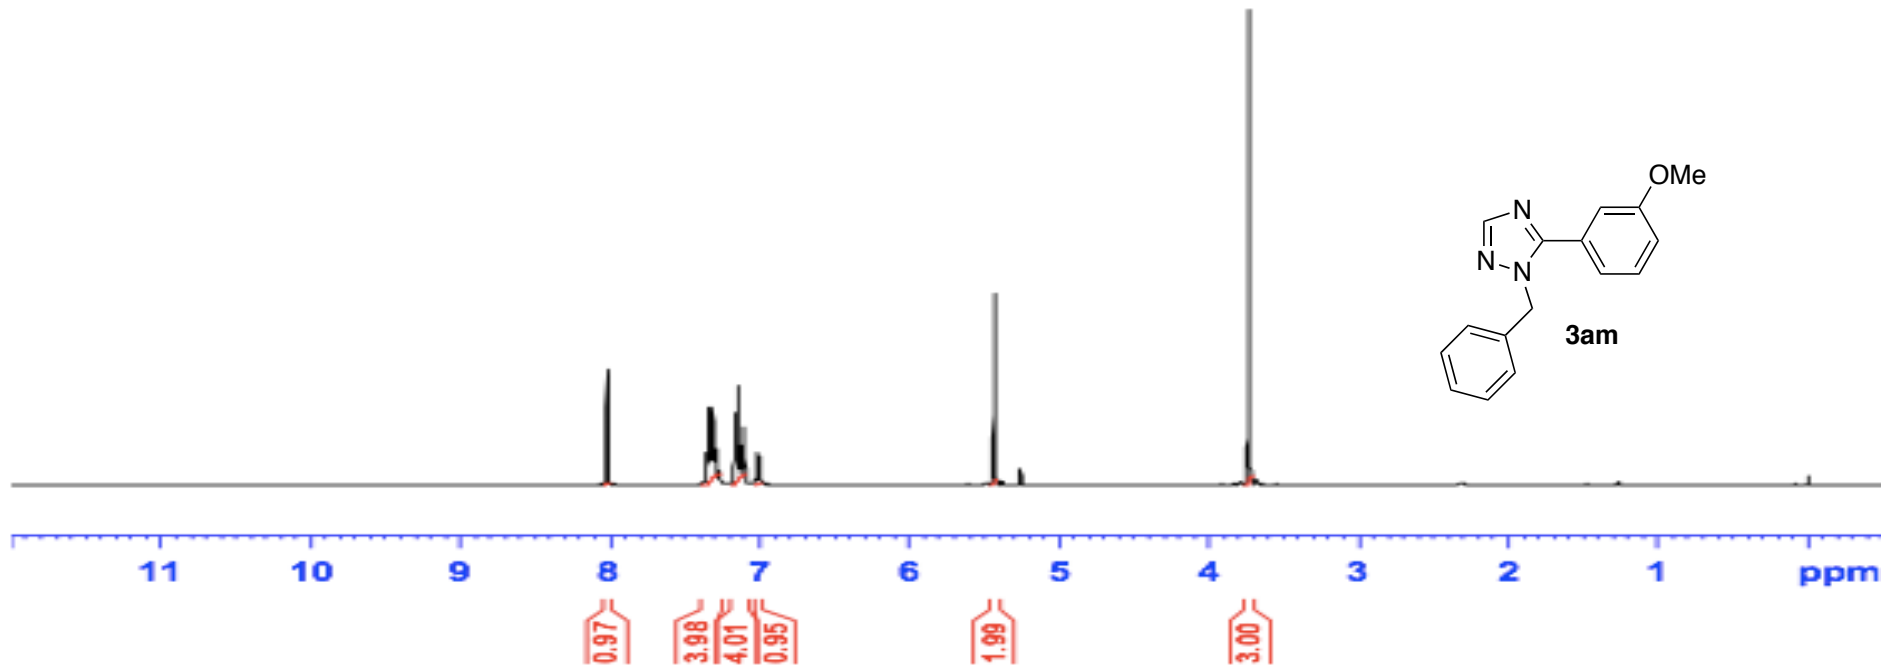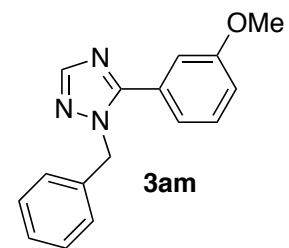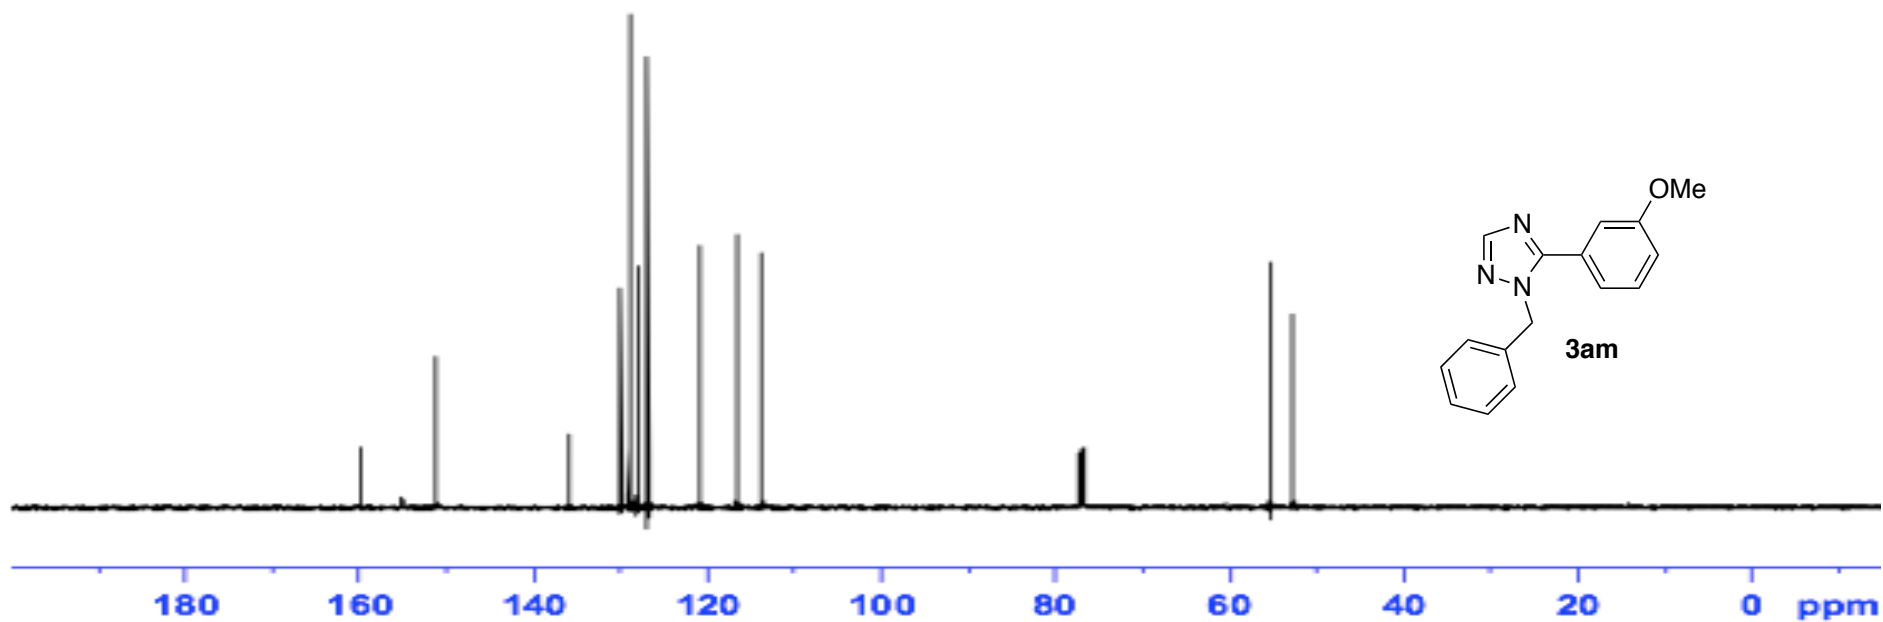

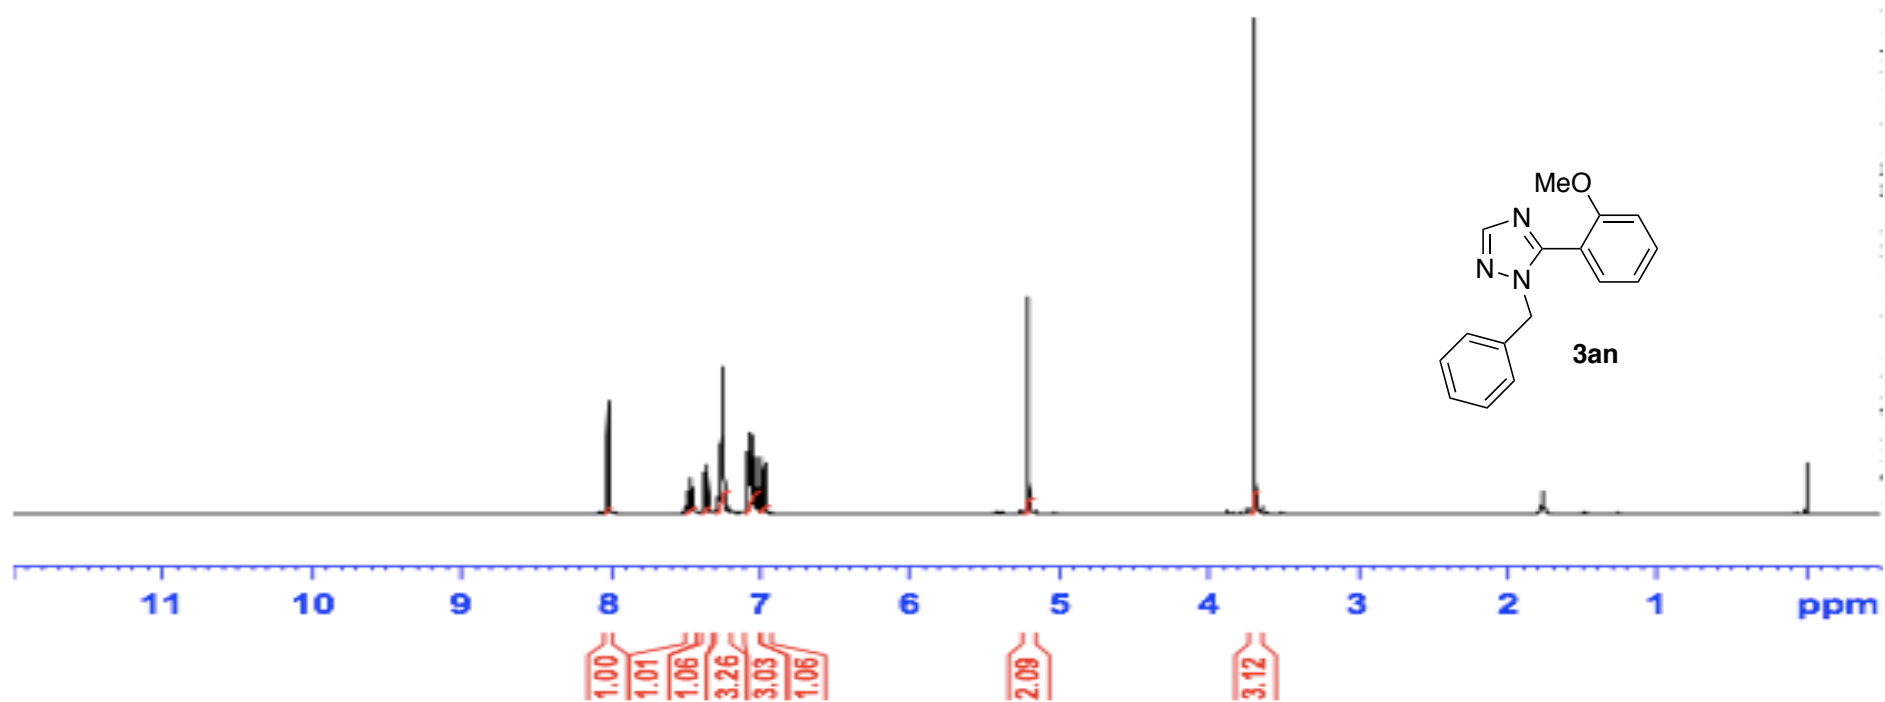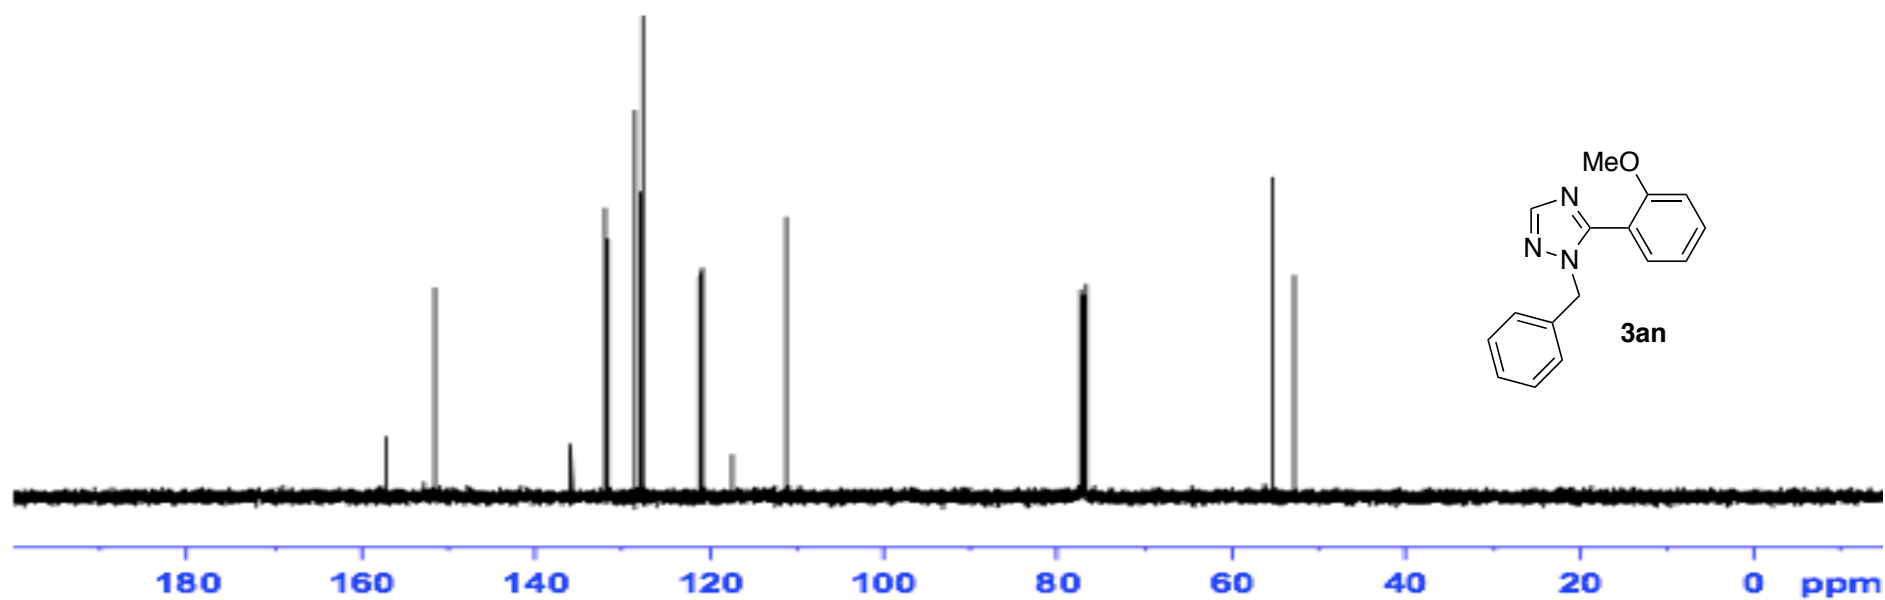

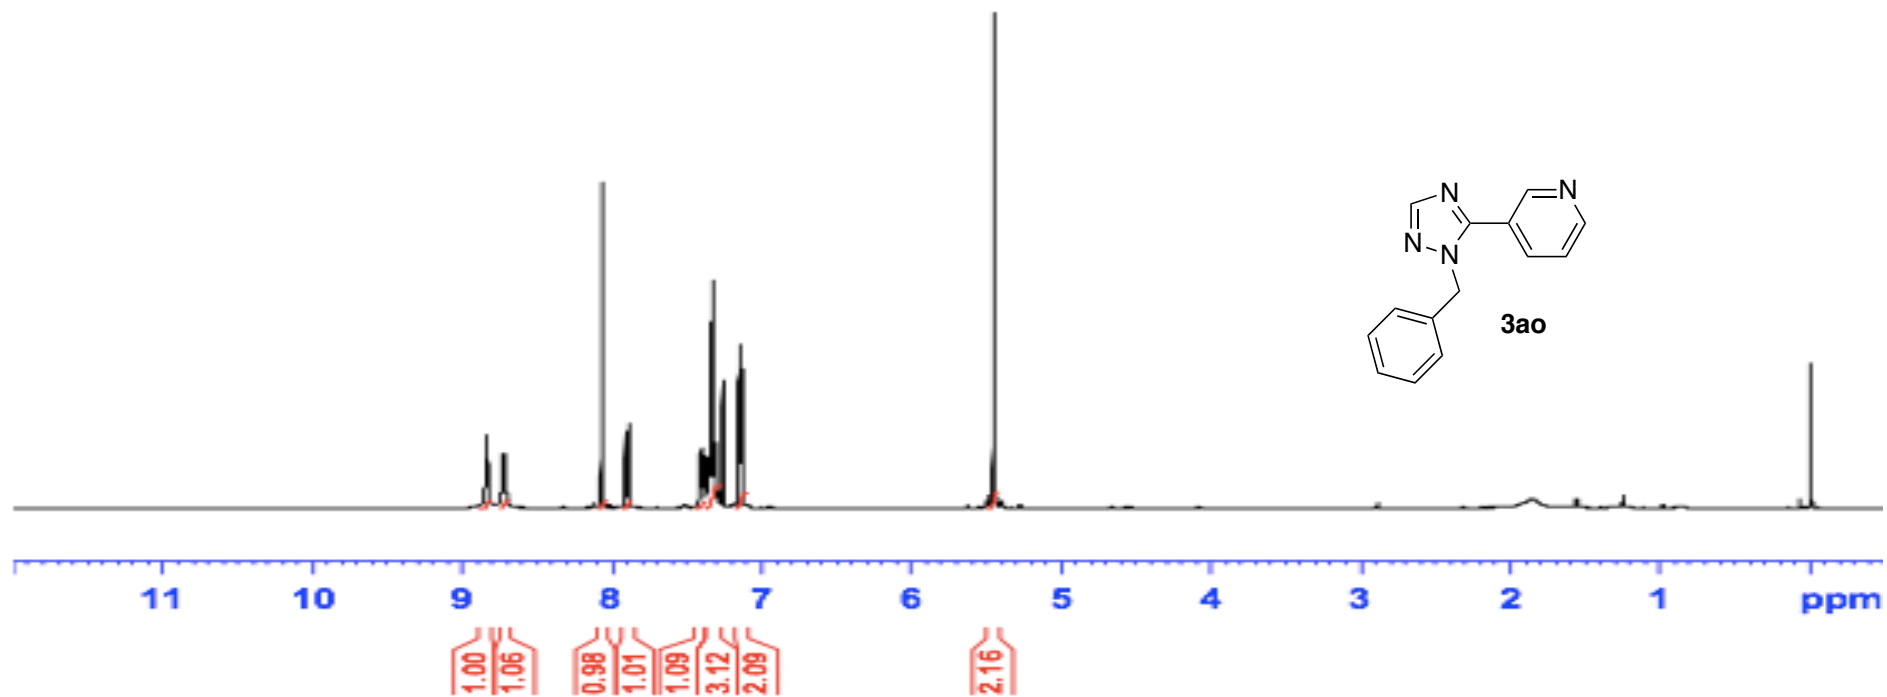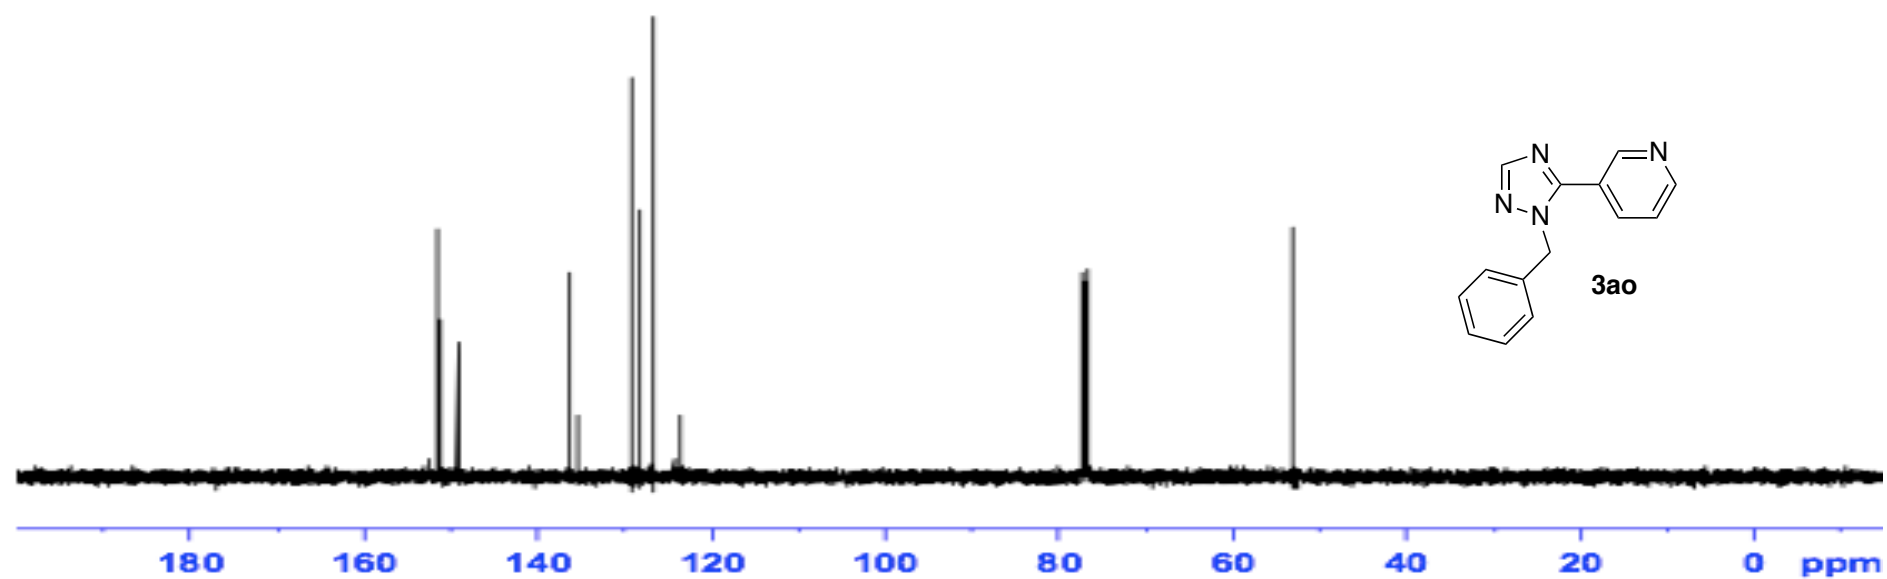

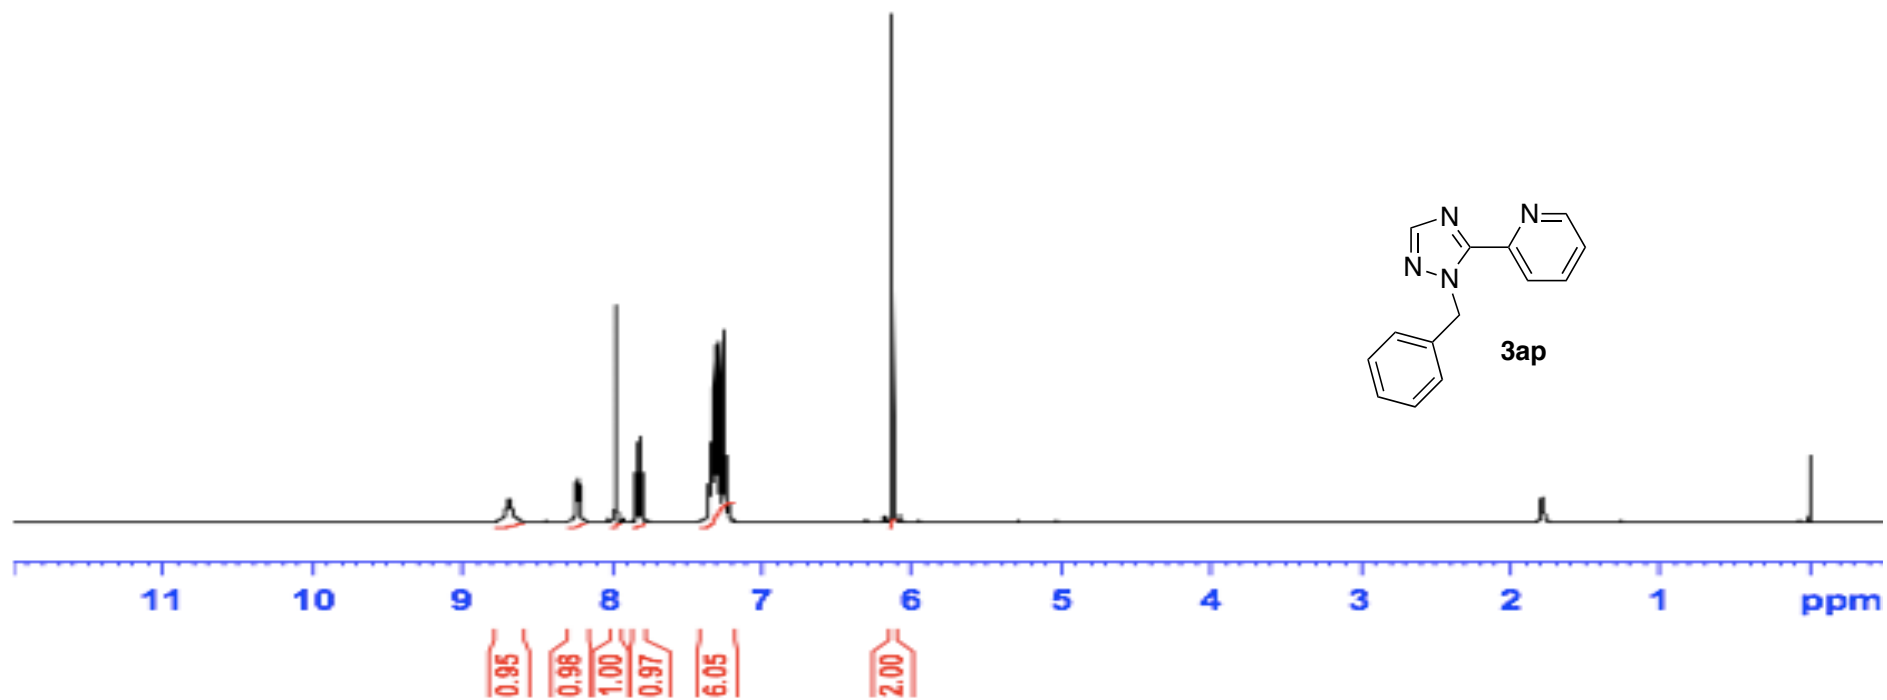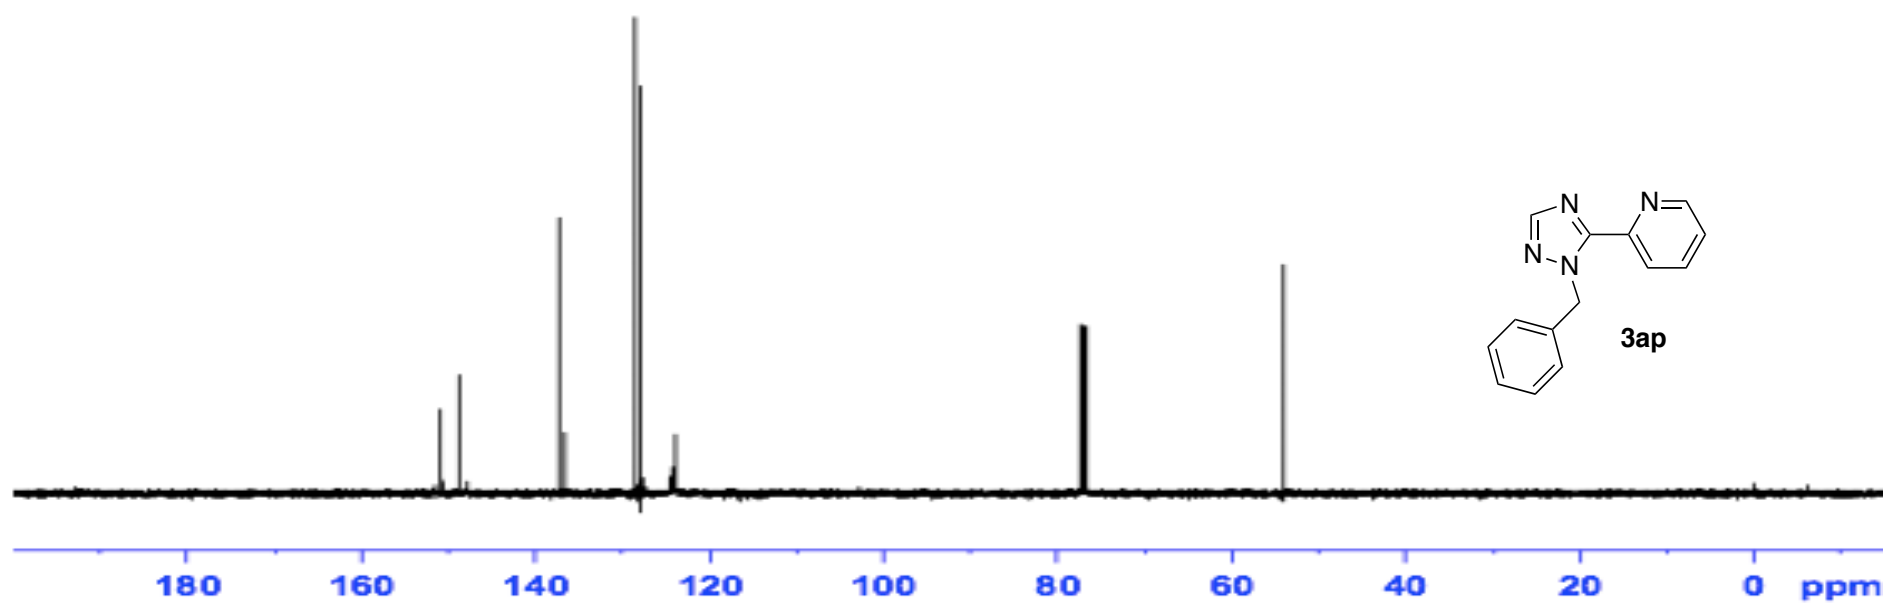

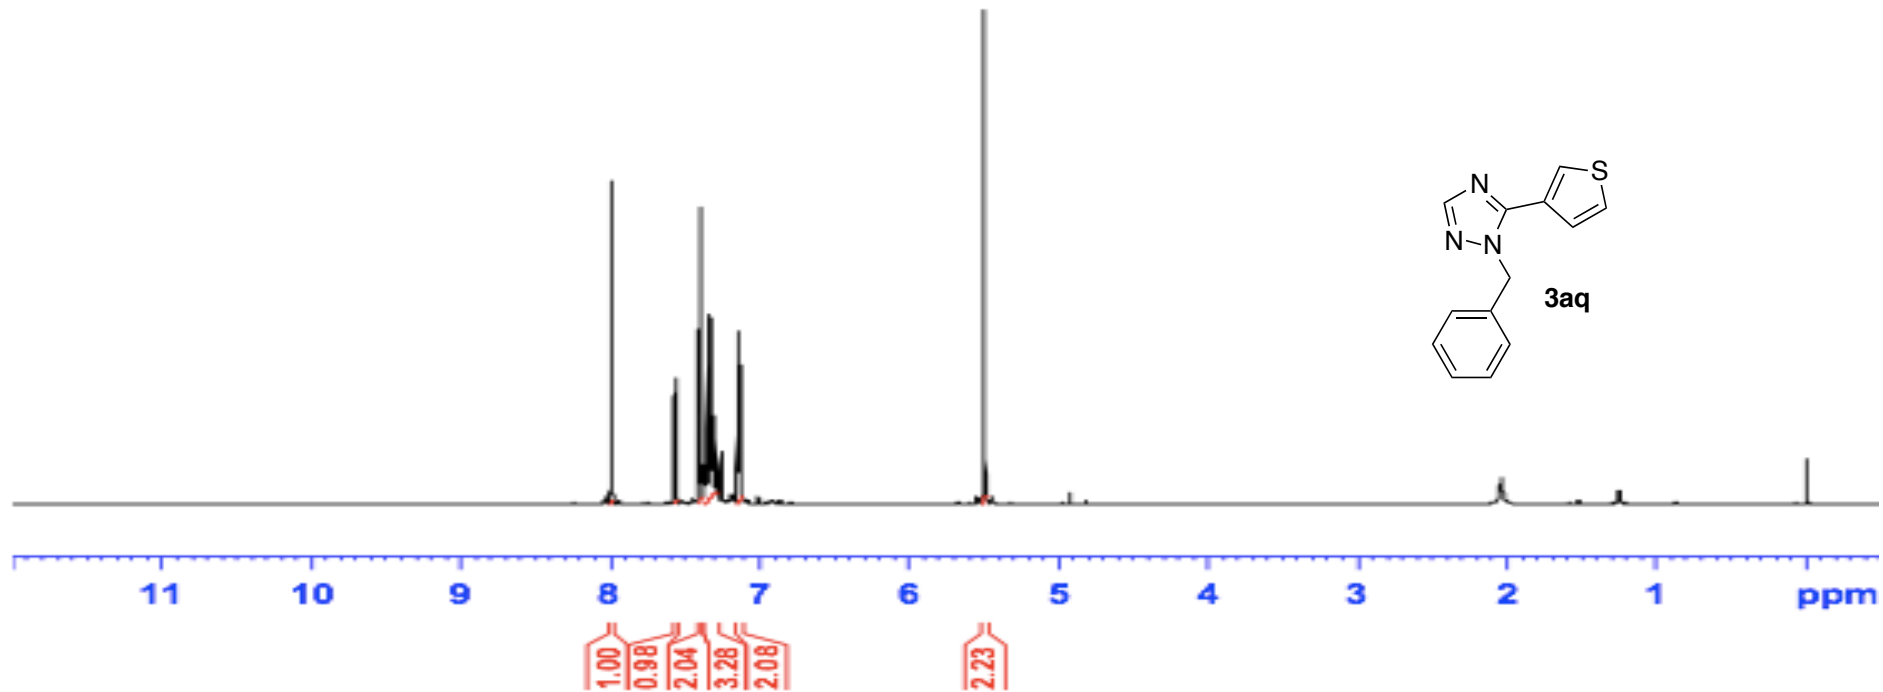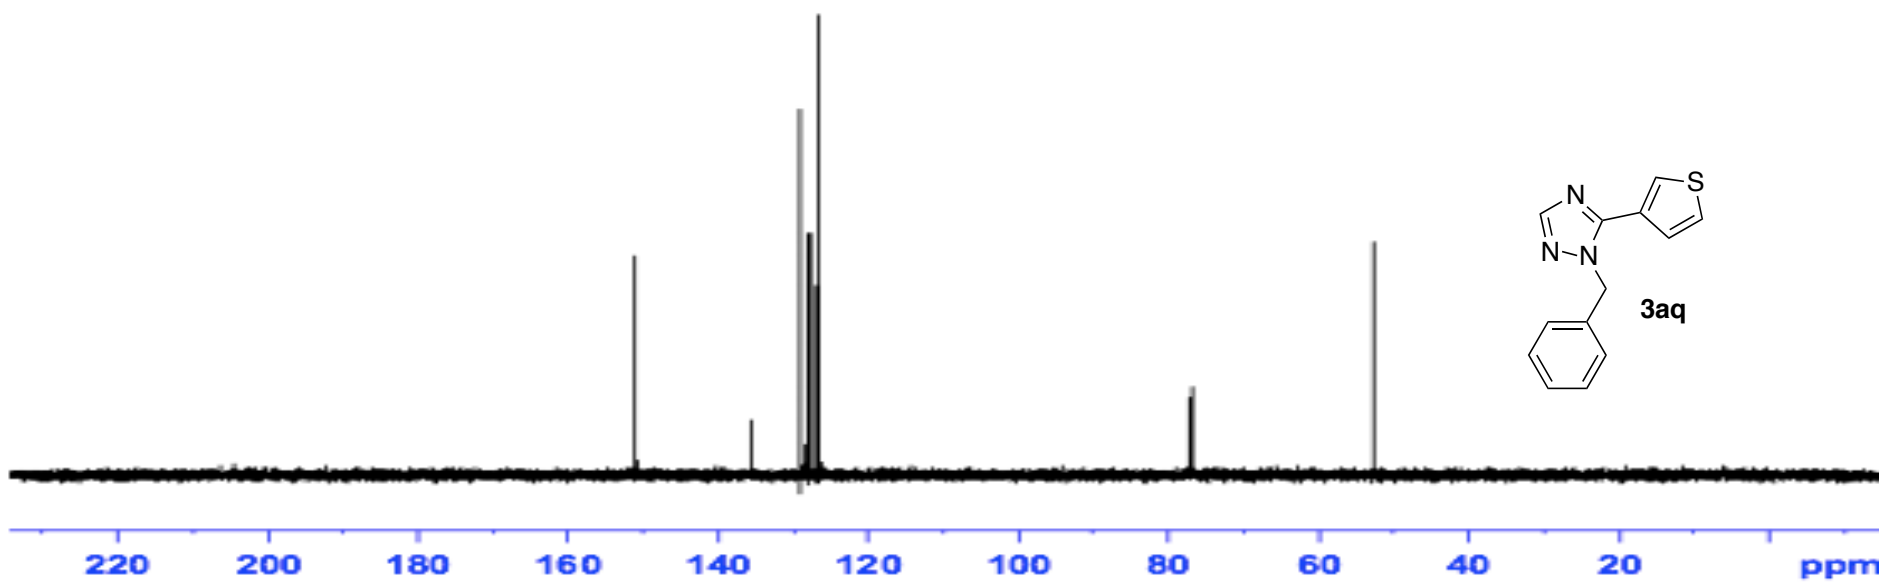



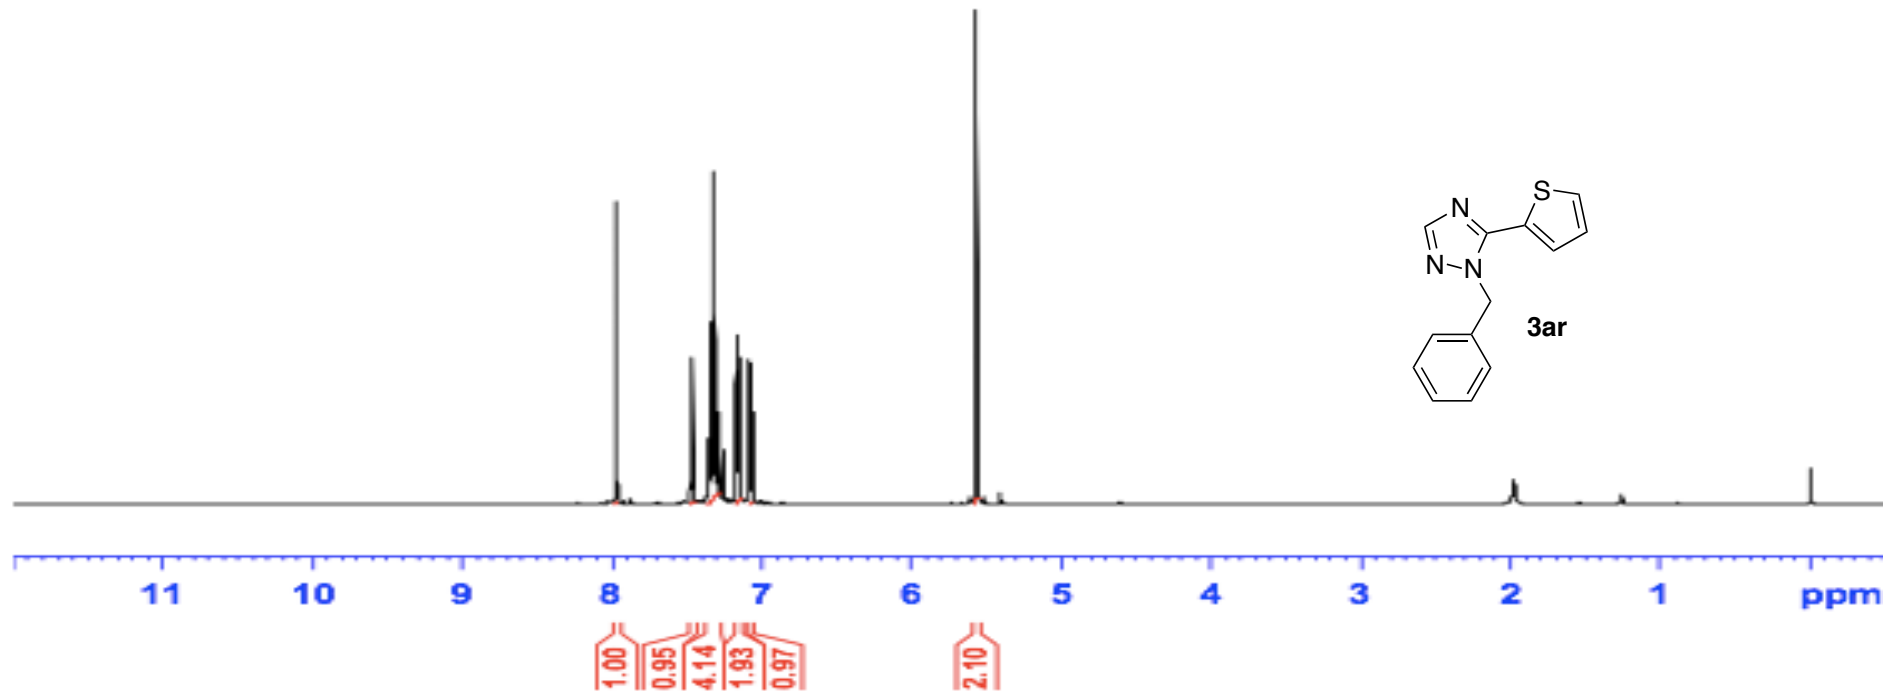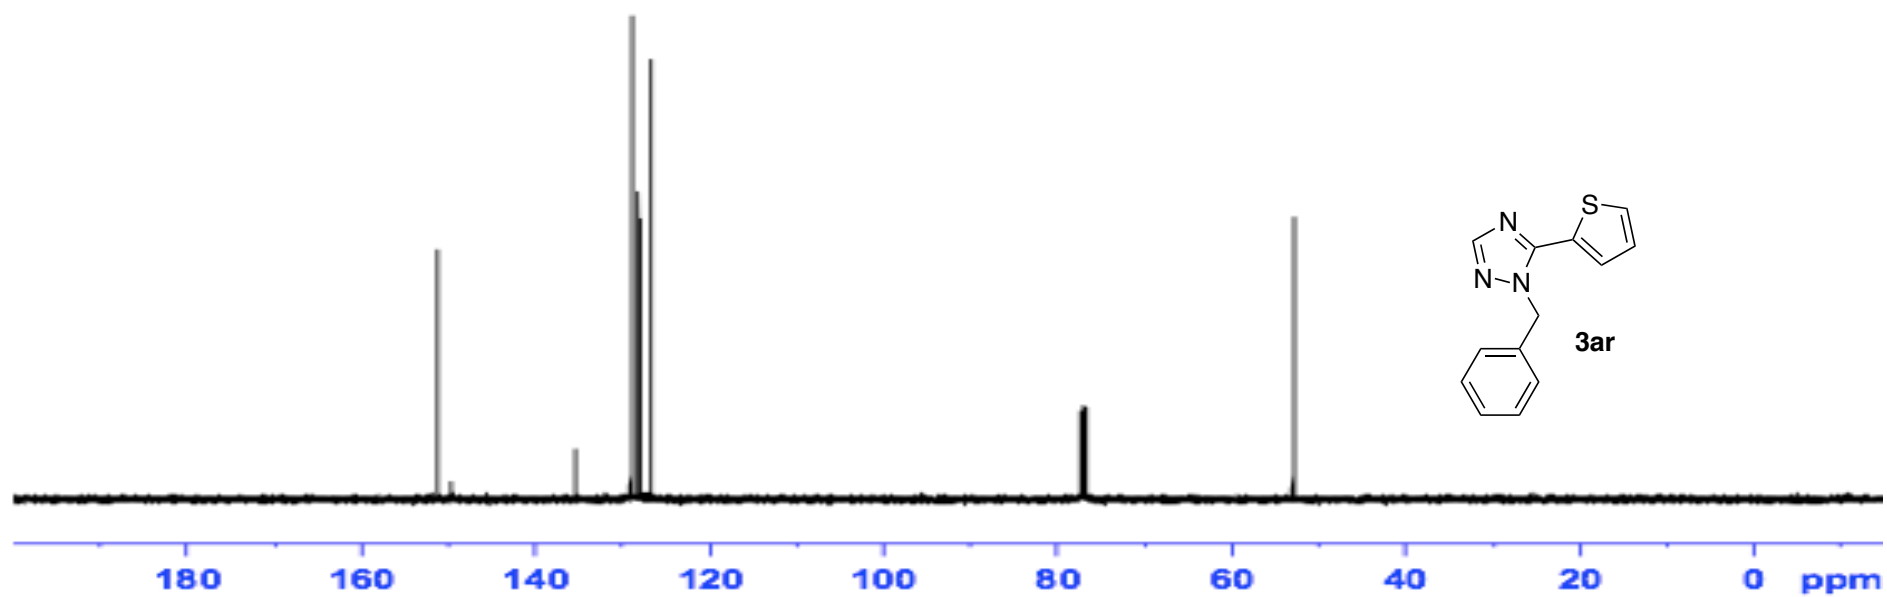

Supplement: c6ra14670h1.pdf [file c6ra14670h1.pdf]
